# Supplementary material for: Coordination sequences of 2-uniform graphs
Source: publisher site journal article supplement (doi:10.1515/zkri-2020-0002), 2020-04-18
Supplement: Supplementary file 1 [file Supplementary materials.pdf › Supplement/Supplementary materials.pdf]

## Supplementary materials

| bew                                                                                | Plane group                             | $a$                           | $b$    | $\gamma, ^\circ$   |                                 |
|------------------------------------------------------------------------------------|-----------------------------------------|-------------------------------|--------|--------------------|---------------------------------|
| 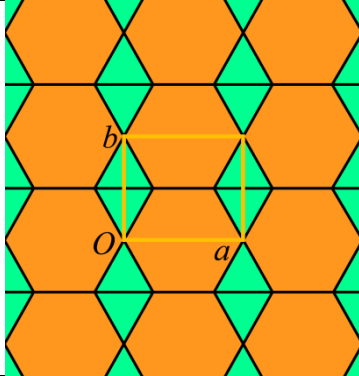  | $p2mm$                                  | 2.0000                        | 1.7321 | 90                 |                                 |
|                                                                                    |                                         |                               |        |                    |                                 |
|                                                                                    | Vertex                                  | CN                            | $x$    | $y$                |                                 |
|                                                                                    | $u_1$                                   | 4                             | 0      | 0                  |                                 |
|                                                                                    | $u_2$                                   | 4                             | 0.25   | 0.5                |                                 |
|                                                                                    |                                         |                               |        |                    |                                 |
| Growth polygon                                                                     | Number of the growth polygon vertex $i$ | Vertex fractional coordinates |        | $\alpha_i, ^\circ$ | Length of the ray $d(\Gamma_i)$ |
|  | 0                                       | 1/2                           | 0      | 0                  | 2                               |
|                                                                                    | 1                                       | 1/3                           | 1/3    | 40.893             | 3                               |
|                                                                                    | 2                                       | 0                             | 1/2    | 90                 | 2                               |
|                                                                                    | 3                                       | -1/3                          | 1/3    | 139.107            | 3                               |
|                                                                                    | 4                                       | -1/2                          | 0      | 180                | 2                               |
|                                                                                    | 5                                       | -1/3                          | -1/3   | 220.893            | 3                               |
|                                                                                    | 6                                       | 0                             | -1/2   | 270                | 2                               |
|                                                                                    | 7                                       | 1/3                           | -1/3   | 319.107            | 3                               |

### Vertex $u_1$

Tab. 1: Values of  $\sigma_{i,k}$  and  $d(x, x_i)$

| Number of the sector, $i$ | $k$ |   |   |   |   | $d(x, x_i)$ |
|---------------------------|-----|---|---|---|---|-------------|
|                           | 1   | 2 | 3 | 4 | 5 |             |
| 0                         | 0   | 0 | 1 | 1 | 1 | 2           |
| 1                         | 1   | 0 | 0 | 1 | 1 | 0           |
| 2                         | 1   | 0 | 0 | 1 | 1 | 0           |
| 3                         | 0   | 0 | 1 | 1 | 1 | 2           |
| 4                         | 0   | 0 | 1 | 1 | 1 | 2           |
| 5                         | 1   | 0 | 0 | 1 | 1 | 0           |
| 6                         | 1   | 0 | 0 | 1 | 1 | 0           |
| 7                         | 0   | 0 | 1 | 1 | 1 | 2           |

Tab. 2: Values of  $\delta_{i,k}^{(1)}$  and  $\delta_{i,k}^{(2)}$ .

| Number of the sector, $i$ | $\delta_{i,k}^{(1)}$ |   | $\delta_{i,k}^{(2)}$ |   |
|---------------------------|----------------------|---|----------------------|---|
|                           | $k$                  |   | $k$                  |   |
|                           | 0                    | 1 | 0                    | 1 |
| 0                         | 1                    | 2 | 1                    | 1 |
| 1                         | 1                    | 0 | 1                    | 0 |

|   |   |   |   |   |
|---|---|---|---|---|
| 2 | 1 | 0 | 0 | 0 |
| 3 | 1 | 0 | 1 | 0 |
| 4 | 1 | 2 | 1 | 1 |
| 5 | 1 | 0 | 1 | 0 |
| 6 | 1 | 0 | 0 | 0 |
| 7 | 1 | 0 | 1 | 0 |

For  $n \geq 3$

$$e_n(u_1) = 4r_2(n-1; 2, 3) + 4r_2(n-4; 2, 3) + 8r_2(n-5; 2, 3) + 4r_2(n-6; 2, 3) + 4r_2(n-7; 2, 3) + 6r_1(n; 2) + 6r_1(n-1; 2) + 4r_1(n; 3) + 4r_1(n-2; 3).$$

$$\text{For } n \geq 3 \quad e_n(u_1) = \begin{cases} 4n-2, n \equiv 0, 2, 4(\text{mod } 6) \\ 4n+2, n \equiv 1, 3, 5(\text{mod } 6) \end{cases}.$$

### Vertex $u_2$

Tab. 1: Values of  $\sigma_{i,k}$  and  $d(x, x_i)$

| Number of the sector, $i$ | $k$ |   |   |   |   | $d(x, x_i)$ |
|---------------------------|-----|---|---|---|---|-------------|
|                           | 1   | 2 | 3 | 4 | 5 |             |
| 0                         | 0   | 1 | 0 | 1 | 1 | 0           |
| 1                         | 0   | 0 | 1 | 1 | 1 | 0           |
| 2                         | 1   | 1 | 0 | 0 | 1 | 0           |
| 3                         | 0   | 0 | 1 | 1 | 1 | 0           |
| 4                         | 0   | 0 | 1 | 1 | 1 | 0           |
| 5                         | 1   | 1 | 0 | 0 | 1 | 0           |
| 6                         | 0   | 0 | 1 | 1 | 1 | 0           |
| 7                         | 0   | 1 | 0 | 1 | 1 | 0           |

Tab. 2: Values of  $\delta_{i,k}^{(1)}$  and  $\delta_{i,k}^{(2)}$ .

| Number of the sector, $i$ | $\delta_{i,k}^{(1)}$ |   | $\delta_{i,k}^{(2)}$ |   |
|---------------------------|----------------------|---|----------------------|---|
|                           | $k$                  |   | $k$                  |   |
|                           | 0                    | 1 | 0                    | 1 |
| 0                         | 1                    | 1 | 0                    | 0 |
| 1                         | 1                    | 0 | 0                    | 0 |
| 2                         | 1                    | 0 | 0                    | 0 |
| 3                         | 1                    | 0 | 0                    | 0 |
| 4                         | 1                    | 1 | 0                    | 0 |
| 5                         | 1                    | 0 | 0                    | 0 |
| 6                         | 1                    | 0 | 0                    | 0 |
| 7                         | 1                    | 0 | 0                    | 0 |

For  $n \geq 1$

$$e_n(u_2) = 2r_2(n-1; 2, 3) + 4r_2(n-2; 2, 3) + 4r_2(n-3; 2, 3) + 6r_2(n-4; 2, 3) + 8r_2(n-5; 2, 3) + 4r_1(n; 2) + 2r_1(n-1; 2) + 4r_1(n; 3).$$

$$\text{For } n \geq 1 \quad e_n(u_2) = 4n, n \equiv 0, 1, 2, 3, 4, 5(\text{mod } 6).$$

| cph                                                                                | Plane group                             | $a$                           | $b$    | $\gamma, ^\circ$   |                                 |
|------------------------------------------------------------------------------------|-----------------------------------------|-------------------------------|--------|--------------------|---------------------------------|
| 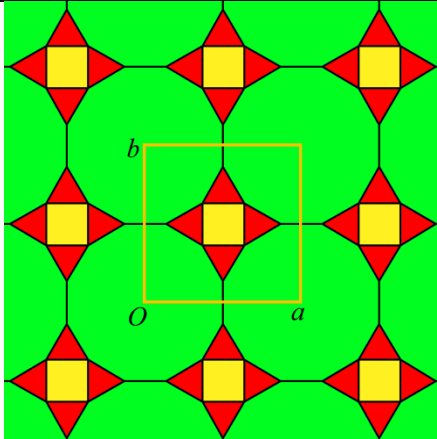  | $p4mm$                                  | 3.7321                        | 3.7321 | 90                 |                                 |
|                                                                                    |                                         |                               |        |                    |                                 |
|                                                                                    | Vertex                                  | CN                            | $x$    | $y$                |                                 |
|                                                                                    | $u_1$                                   | 3                             | 0.1340 | 0.5                |                                 |
|                                                                                    | $u_2$                                   | 4                             | 0.3660 | 0.3660             |                                 |
|                                                                                    |                                         |                               |        |                    |                                 |
| Growth polygon                                                                     | Number of the growth polygon vertex $i$ | Vertex fractional coordinates |        | $\alpha_i, ^\circ$ | Length of the ray $d(\Gamma_i)$ |
|  | 0                                       | 1/4                           | 0      | 0                  | 4                               |
|                                                                                    | 1                                       | 1/6                           | 1/6    | 45                 | 6                               |
|                                                                                    | 2                                       | 0                             | 1/4    | 90                 | 4                               |
|                                                                                    | 3                                       | -1/6                          | 1/6    | 135                | 6                               |
|                                                                                    | 4                                       | -1/4                          | 0      | 180                | 4                               |
|                                                                                    | 5                                       | -1/6                          | -1/6   | 225                | 6                               |
|                                                                                    | 6                                       | 0                             | -1/4   | 270                | 4                               |
|                                                                                    | 7                                       | 1/6                           | -1/6   | 315                | 6                               |

### Vertex $u_1$

Tab. 1: Values of  $\sigma_{i,k}$  and  $d(x, x_i)$

| Number of the sector, $i$ | $k$ |   |   |   |   |   |   |   |   |    | $d(x, x_i)$ |
|---------------------------|-----|---|---|---|---|---|---|---|---|----|-------------|
|                           | 1   | 2 | 3 | 4 | 5 | 6 | 7 | 8 | 9 | 10 |             |
| 0                         | 1   | 1 | 0 | 0 | 0 | 1 | 2 | 1 | 1 | 1  | 0           |
| 1                         | 0   | 1 | 2 | 0 | 0 | 0 | 1 | 2 | 1 | 1  | 2           |
| 2                         | 1   | 1 | 0 | 0 | 0 | 1 | 2 | 1 | 1 | 1  | 4           |
| 3                         | 0   | 1 | 2 | 0 | 0 | 0 | 1 | 2 | 1 | 1  | 0           |
| 4                         | 0   | 1 | 2 | 0 | 0 | 0 | 1 | 2 | 1 | 1  | 0           |
| 5                         | 1   | 1 | 0 | 0 | 0 | 1 | 2 | 1 | 1 | 1  | 4           |
| 6                         | 0   | 1 | 2 | 0 | 0 | 0 | 1 | 2 | 1 | 1  | 2           |
| 7                         | 1   | 1 | 0 | 0 | 0 | 1 | 2 | 1 | 1 | 1  | 0           |

Tab. 2: Values of  $\delta_{i,k}^{(1)}$  and  $\delta_{i,k}^{(2)}$ .

| Number of the sector, $i$ | $\delta_{i,k}^{(1)}$ |   |   |   |   | $\delta_{i,k}^{(2)}$ |   |   |   |   |
|---------------------------|----------------------|---|---|---|---|----------------------|---|---|---|---|
|                           | $k$                  |   |   |   |   | $k$                  |   |   |   |   |
|                           | 0                    | 1 | 2 | 3 | 4 | 0                    | 1 | 2 | 3 | 4 |
| 0                         | 1                    | 0 | 0 | 1 | 0 | 0                    | 0 | 0 | 0 | 0 |
| 1                         | 1                    | 0 | 0 | 0 | 1 | 0                    | 0 | 0 | 0 | 0 |
| 2                         | 1                    | 1 | 2 | 1 | 0 | 1                    | 1 | 1 | 2 | 0 |



For  $n \geq 7$

$$\begin{aligned} e_n(u_2) = & 2r_2(n-1;4,6) + 3r_2(n-2;4,6) + 3r_2(n-3;4,6) + 6r_2(n-4;4,6) + 8r_2(n-5;4,6) + 5r_2(n-6;4,6) + \\ & + 5r_2(n-7;4,6) + 4r_2(n-8;4,6) + 8r_2(n-9;4,6) + 11r_2(n-10;4,6) + 4r_2(n-11;4,6) + 2r_2(n-12;4,6) + \\ & + r_2(n-13;4,6) + r_2(n-15;4,6) + r_2(n-16;4,6) + 5r_1(n;4) + 4r_1(n-1;4) + 2r_1(n-2;4) + 3r_1(n-3;4) + \\ & + 6r_1(n;6) + 5r_1(n-1;6) + 3r_1(n-2;6) + r_1(n-3;6) + r_1(n-4;6) + r_1(n-5;6). \end{aligned}$$

For  $n \geq 7$

$$e_n(u_2) = \begin{cases} \frac{8n-3}{3}, n \equiv 0, 6(\text{mod } 12) \\ \frac{8n+10}{3}, n \equiv 1(\text{mod } 12) \\ \frac{8n-1}{3}, n \equiv 2, 8(\text{mod } 12) \end{cases}, e_n(u_2) = \begin{cases} \frac{8n-6}{3}, n \equiv 3(\text{mod } 12) \\ \frac{8n+4}{3}, n \equiv 4, 10(\text{mod } 12) \\ \frac{8n+2}{3}, n \equiv 5(\text{mod } 12) \end{cases}, e_n(u_2) = \begin{cases} \frac{8n-2}{3}, n \equiv 7(\text{mod } 12) \\ \frac{8n+6}{3}, n \equiv 9(\text{mod } 12) \\ \frac{8n-10}{3}, n \equiv 11(\text{mod } 12) \end{cases}.$$

| kra                                                                                | Plane group                             | $a$                           | $b$    | $\gamma, ^\circ$   |                                 |
|------------------------------------------------------------------------------------|-----------------------------------------|-------------------------------|--------|--------------------|---------------------------------|
| 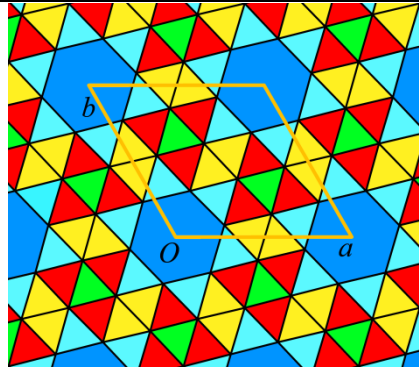  | $p6$                                    | 3.6056                        | 3.6056 | 120                |                                 |
|                                                                                    |                                         |                               |        |                    |                                 |
|                                                                                    | Vertex                                  | CN                            | $x$    | $y$                |                                 |
|                                                                                    | $u_1$                                   | 6                             | 0.1539 | 0.5385             |                                 |
|                                                                                    | $u_2$                                   | 5                             | 0.3077 | 0.0769             |                                 |
|                                                                                    |                                         |                               |        |                    |                                 |
| Growth polygon                                                                     | Number of the growth polygon vertex $i$ | Vertex fractional coordinates |        | $\alpha_i, ^\circ$ | Length of the ray $d(\Gamma_i)$ |
|                                                                                    |                                         | $x_i$                         | $y_i$  |                    |                                 |
|  | 0                                       | 1/4                           | 0      | 0                  | 4                               |
|                                                                                    | 1                                       | 3/10                          | 1/10   | 19.107             | 10                              |
|                                                                                    | 2                                       | 1/4                           | 1/4    | 60                 | 4                               |
|                                                                                    | 3                                       | 1/5                           | 3/10   | 79.107             | 10                              |
|                                                                                    | 4                                       | 0                             | 1/4    | 120                | 4                               |
|                                                                                    | 5                                       | -1/10                         | 1/5    | 139.107            | 10                              |
|                                                                                    | 6                                       | -1/4                          | 0      | 180                | 4                               |
|                                                                                    | 7                                       | -3/10                         | -1/10  | 199.107            | 10                              |
|                                                                                    | 8                                       | -1/4                          | -1/4   | 240                | 4                               |
|                                                                                    | 9                                       | -1/5                          | -3/10  | 259.107            | 10                              |
|                                                                                    | 10                                      | 0                             | -1/4   | 300                | 4                               |
|                                                                                    | 11                                      | 1/10                          | -1/5   | 319.107            | 10                              |

**Vertex  $u_1$**

Tab. 1: Values of  $\sigma_{i,k}$  and  $d(x, x_i)$

| Number of the sector, $i$ | $k$ |   |   |   |   |   |   |   |   |    |    |    |    |    | $d(x, x_i)$ |
|---------------------------|-----|---|---|---|---|---|---|---|---|----|----|----|----|----|-------------|
|                           | 1   | 2 | 3 | 4 | 5 | 6 | 7 | 8 | 9 | 10 | 11 | 12 | 13 | 14 |             |
| 0                         | 1   | 1 | 1 | 1 | 1 | 0 | 0 | 1 | 1 | 1  | 1  | 1  | 1  | 1  | 0           |
| 1                         | 0   | 1 | 1 | 2 | 3 | 3 | 3 | 3 | 3 | 1  | 2  | 1  | 0  | 1  | 0           |
| 2                         | 1   | 1 | 1 | 1 | 1 | 1 | 1 | 0 | 0 | 1  | 1  | 1  | 1  | 1  | 0           |
| 3                         | 0   | 1 | 2 | 2 | 2 | 3 | 3 | 3 | 3 | 2  | 2  | 0  | 0  | 1  | 0           |
| 4                         | 1   | 0 | 0 | 1 | 1 | 1 | 1 | 1 | 1 | 1  | 1  | 1  | 1  | 1  | 0           |
| 5                         | 0   | 1 | 2 | 2 | 3 | 2 | 3 | 3 | 2 | 2  | 2  | 1  | 0  | 1  | 0           |
| 6                         | 1   | 1 | 1 | 1 | 1 | 1 | 0 | 0 | 1 | 1  | 1  | 1  | 1  | 1  | 0           |
| 7                         | 0   | 1 | 2 | 1 | 3 | 3 | 3 | 3 | 3 | 2  | 1  | 1  | 0  | 1  | 0           |
| 8                         | 1   | 1 | 1 | 1 | 0 | 0 | 1 | 1 | 1 | 1  | 1  | 1  | 1  | 1  | 0           |
| 9                         | 0   | 0 | 2 | 2 | 3 | 3 | 3 | 3 | 2 | 2  | 2  | 1  | 0  | 1  | 0           |
| 10                        | 1   | 1 | 1 | 1 | 1 | 1 | 1 | 1 | 1 | 1  | 0  | 0  | 1  | 1  | 0           |
| 11                        | 0   | 1 | 2 | 2 | 2 | 3 | 3 | 2 | 3 | 2  | 2  | 1  | 0  | 1  | 0           |

Tab. 2: Values of  $\delta_{i,k}^{(1)}$  and  $\delta_{i,k}^{(2)}$ .

| Number<br>of the<br>sector, $i$ | $\delta_{i,k}^{(1)}$ | $\delta_{i,k}^{(1)}$ |
|---------------------------------|----------------------|----------------------|
|                                 | $k$                  | $k$                  |
|                                 | 0                    | 0                    |
| 0                               | 1                    | 0                    |
| 1                               | 1                    | 0                    |
| 2                               | 1                    | 0                    |
| 3                               | 1                    | 0                    |
| 4                               | 1                    | 0                    |
| 5                               | 1                    | 0                    |
| 6                               | 1                    | 0                    |
| 7                               | 1                    | 0                    |
| 8                               | 1                    | 0                    |
| 9                               | 1                    | 0                    |
| 10                              | 1                    | 0                    |
| 11                              | 1                    | 0                    |

For  $n \geq 1$

$$e_n(u_1) = 6r_2(n-1; 4, 10) + 10r_2(n-2; 4, 10) + 16r_2(n-3; 4, 10) + 17r_2(n-4; 4, 10) + 21r_2(n-5; 4, 10) + \\ + 21r_2(n-6; 4, 10) + 22r_2(n-7; 4, 10) + 21r_2(n-8; 4, 10) + 21r_2(n-9; 4, 10) + 17r_2(n-10; 4, 10) + \\ + 16r_2(n-11; 4, 10) + 10r_2(n-12; 4, 10) + 6r_2(n-13; 4, 10) + 12r_2(n-14; 4, 10) + r_1(n; 4) + r_1(n; 8).$$

$$\text{For } n \geq 1 \quad e_n(u_1) = \begin{cases} \frac{27n}{5}, n \equiv 0, 5, 10, 15 \pmod{20} \\ \frac{27n+1}{5}, n \equiv 7, 17 \pmod{20} \\ \frac{27n-1}{5}, n \equiv 3, 13 \pmod{20} \\ \frac{27n+3}{5}, n \equiv 1, 11 \pmod{20} \\ \frac{27n-3}{5}, n \equiv 9, 19 \pmod{20} \end{cases}, \quad e_n(u_1) = \begin{cases} \frac{27n+4}{5}, n \equiv 8, 18 \pmod{20} \\ \frac{27n-4}{5}, n \equiv 2, 12 \pmod{20} \\ \frac{27n+7}{5}, n \equiv 4, 14 \pmod{20} \\ \frac{27n-7}{5}, n \equiv 6, 16 \pmod{20} \end{cases}.$$

### Vertex $u_2$

Tab. 1: Values of  $\sigma_{i,k}$  and  $d(x, x_i)$

| Number<br>of the<br>sector, $i$ | $k$ |   |   |   |   |   |   |   |   |    |    |    |    |    | $d(x, x_i)$ |
|---------------------------------|-----|---|---|---|---|---|---|---|---|----|----|----|----|----|-------------|
|                                 | 1   | 2 | 3 | 4 | 5 | 6 | 7 | 8 | 9 | 10 | 11 | 12 | 13 | 14 |             |
| 0                               | 1   | 1 | 1 | 1 | 1 | 1 | 1 | 1 | 1 | 1  | 1  | 0  | 0  | 1  | 0           |
| 1                               | 0   | 1 | 2 | 2 | 3 | 2 | 3 | 3 | 2 | 2  | 2  | 1  | 0  | 1  | 0           |
| 2                               | 1   | 1 | 0 | 0 | 1 | 1 | 1 | 1 | 1 | 1  | 1  | 1  | 1  | 1  | 0           |
| 3                               | 0   | 1 | 2 | 2 | 3 | 3 | 2 | 3 | 3 | 1  | 2  | 1  | 0  | 1  | 0           |
| 4                               | 1   | 1 | 1 | 0 | 0 | 1 | 1 | 1 | 1 | 1  | 1  | 1  | 1  | 1  | 0           |
| 5                               | 0   | 1 | 2 | 2 | 3 | 3 | 3 | 2 | 3 | 2  | 1  | 1  | 0  | 1  | 0           |
| 6                               | 0   | 0 | 1 | 1 | 1 | 1 | 1 | 1 | 1 | 1  | 1  | 1  | 1  | 1  | 0           |
| 7                               | 0   | 1 | 2 | 2 | 2 | 3 | 3 | 2 | 3 | 2  | 2  | 1  | 0  | 1  | 0           |
| 8                               | 1   | 1 | 1 | 1 | 1 | 1 | 1 | 1 | 1 | 0  | 0  | 1  | 1  | 1  | 0           |
| 9                               | 0   | 1 | 2 | 1 | 3 | 3 | 2 | 3 | 3 | 2  | 2  | 1  | 0  | 1  | 0           |
| 10                              | 1   | 1 | 1 | 1 | 1 | 1 | 1 | 1 | 0 | 0  | 1  | 1  | 1  | 1  | 0           |
| 11                              | 0   | 1 | 1 | 2 | 3 | 2 | 3 | 3 | 3 | 2  | 2  | 1  | 0  | 1  | 0           |

Tab. 2: Values of  $\delta_{i,k}^{(1)}$  and  $\delta_{i,k}^{(2)}$ .

| Number<br>of the<br>sector, $i$ | $\delta_{i,k}^{(1)}$ | $\delta_{i,k}^{(1)}$ |
|---------------------------------|----------------------|----------------------|
|                                 | $k$                  | $k$                  |
|                                 | 0                    | 0                    |
| 0                               | 1                    | 0                    |
| 1                               | 1                    | 0                    |
| 2                               | 1                    | 0                    |
| 3                               | 1                    | 0                    |
| 4                               | 1                    | 0                    |
| 5                               | 1                    | 0                    |
| 6                               | 1                    | 0                    |
| 7                               | 1                    | 0                    |
| 8                               | 1                    | 0                    |
| 9                               | 1                    | 0                    |
| 10                              | 1                    | 0                    |
| 11                              | 1                    | 0                    |

For  $n \geq 1$

$$e_n(u_2) = 5r_2(n-1; 4, 10) + 11r_2(n-2; 4, 10) + 16r_2(n-3; 4, 10) + 15r_2(n-4; 4, 10) + 22r_2(n-5; 4, 10) + \\ + 22r_2(n-6; 4, 10) + 22r_2(n-7; 4, 10) + 22r_2(n-8; 4, 10) + 22r_2(n-9; 4, 10) + 15r_2(n-10; 4, 10) + \\ + 16r_2(n-11; 4, 10) + 11r_2(n-12; 4, 10) + 5r_2(n-13; 4, 10) + 12r_2(n-14; 4, 10) + r_1(n; 4) + r_1(n; 8).$$

$$\text{For } n \geq 1 \quad e_n(u_2) = \begin{cases} \frac{27n}{5}, n \equiv 0, 5, 10, 15 \pmod{20} \\ \frac{27n+1}{5}, n \equiv 2, 7, 12, 17 \pmod{20} \\ \frac{27n-1}{5}, n \equiv 3, 8, 13, 18 \pmod{20} \\ \frac{27n+2}{5}, n \equiv 9, 19 \pmod{20} \end{cases}, \quad e_n(u_2) = \begin{cases} \frac{27n-2}{5}, n \equiv 1, 11 \pmod{20} \\ \frac{27n+3}{5}, n \equiv 6, 16 \pmod{20} \\ \frac{27n-3}{5}, n \equiv 4, 14 \pmod{20} \end{cases}.$$



| krb                                                                                | Plane group                             | $a$                           | $b$    | $\gamma, ^\circ$   |                                 |
|------------------------------------------------------------------------------------|-----------------------------------------|-------------------------------|--------|--------------------|---------------------------------|
| 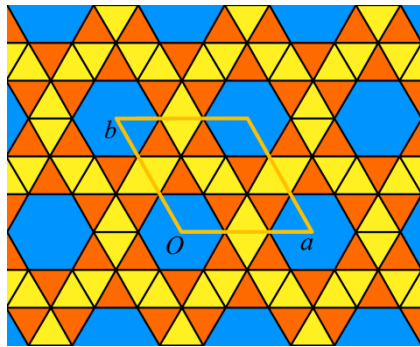  | $p6mm$                                  | 3.0000                        | 3.0000 | 120                |                                 |
|                                                                                    |                                         |                               |        |                    |                                 |
|                                                                                    | Vertex                                  | CN                            | $x$    | $y$                |                                 |
|                                                                                    | $u_1$                                   | 6                             | 0.3333 | 0.6667             |                                 |
|                                                                                    | $u_2$                                   | 5                             | 0.0000 | 0.3333             |                                 |
|                                                                                    |                                         |                               |        |                    |                                 |
| Growth polygon                                                                     | Number of the growth polygon vertex $i$ | Vertex fractional coordinates |        | $\alpha_i, ^\circ$ | Length of the ray $d(\Gamma_i)$ |
|  | 0                                       | 1/3                           | 0      | 0                  | 3                               |
|                                                                                    | 1                                       | 1/3                           | 1/3    | 60                 | 3                               |
|                                                                                    | 2                                       | 0                             | 1/3    | 120                | 3                               |
|                                                                                    | 3                                       | -1/3                          | 0      | 180                | 3                               |
|                                                                                    | 4                                       | -1/3                          | -1/3   | 240                | 3                               |
|                                                                                    | 5                                       | 0                             | -1/3   | 300                | 3                               |

### Vertex $u_1$

Tab. 1: Values of  $\sigma_{i,k}$  and  $d(x, x_i)$

| Number of the sector, $i$ | $k$ |   |   |   |   |   | $d(x, x_i)$ |
|---------------------------|-----|---|---|---|---|---|-------------|
|                           | 1   | 2 | 3 | 4 | 5 | 6 |             |
| 0                         | 0   | 0 | 2 | 3 | 2 | 1 | 0           |
| 1                         | 0   | 1 | 2 | 2 | 2 | 1 | 0           |
| 2                         | 0   | 0 | 2 | 3 | 2 | 1 | 0           |
| 3                         | 0   | 1 | 2 | 2 | 2 | 1 | 0           |
| 4                         | 0   | 0 | 2 | 3 | 2 | 1 | 0           |
| 5                         | 0   | 1 | 2 | 2 | 2 | 1 | 0           |

Tab. 2: Values of  $\delta_{i,k}^{(1)}$  and  $\delta_{i,k}^{(2)}$ .

| Number of the sector, $i$ | $\delta_{i,k}^{(1)}$ |   |   | $\delta_{i,k}^{(2)}$ |   |   |
|---------------------------|----------------------|---|---|----------------------|---|---|
|                           | $k$                  |   |   | $k$                  |   |   |
|                           | 0                    | 1 | 2 | 0                    | 1 | 2 |
| 0                         | 1                    | 1 | 1 | 0                    | 0 | 0 |
| 1                         | 1                    | 1 | 1 | 0                    | 0 | 0 |
| 2                         | 1                    | 1 | 1 | 0                    | 0 | 0 |
| 3                         | 1                    | 1 | 1 | 0                    | 0 | 0 |
| 4                         | 1                    | 1 | 1 | 0                    | 0 | 0 |
| 5                         | 1                    | 1 | 1 | 0                    | 0 | 0 |

For  $n \geq 1$

$$e_n(u_1) = 3r_2(n-2; 3, 3) + 12r_2(n-3; 3, 3) + 15r_2(n-4; 3, 3) + 12r_2(n-5; 3, 3) + 6r_2(n-6; 3, 3) + 6r_1(n; 3) + 6r_1(n-1; 3) + 6r_1(n-2; 3).$$

$$\text{For } n \geq 1 \quad e_n(u_1) = \begin{cases} 6n, n \equiv 0(\text{mod } 3) \\ 5n+1, n \equiv 1(\text{mod } 3) \\ 5n-1, n \equiv 2(\text{mod } 3) \end{cases}.$$

### Vertex $u_2$

Tab. 1: Values of  $\sigma_{i,k}$  and  $d(x, x_i)$

| Number of the sector, $i$ | $k$ |   |   |   |   |   | $d(x, x_i)$ |
|---------------------------|-----|---|---|---|---|---|-------------|
|                           | 1   | 2 | 3 | 4 | 5 | 6 |             |
| 0                         | 0   | 1 | 1 | 3 | 2 | 1 | 0           |
| 1                         | 0   | 1 | 2 | 2 | 2 | 1 | 1           |
| 2                         | 0   | 1 | 2 | 2 | 2 | 1 | 1           |
| 3                         | 0   | 1 | 1 | 3 | 2 | 1 | 0           |
| 4                         | 0   | 1 | 1 | 3 | 2 | 1 | 1           |
| 5                         | 0   | 1 | 2 | 2 | 2 | 1 | 3           |

Tab. 2: Values of  $\delta_{i,k}^{(1)}$  and  $\delta_{i,k}^{(2)}$ .

| Number of the sector, $i$ | $\delta_{i,k}^{(1)}$ |   |   |   |   |   | $\delta_{i,k}^{(2)}$ |   |   |   |   |   |
|---------------------------|----------------------|---|---|---|---|---|----------------------|---|---|---|---|---|
|                           | $k$                  |   |   |   |   |   | $k$                  |   |   |   |   |   |
|                           | 0                    | 1 | 2 | 3 | 4 | 5 | 0                    | 1 | 2 | 3 | 4 | 5 |
| 0                         | 1                    | 1 | 2 | 1 | 1 | 1 | 1                    | 0 | 0 | 0 | 0 | 0 |
| 1                         | 1                    | 1 | 1 | 0 | 0 | 0 | 0                    | 0 | 0 | 0 | 0 | 0 |
| 2                         | 1                    | 1 | 1 | 1 | 1 | 0 | 1                    | 1 | 1 | 0 | 0 | 0 |
| 3                         | 1                    | 1 | 1 | 0 | 0 | 0 | 0                    | 0 | 0 | 0 | 0 | 0 |
| 4                         | 1                    | 1 | 1 | 0 | 0 | 0 | 0                    | 0 | 0 | 0 | 0 | 0 |
| 5                         | 1                    | 2 | 1 | 0 | 0 | 0 | 1                    | 1 | 2 | 0 | 0 | 0 |

For  $n \geq 4$

$$e(u_2, n) = 2r_2(n-2; 3, 3) + 5r_2(n-3; 3, 3) + 11r_2(n-4; 3, 3) + 12r_2(n-5; 3, 3) + 10r_2(n-6; 3, 3) + 5r_2(n-7; 3, 3) + 2r_2(n-8; 3, 3) + r_2(n-9; 3, 3) + 11r_1(n; 3) + 11r_1(n-1; 3) + 11r_1(n-2; 3).$$

$$\text{For } n \geq 4 \quad e_n(u_2) = \begin{cases} \frac{16n-3}{3}, n \equiv 0(\text{mod } 3) \\ \frac{16n+2}{3}, n \equiv 1(\text{mod } 3) \\ \frac{16n+1}{3}, n \equiv 2(\text{mod } 3) \end{cases}.$$

| krc                                                                                | Plane group                             | $a$                           | $b$    | $\gamma, ^\circ$   |                                 |
|------------------------------------------------------------------------------------|-----------------------------------------|-------------------------------|--------|--------------------|---------------------------------|
| 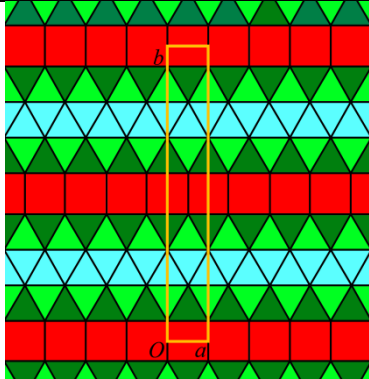  | $c2mm$                                  | 1.0000                        | 7.1962 | 90                 |                                 |
|                                                                                    |                                         |                               |        |                    |                                 |
|                                                                                    | Vertex                                  | CN                            | $x$    | $y$                |                                 |
|                                                                                    | $u_1$                                   | 6                             | 0      | 0.3102             |                                 |
|                                                                                    | $u_2$                                   | 5                             | 0      | 0.0695             |                                 |
|                                                                                    |                                         |                               |        |                    |                                 |
| Growth polygon                                                                     | Number of the growth polygon vertex $i$ | Vertex fractional coordinates |        | $\alpha_i, ^\circ$ | Length of the ray $d(\Gamma_i)$ |
|  | 0                                       | 1                             | 0      | 0                  | 1                               |
|                                                                                    | 1                                       | 3/8                           | 1/8    | 67.369             | 8                               |
|                                                                                    | 2                                       | -3/8                          | 1/8    | 112.631            | 8                               |
|                                                                                    | 3                                       | -1                            | 0      | 180                | 1                               |
|                                                                                    | 4                                       | -3/8                          | -1/8   | 247.369            | 8                               |
|                                                                                    | 5                                       | 3/8                           | -1/8   | 292.631            | 8                               |

### Vertex $u_1$

Tab. 1: Values of  $\sigma_{i,k}$  and  $d(x, x_i)$

| Number of the sector, $i$ | $k$ |   |   |   |   |   |   |   |   |    |    |    |    |    |    |    | $d(x, x_i)$ |
|---------------------------|-----|---|---|---|---|---|---|---|---|----|----|----|----|----|----|----|-------------|
|                           | 1   | 2 | 3 | 4 | 5 | 6 | 7 | 8 | 9 | 10 | 11 | 12 | 13 | 14 | 15 | 16 |             |
| 0                         | 1   | 0 | 1 | 1 | 2 | 0 | 1 | 1 | 1 | 0  | 0  | 0  | 0  | 0  | 0  | 0  | 0           |
| 1                         | 0   | 2 | 3 | 2 | 3 | 5 | 6 | 5 | 6 | 4  | 3  | 4  | 3  | 1  | 0  | 1  | 0           |
| 2                         | 1   | 0 | 1 | 1 | 2 | 0 | 1 | 1 | 1 | 0  | 0  | 0  | 0  | 0  | 0  | 0  | 0           |
| 3                         | 1   | 1 | 0 | 1 | 2 | 1 | 0 | 1 | 1 | 0  | 0  | 0  | 0  | 0  | 0  | 0  | 0           |
| 4                         | 0   | 1 | 3 | 2 | 3 | 4 | 6 | 5 | 6 | 5  | 3  | 4  | 3  | 2  | 0  | 1  | 0           |
| 5                         | 1   | 1 | 0 | 1 | 2 | 1 | 0 | 1 | 1 | 0  | 0  | 0  | 0  | 0  | 0  | 0  | 0           |

Tab. 2: Values of  $\delta_{i,k}^{(1)}$  and  $\delta_{i,k}^{(2)}$ .

| Number of the sector, $i$ | $\delta_{i,k}^{(1)}$ |   |   |   |   | $\delta_{i,k}^{(2)}$ |   |   |   |   |
|---------------------------|----------------------|---|---|---|---|----------------------|---|---|---|---|
|                           | $k$                  |   |   |   |   | $k$                  |   |   |   |   |
|                           | 0                    | 1 | 2 | 3 | 4 | 0                    | 1 | 2 | 3 | 4 |
| 0                         | 1                    | 0 | 0 | 0 | 0 | 0                    | 0 | 0 | 0 | 0 |
| 1                         | 1                    | 0 | 0 | 0 | 1 | 0                    | 0 | 0 | 0 | 0 |
| 2                         | 1                    | 0 | 0 | 0 | 1 | 0                    | 0 | 0 | 0 | 0 |
| 3                         | 1                    | 0 | 0 | 0 | 0 | 0                    | 0 | 0 | 0 | 0 |
| 4                         | 1                    | 0 | 0 | 0 | 1 | 0                    | 0 | 0 | 0 | 0 |
| 5                         | 1                    | 0 | 0 | 0 | 1 | 0                    | 0 | 0 | 0 | 0 |

For  $n \geq 1$

$$e_n(u_1) = 4r_2(n-1;1,8) + 2r_2(n-2;1,8) + 2r_2(n-3;1,8) + 4r_2(n-4;1,8) + 8r_2(n-5;1,8) + 2r_2(n-6;1,8) + \\ + 2r_2(n-7;1,8) + 4r_2(n-8;1,8) + 4r_2(n-9;1,8) + 3r_2(n-2;8,8) + 6r_2(n-3;8,8) + 4r_2(n-4;8,8) + \\ + 6r_2(n-5;8,8) + 9r_2(n-6;8,8) + 12r_2(n-7;8,8) + 10r_2(n-8;8,8) + 12r_2(n-9;8,8) + 9r_2(n-10;8,8) + \\ + 6r_2(n-11;8,8) + 8r_2(n-12;8,8) + 6r_2(n-13;8,8) + 3r_2(n-14;8,8) + 2r_2(n-16;8,8) + \\ + 2r_1(n;1) + 4r_1(n;8) + 4r_1(n-4;8).$$

$$\text{For } n \geq 1 \quad e_n(u_1) = \begin{cases} \frac{11n}{2}, n \equiv 0, 2, 4, 6(\text{mod } 8) \\ \frac{11n+1}{2}, n \equiv 1, 5(\text{mod } 8) \\ \frac{11n-1}{2}, n \equiv 3, 7(\text{mod } 8) \end{cases}.$$

**Vertex  $u_2$**

Tab. 1: Values of  $\sigma_{i,k}$  and  $d(x, x_i)$

| Number of the sector, $i$ | $k$ |   |   |   |   |   |   |   |   |    |    |    |    |    |    |    | $d(x, x_i)$ |
|---------------------------|-----|---|---|---|---|---|---|---|---|----|----|----|----|----|----|----|-------------|
|                           | 1   | 2 | 3 | 4 | 5 | 6 | 7 | 8 | 9 | 10 | 11 | 12 | 13 | 14 | 15 | 16 |             |
| 0                         | 1   | 1 | 1 | 0 | 2 | 1 | 1 | 0 | 1 | 0  | 0  | 0  | 0  | 0  | 0  | 0  | 0           |
| 1                         | 0   | 1 | 2 | 2 | 3 | 4 | 5 | 5 | 6 | 5  | 4  | 4  | 3  | 2  | 1  | 1  | 0           |
| 2                         | 1   | 1 | 1 | 0 | 2 | 1 | 1 | 0 | 1 | 0  | 0  | 0  | 0  | 0  | 0  | 0  | 0           |
| 3                         | 0   | 1 | 1 | 1 | 1 | 1 | 1 | 1 | 1 | 0  | 0  | 0  | 0  | 0  | 0  | 0  | 0           |
| 4                         | 1   | 2 | 3 | 2 | 4 | 5 | 6 | 5 | 5 | 4  | 3  | 4  | 2  | 1  | 0  | 1  | 0           |
| 5                         | 0   | 1 | 1 | 1 | 1 | 1 | 1 | 1 | 1 | 0  | 0  | 0  | 0  | 0  | 0  | 0  | 0           |

Tab. 2: Values of  $\delta_{i,k}^{(1)}$  and  $\delta_{i,k}^{(2)}$ .

| Number of the sector, $i$ | $\delta_{i,k}^{(1)}$ |   |   |   |   | $\delta_{i,k}^{(2)}$ |   |   |   |   |
|---------------------------|----------------------|---|---|---|---|----------------------|---|---|---|---|
|                           | $k$                  |   |   |   |   | $k$                  |   |   |   |   |
|                           | 0                    | 1 | 2 | 3 | 4 | 0                    | 1 | 2 | 3 | 4 |
| 0                         | 1                    | 0 | 0 | 0 | 0 | 0                    | 0 | 0 | 0 | 0 |
| 1                         | 1                    | 0 | 0 | 0 | 1 | 0                    | 0 | 0 | 0 | 0 |
| 2                         | 1                    | 0 | 0 | 0 | 1 | 0                    | 0 | 0 | 0 | 0 |
| 3                         | 1                    | 0 | 0 | 0 | 0 | 0                    | 0 | 0 | 0 | 0 |
| 4                         | 1                    | 0 | 0 | 0 | 1 | 0                    | 0 | 0 | 0 | 0 |
| 5                         | 1                    | 0 | 0 | 0 | 1 | 0                    | 0 | 0 | 0 | 0 |

For  $n \geq 1$

$$e_n(u_2) = 2r_2(n-1;1,8) + 4r_2(n-2;1,8) + 4r_2(n-3;1,8) + 2r_2(n-4;1,8) + 6r_2(n-5;1,8) + 4r_2(n-6;1,8) + \\ + 4r_2(n-7;1,8) + 2r_2(n-8;1,8) + 4r_2(n-9;1,8) + r_2(n-1;8,8) + 3r_2(n-2;8,8) + 5r_2(n-3;8,8) + \\ + 4r_2(n-4;8,8) + 7r_2(n-5;8,8) + 9r_2(n-6;8,8) + 11r_2(n-7;8,8) + 10r_2(n-8;8,8) + 11r_2(n-9;8,8) + \\ + 9r_2(n-10;8,8) + 7r_2(n-11;8,8) + 8r_2(n-12;8,8) + 5r_2(n-13;8,8) + 3r_2(n-14;8,8) + \\ + r_2(n-15;8,8) + 2r_2(n-16;8,8) + 2r_1(n;1) + 4r_1(n;8) + 4r_1(n-4;8).$$

$$\text{For } n \geq 1 \quad e_n(u_1) = \begin{cases} \frac{11n}{2}, n \equiv 0, 2, 4, 6(\text{mod } 8) \\ \frac{11n-1}{2}, n \equiv 1, 5(\text{mod } 8) \\ \frac{11n+1}{2}, n \equiv 3, 7(\text{mod } 8) \end{cases}.$$

| krd                                                                                | Plane group                             | $a$                           | $b$    | $\gamma, ^\circ$   |                                 |
|------------------------------------------------------------------------------------|-----------------------------------------|-------------------------------|--------|--------------------|---------------------------------|
| 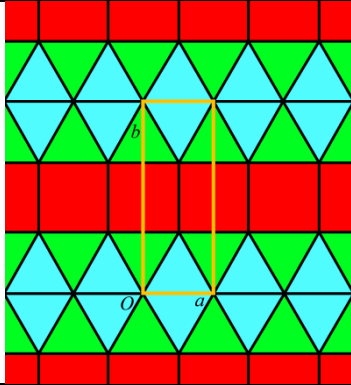  | $P2mm$                                  | 1.0000                        | 2.7320 | 90                 |                                 |
|                                                                                    |                                         |                               |        |                    |                                 |
|                                                                                    | Vertex                                  | CN                            | $x$    | $y$                |                                 |
|                                                                                    | $u_1$                                   | 6                             | 0      | 0                  |                                 |
|                                                                                    | $u_2$                                   | 5                             | 0.5    | 0.3170             |                                 |
|                                                                                    |                                         |                               |        |                    |                                 |
| Growth polygon                                                                     | Number of the growth polygon vertex $i$ | Vertex fractional coordinates |        | $\alpha_i, ^\circ$ | Length of the ray $d(\Gamma_i)$ |
|  | 0                                       | 1                             | 0      | 0                  | 1                               |
|                                                                                    | 1                                       | 1/3                           | 1/3    | 69.896             | 3                               |
|                                                                                    | 2                                       | -1/3                          | 1/3    | 110.104            | 3                               |
|                                                                                    | 3                                       | -1                            | 0      | 180                | 1                               |
|                                                                                    | 4                                       | -1/3                          | -1/3   | 249.896            | 3                               |
|                                                                                    | 5                                       | 1/3                           | -1/3   | 290.104            | 3                               |

### Vertex $u_1$

Tab. 1: Values of  $\sigma_{i,k}$  and  $d(x, x_i)$

| Number of the sector, $i$ | $k$ |   |   |   |   |   | $d(x, x_i)$ |
|---------------------------|-----|---|---|---|---|---|-------------|
|                           | 1   | 2 | 3 | 4 | 5 | 6 |             |
| 0                         | 1   | 0 | 1 | 1 | 0 | 0 | 0           |
| 1                         | 0   | 2 | 1 | 2 | 0 | 1 | 0           |
| 2                         | 1   | 0 | 1 | 1 | 0 | 0 | 0           |
| 3                         | 1   | 0 | 1 | 1 | 0 | 0 | 0           |
| 4                         | 0   | 2 | 1 | 2 | 0 | 1 | 0           |
| 5                         | 1   | 0 | 1 | 1 | 0 | 0 | 0           |

Tab. 2: Values of  $\delta_{i,k}^{(1)}$  and  $\delta_{i,k}^{(2)}$ .

| Number of the sector, $i$ | $\delta_{i,k}^{(1)}$ | $\delta_{i,k}^{(2)}$ |
|---------------------------|----------------------|----------------------|
|                           | $k$                  | $k$                  |
|                           | 0                    | 0                    |
| 0                         | 1                    | 0                    |
| 1                         | 1                    | 0                    |
| 2                         | 1                    | 0                    |
| 3                         | 1                    | 0                    |
| 4                         | 1                    | 0                    |
| 5                         | 1                    | 0                    |

For  $n \geq 1$

$$e_n(u_1) = 4r_2(n-1;1,3) + 4r_2(n-3;1,3) + 4r_2(n-4;1,3) + 4r_2(n-2;3,3) + 2r_2(n-3;3,3) + 4r_2(n-4;3,3) + 2r_2(n-6;3,3) + 2r_1(n;1) + 4r_1(n;3).$$

$$\text{For } n \geq 1 \quad e_n(u_1) = \begin{cases} \frac{16n}{3}, n \equiv 0(\text{mod } 3) \\ \frac{16n+2}{3}, n \equiv 1(\text{mod } 3) \\ \frac{16n-2}{3}, n \equiv 2(\text{mod } 3) \end{cases}.$$

### Vertex $u_2$

Tab. 1: Values of  $\sigma_{i,k}$  and  $d(x, x_i)$

| Number of the sector, $i$ | $k$ |   |   |   |   |   | $d(x, x_i)$ |
|---------------------------|-----|---|---|---|---|---|-------------|
|                           | 1   | 2 | 3 | 4 | 5 | 6 |             |
| 0                         | 0   | 1 | 1 | 1 | 0 | 0 | 0           |
| 1                         | 1   | 2 | 1 | 1 | 0 | 1 | 0           |
| 2                         | 0   | 1 | 1 | 1 | 0 | 0 | 0           |
| 3                         | 1   | 1 | 0 | 1 | 0 | 0 | 0           |
| 4                         | 0   | 1 | 1 | 2 | 1 | 1 | 0           |
| 5                         | 1   | 1 | 0 | 1 | 0 | 0 | 0           |

Tab. 2: Values of  $\delta_{i,k}^{(1)}$  and  $\delta_{i,k}^{(2)}$

| Number of the sector, $i$ | $\delta_{i,k}^{(1)}$ | $\delta_{i,k}^{(2)}$ |
|---------------------------|----------------------|----------------------|
|                           | $k$                  | $k$                  |
|                           | 0                    | 0                    |
| 0                         | 1                    | 0                    |
| 1                         | 1                    | 0                    |
| 2                         | 1                    | 0                    |
| 3                         | 1                    | 0                    |
| 4                         | 1                    | 0                    |
| 5                         | 1                    | 0                    |

For  $n \geq 1$

$$e_n(u_2) = 2r_2(n-1;1,3) + 4r_2(n-2;1,3) + 2r_2(n-3;1,3) + 4r_2(n-4;1,3) + r_2(n-1;3,3) + 3r_2(n-2;3,3) + 2r_2(n-3;3,3) + 3r_2(n-4;3,3) + r_2(n-5;3,3) + 2r_2(n-6;3,3) + 2r_1(n;1) + 4r_1(n;3).$$

$$\text{For } n \geq 1 \quad e_n(u_2) = \begin{cases} \frac{16n}{3}, n \equiv 0(\text{mod } 3) \\ \frac{16n-1}{3}, n \equiv 1(\text{mod } 3) \\ \frac{16n+1}{3}, n \equiv 2(\text{mod } 3) \end{cases}.$$

| kre                                                                                |        | Plane group                             | $a$                           | $b$    | $\gamma, ^\circ$   |                                 |
|------------------------------------------------------------------------------------|--------|-----------------------------------------|-------------------------------|--------|--------------------|---------------------------------|
| 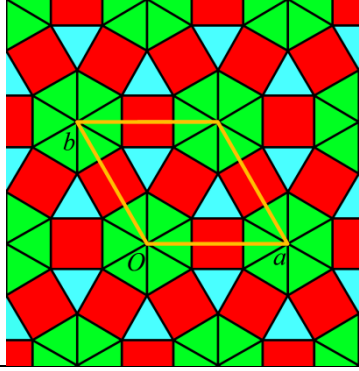  | $p6mm$ | 2.7321                                  | 2.7321                        | 120    |                    |                                 |
|                                                                                    |        |                                         |                               |        |                    |                                 |
|                                                                                    | Vertex | CN                                      | $x$                           | $y$    |                    |                                 |
|                                                                                    | $u_1$  | 6                                       | 0                             | 0      |                    |                                 |
|                                                                                    | $u_2$  | 5                                       | 0.2113                        | 0.4226 |                    |                                 |
|                                                                                    |        |                                         |                               |        |                    |                                 |
| Growth polygon                                                                     |        | Number of the growth polygon vertex $i$ | Vertex fractional coordinates |        | $\alpha_i, ^\circ$ | Length of the ray $d(\Gamma_i)$ |
|  | 0      | 1/3                                     | 0                             | 0      | 3                  |                                 |
|                                                                                    | 1      | 2/5                                     | 1/5                           | 30     | 5                  |                                 |
|                                                                                    | 2      | 1/3                                     | 1/3                           | 60     | 3                  |                                 |
|                                                                                    | 3      | 1/5                                     | 2/5                           | 90     | 5                  |                                 |
|                                                                                    | 4      | 0                                       | 1/3                           | 120    | 3                  |                                 |
|                                                                                    | 5      | -1/5                                    | 1/5                           | 150    | 5                  |                                 |
|                                                                                    | 6      | -1/3                                    | 0                             | 180    | 3                  |                                 |
|                                                                                    | 7      | -2/5                                    | -1/5                          | 210    | 5                  |                                 |
|                                                                                    | 8      | -1/3                                    | -1/3                          | 240    | 3                  |                                 |
|                                                                                    | 9      | -1/5                                    | -2/5                          | 270    | 5                  |                                 |
|                                                                                    | 10     | 0                                       | -1/3                          | 300    | 3                  |                                 |
|                                                                                    | 11     | 1/5                                     | -1/5                          | 330    | 5                  |                                 |

### Vertex $u_1$

Tab. 1: Values of  $\sigma_{i,k}$  and  $d(x, x_i)$

| Number of the sector, $i$ | $k$ |   |   |   |   |   |   |   | $d(x, x_i)$ |
|---------------------------|-----|---|---|---|---|---|---|---|-------------|
|                           | 1   | 2 | 3 | 4 | 5 | 6 | 7 | 8 |             |
| 0                         | 0   | 1 | 1 | 1 | 1 | 1 | 1 | 1 | 0           |
| 1                         | 0   | 1 | 1 | 1 | 1 | 1 | 1 | 1 | 0           |
| 2                         | 0   | 1 | 1 | 1 | 1 | 1 | 1 | 1 | 0           |
| 3                         | 0   | 1 | 1 | 1 | 1 | 1 | 1 | 1 | 0           |
| 4                         | 0   | 1 | 1 | 1 | 1 | 1 | 1 | 1 | 0           |
| 5                         | 0   | 1 | 1 | 1 | 1 | 1 | 1 | 1 | 0           |
| 6                         | 0   | 1 | 1 | 1 | 1 | 1 | 1 | 1 | 0           |
| 7                         | 0   | 1 | 1 | 1 | 1 | 1 | 1 | 1 | 0           |
| 8                         | 0   | 1 | 1 | 1 | 1 | 1 | 1 | 1 | 0           |
| 9                         | 0   | 1 | 1 | 1 | 1 | 1 | 1 | 1 | 0           |
| 10                        | 0   | 1 | 1 | 1 | 1 | 1 | 1 | 1 | 0           |
| 11                        | 0   | 1 | 1 | 1 | 1 | 1 | 1 | 1 | 0           |

Tab. 2: Values of  $\delta_{i,k}^{(1)}$  and  $\delta_{i,k}^{(2)}$ .

| Number of the sector, $i$ | $\delta_{i,k}^{(1)}$ |   |   |   |   | $\delta_{i,k}^{(2)}$ |   |   |   |   |
|---------------------------|----------------------|---|---|---|---|----------------------|---|---|---|---|
|                           | $k$                  |   |   |   |   | $k$                  |   |   |   |   |
|                           | 0                    | 1 | 2 | 3 | 4 | 0                    | 1 | 2 | 3 | 4 |

|    |   |   |   |   |   |   |   |   |   |   |
|----|---|---|---|---|---|---|---|---|---|---|
| 0  | 1 | 0 | 0 | 0 | 0 | 0 | 0 | 0 | 0 | 0 |
| 1  | 1 | 1 | 0 | 0 | 1 | 0 | 0 | 0 | 0 | 0 |
| 2  | 1 | 0 | 0 | 0 | 0 | 0 | 0 | 0 | 0 | 0 |
| 3  | 1 | 1 | 0 | 0 | 1 | 0 | 0 | 0 | 0 | 0 |
| 4  | 1 | 0 | 0 | 0 | 0 | 0 | 0 | 0 | 0 | 0 |
| 5  | 1 | 1 | 0 | 0 | 1 | 0 | 0 | 0 | 0 | 0 |
| 6  | 1 | 0 | 0 | 0 | 0 | 0 | 0 | 0 | 0 | 0 |
| 7  | 1 | 1 | 0 | 0 | 1 | 0 | 0 | 0 | 0 | 0 |
| 8  | 1 | 0 | 0 | 0 | 0 | 0 | 0 | 0 | 0 | 0 |
| 9  | 1 | 1 | 0 | 0 | 1 | 0 | 0 | 0 | 0 | 0 |
| 10 | 1 | 0 | 0 | 0 | 0 | 0 | 0 | 0 | 0 | 0 |
| 11 | 1 | 1 | 0 | 0 | 1 | 0 | 0 | 0 | 0 | 0 |

For  $n \geq 1$

$$e_n(u_1) = 12r_2(n-2;3,5) + 12r_2(n-3;3,5) + 12r_2(n-4;3,5) + 12r_2(n-5;3,5) + 12r_2(n-6;3,5) + 12r_2(n-7;3,5) + \\ + 12r_2(n-8;3,5) + 6r_1(n;3) + 6r_1(n;5) + 6r_1(n-1;5) + 6r_1(n-4;5).$$

$$e_n(u_1) = \begin{cases} \frac{28n}{5}, n \equiv 0(\text{mod } 15) \\ \frac{28n+2}{5}, n \equiv 1(\text{mod } 15) \\ \frac{28n+4}{5}, n \equiv 2(\text{mod } 15) \\ \frac{28n+6}{5}, n \equiv 3(\text{mod } 15) \\ \frac{28n-22}{5}, n \equiv 4(\text{mod } 15) \end{cases}, e_n(u_1) = \begin{cases} \frac{28n+10}{5}, n \equiv 5(\text{mod } 15) \\ \frac{28n+12}{5}, n \equiv 6(\text{mod } 15) \\ \frac{28n-16}{5}, n \equiv 7(\text{mod } 15) \\ \frac{28n+16}{5}, n \equiv 8(\text{mod } 15) \\ \frac{28n-12}{5}, n \equiv 9(\text{mod } 15) \end{cases}, e_n(u_1) = \begin{cases} \frac{28n-10}{5}, n \equiv 10(\text{mod } 15) \\ \frac{28n+22}{5}, n \equiv 11(\text{mod } 15) \\ \frac{28n-6}{5}, n \equiv 12(\text{mod } 15) \\ \frac{28n-4}{5}, n \equiv 13(\text{mod } 15) \\ \frac{28n-2}{5}, n \equiv 14(\text{mod } 15) \end{cases}.$$

**Vertex  $u_2$**

Tab. 1: Values of  $\sigma_{i,k}$  and  $d(x, x_i)$

| Number of the<br>sector, $i$ | $k$ |   |   |   |   |   |   |   | $d(x, x_i)$ |
|------------------------------|-----|---|---|---|---|---|---|---|-------------|
|                              | 1   | 2 | 3 | 4 | 5 | 6 | 7 | 8 |             |
| 0                            | 0   | 1 | 1 | 1 | 1 | 1 | 1 | 1 | 0           |
| 1                            | 0   | 1 | 1 | 1 | 1 | 1 | 1 | 1 | 0           |
| 2                            | 0   | 1 | 0 | 1 | 1 | 2 | 1 | 1 | 0           |
| 3                            | 0   | 1 | 0 | 1 | 1 | 2 | 1 | 1 | 0           |
| 4                            | 0   | 1 | 1 | 1 | 1 | 1 | 1 | 1 | 0           |
| 5                            | 0   | 1 | 1 | 1 | 1 | 1 | 1 | 1 | 0           |
| 6                            | 0   | 1 | 1 | 2 | 1 | 1 | 0 | 1 | 0           |
| 7                            | 0   | 0 | 1 | 2 | 1 | 1 | 1 | 1 | 0           |
| 8                            | 0   | 0 | 1 | 2 | 1 | 1 | 1 | 1 | 0           |
| 9                            | 0   | 0 | 1 | 2 | 1 | 1 | 1 | 1 | 0           |
| 10                           | 0   | 0 | 1 | 2 | 1 | 1 | 1 | 1 | 0           |
| 11                           | 0   | 1 | 1 | 2 | 1 | 1 | 0 | 1 | 0           |



Tab. 2: Values of  $\delta_{i,k}^{(1)}$  and  $\delta_{i,k}^{(2)}$ .

| Number<br>of the<br>sector, $i$ | $\delta_{i,k}^{(1)}$ |   |   |   |   | $\delta_{i,k}^{(2)}$ |   |   |   |   |
|---------------------------------|----------------------|---|---|---|---|----------------------|---|---|---|---|
|                                 | $k$                  |   |   |   |   | $k$                  |   |   |   |   |
|                                 | 0                    | 1 | 2 | 3 | 4 | 0                    | 1 | 2 | 3 | 4 |
| 0                               | 1                    | 0 | 0 | 0 | 0 | 0                    | 0 | 0 | 0 | 0 |
| 1                               | 1                    | 0 | 0 | 0 | 1 | 0                    | 0 | 0 | 0 | 0 |
| 2                               | 1                    | 1 | 0 | 0 | 0 | 0                    | 0 | 0 | 0 | 0 |
| 3                               | 1                    | 0 | 0 | 1 | 1 | 0                    | 0 | 0 | 0 | 0 |
| 4                               | 1                    | 1 | 0 | 0 | 0 | 0                    | 0 | 0 | 0 | 0 |
| 5                               | 1                    | 0 | 0 | 0 | 1 | 0                    | 0 | 0 | 0 | 0 |
| 6                               | 1                    | 0 | 0 | 0 | 0 | 0                    | 0 | 0 | 0 | 0 |
| 7                               | 1                    | 1 | 0 | 0 | 0 | 0                    | 0 | 0 | 0 | 0 |
| 8                               | 1                    | 0 | 1 | 0 | 0 | 0                    | 0 | 0 | 0 | 0 |
| 9                               | 1                    | 1 | 1 | 0 | 0 | 0                    | 0 | 0 | 0 | 0 |
| 10                              | 1                    | 0 | 1 | 0 | 0 | 0                    | 0 | 0 | 0 | 0 |
| 11                              | 1                    | 1 | 0 | 0 | 0 | 0                    | 0 | 0 | 0 | 0 |

For  $n \geq 1$

$$e_n(u_2) = 8r_2(n-2;3,5) + 10r_2(n-3;3,5) + 18r_2(n-4;3,5) + 12r_2(n-5;3,5) + 14r_2(n-6;3,5) + \\ + 10r_2(n-7;3,5) + 12r_2(n-8;3,5) + 6r_1(n;3) + 2r_1(n-1;3) + 2r_1(n-2;3) + 6r_1(n;5) + 3r_1(n-1;5) + \\ + r_1(n-2;5) + r_1(n-3;5) + 3r_1(n-4;5).$$

$$\text{For } n \geq 1 \quad e_n(u_2) = \begin{cases} \frac{28n}{5}, n \equiv 0, 5, 10 \pmod{15} \\ \frac{28n-3}{5}, n \equiv 1, 6, 11 \pmod{15} \\ \frac{28n-1}{5}, n \equiv 2, 7, 12 \pmod{15} \end{cases}, \quad e_n(u_2) = \begin{cases} \frac{28n+1}{5}, n \equiv 3, 8, 13 \pmod{15} \\ \frac{28n+3}{5}, n \equiv 4, 9, 14 \pmod{15} \end{cases}.$$

| krf                                                                                | Plane group                             | $a$                           | $b$    | $\gamma, ^\circ$   |                                 |
|------------------------------------------------------------------------------------|-----------------------------------------|-------------------------------|--------|--------------------|---------------------------------|
| 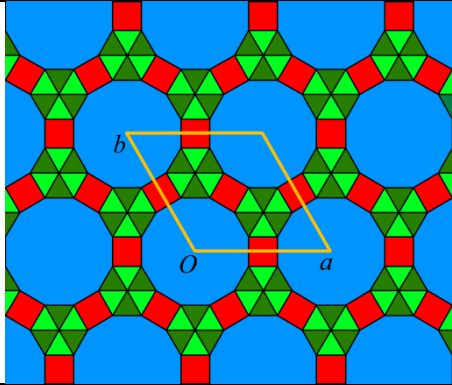  | $p6mm$                                  | 4.7321                        | 4.7321 | 120                |                                 |
|                                                                                    |                                         |                               |        |                    |                                 |
|                                                                                    | Vertex                                  | CN                            | $x$    | $y$                |                                 |
|                                                                                    | $u_1$                                   | 6                             | 0.3333 | 0.6667             |                                 |
|                                                                                    | $u_2$                                   | 4                             | 0.1220 | 0.4553             |                                 |
|                                                                                    |                                         |                               |        |                    |                                 |
| Growth polygon                                                                     | Number of the growth polygon vertex $i$ | Vertex fractional coordinates |        | $\alpha_i, ^\circ$ | Length of the ray $d(\Gamma_i)$ |
|  | 0                                       | $1/5$                         | 0      | 0                  | 5                               |
|                                                                                    | 1                                       | $1/5$                         | $1/5$  | 60                 | 5                               |
|                                                                                    | 2                                       | 0                             | $1/5$  | 120                | 5                               |
|                                                                                    | 3                                       | $-1/5$                        | 0      | 180                | 5                               |
|                                                                                    | 4                                       | $-1/5$                        | $-1/5$ | 240                | 5                               |
|                                                                                    | 5                                       | 0                             | $-1/5$ | 300                | 5                               |

### Vertex $u_1$

Tab. 1: Values of  $\sigma_{i,k}$  and  $d(x, x_i)$

| Number of the sector, $i$ | $k$ |   |   |   |   |   |   |   |   |    | $d(x, x_i)$ |
|---------------------------|-----|---|---|---|---|---|---|---|---|----|-------------|
|                           | 1   | 2 | 3 | 4 | 5 | 6 | 7 | 8 | 9 | 10 |             |
| 0                         | 0   | 0 | 0 | 0 | 2 | 4 | 3 | 2 | 2 | 1  | 0           |
| 1                         | 0   | 2 | 3 | 2 | 2 | 2 | 0 | 0 | 2 | 1  | 0           |
| 2                         | 0   | 0 | 0 | 0 | 2 | 4 | 3 | 2 | 2 | 1  | 0           |
| 3                         | 0   | 2 | 3 | 2 | 2 | 2 | 0 | 0 | 2 | 1  | 0           |
| 4                         | 0   | 0 | 0 | 0 | 2 | 4 | 3 | 2 | 2 | 1  | 0           |
| 5                         | 0   | 2 | 3 | 2 | 2 | 2 | 0 | 0 | 2 | 1  | 0           |

Tab. 2: Values of  $\delta_{i,k}^{(1)}$  and  $\delta_{i,k}^{(2)}$ .

| Number of the sector, $i$ | $\delta_{i,k}^{(1)}$ |   |   |   |   | $\delta_{i,k}^{(2)}$ |   |   |   |   |
|---------------------------|----------------------|---|---|---|---|----------------------|---|---|---|---|
|                           | $k$                  |   |   |   |   | $k$                  |   |   |   |   |
|                           | 0                    | 1 | 2 | 3 | 4 | 0                    | 1 | 2 | 3 | 4 |
| 0                         | 1                    | 1 | 0 | 0 | 1 | 0                    | 0 | 0 | 0 | 0 |
| 1                         | 1                    | 1 | 0 | 0 | 1 | 0                    | 0 | 0 | 0 | 0 |
| 2                         | 1                    | 1 | 0 | 0 | 1 | 0                    | 0 | 0 | 0 | 0 |
| 3                         | 1                    | 1 | 0 | 0 | 1 | 0                    | 0 | 0 | 0 | 0 |
| 4                         | 1                    | 1 | 0 | 0 | 1 | 0                    | 0 | 0 | 0 | 0 |
| 5                         | 1                    | 1 | 0 | 0 | 1 | 0                    | 0 | 0 | 0 | 0 |

For  $n \geq 1$

$$e_n(u_1) = 6r_2(n-2;5,5) + 9r_2(n-3;5,5) + 6r_2(n-4;5,5) + 12r_2(n-5;5,5) + 18r_2(n-6;5,5) + 9r_2(n-7;5,5) + 6r_2(n-8;5,5) + 12r_2(n-9;5,5) + 6r_2(n-10;5,5) + 6r_1(n;5) + 6r_1(n-1;5) + 6r_1(n-4;5).$$

$$\text{For } n \geq 1 \quad e_n(u_1) = \begin{cases} \frac{18n}{5}, n \equiv 0(\text{mod } 5) \\ 3n, n \equiv 2,3(\text{mod } 5) \end{cases}, \quad e_n(u_1) = \begin{cases} \frac{18n+12}{5}, n \equiv 1(\text{mod } 5) \\ \frac{18n-12}{5}, n \equiv 4(\text{mod } 5) \end{cases}.$$

### Vertex $u_2$

Tab. 1: Values of  $\sigma_{i,k}$  and  $d(x, x_i)$

| Number of the sector, $i$ | $k$ |   |   |   |   |   |   |   |   |    | $d(x, x_i)$ |
|---------------------------|-----|---|---|---|---|---|---|---|---|----|-------------|
|                           | 1   | 2 | 3 | 4 | 5 | 6 | 7 | 8 | 9 | 10 |             |
| 0                         | 0   | 1 | 1 | 1 | 1 | 3 | 3 | 2 | 1 | 1  | 0           |
| 1                         | 0   | 2 | 3 | 2 | 2 | 2 | 0 | 0 | 2 | 1  | 1           |
| 2                         | 1   | 2 | 2 | 1 | 1 | 1 | 1 | 2 | 2 | 1  | 3           |
| 3                         | 1   | 2 | 2 | 1 | 1 | 1 | 1 | 2 | 2 | 1  | 0           |
| 4                         | 0   | 1 | 1 | 1 | 1 | 3 | 3 | 2 | 1 | 1  | 3           |
| 5                         | 0   | 1 | 1 | 1 | 1 | 3 | 3 | 2 | 1 | 1  | 2           |

Tab. 2: Values of  $\delta_{i,k}^{(1)}$  and  $\delta_{i,k}^{(2)}$ .

| Number of the sector, $i$ | $\delta_{i,k}^{(1)}$ |   |   |   |   |   |   |   | $\delta_{i,k}^{(2)}$ |   |   |   |   |   |   |   |
|---------------------------|----------------------|---|---|---|---|---|---|---|----------------------|---|---|---|---|---|---|---|
|                           | $k$                  |   |   |   |   |   |   |   | $k$                  |   |   |   |   |   |   |   |
|                           | 0                    | 1 | 2 | 3 | 4 | 5 | 6 | 7 | 0                    | 1 | 2 | 3 | 4 | 5 | 6 | 7 |
| 0                         | 1                    | 1 | 0 | 1 | 1 | 0 | 0 | 0 | 1                    | 0 | 0 | 0 | 0 | 0 | 0 | 0 |
| 1                         | 1                    | 1 | 0 | 0 | 1 | 0 | 0 | 0 | 0                    | 0 | 0 | 0 | 0 | 0 | 0 | 0 |
| 2                         | 1                    | 0 | 0 | 1 | 2 | 1 | 0 | 0 | 1                    | 1 | 0 | 0 | 1 | 1 | 1 | 0 |
| 3                         | 1                    | 0 | 0 | 0 | 1 | 0 | 0 | 1 | 1                    | 0 | 0 | 0 | 0 | 0 | 0 | 0 |
| 4                         | 1                    | 1 | 1 | 0 | 0 | 0 | 0 | 0 | 0                    | 0 | 0 | 0 | 0 | 0 | 0 | 0 |
| 5                         | 1                    | 1 | 1 | 2 | 3 | 1 | 0 | 0 | 1                    | 1 | 1 | 1 | 1 | 0 | 0 | 0 |

For  $n \geq 4$

$$e_n(u_2) = r_2(n-1;5,5) + 3r_2(n-2;5,5) + 5r_2(n-3;5,5) + 7r_2(n-4;5,5) + 8r_2(n-5;5,5) + 10r_2(n-6;5,5) + 9r_2(n-7;5,5) + 9r_2(n-8;5,5) + 10r_2(n-9;5,5) + 10r_2(n-10;5,5) + 6r_2(n-11;5,5) + 4r_2(n-12;5,5) + 2r_2(n-13;5,5) + 8r_1(n;5) + 9r_1(n-1;5) + 10r_1(n-2;5) + 7r_1(n-3;5) + 5r_1(n-4;5).$$

$$\text{For } n \geq 4 \quad e_n(u_2) = \begin{cases} \frac{18n-10}{5}, n \equiv 0(\text{mod } 5) \\ \frac{17n+3}{5}, n \equiv 1(\text{mod } 5) \\ \frac{16n+13}{5}, n \equiv 2(\text{mod } 5) \end{cases}, \quad e_n(u_2) = \begin{cases} \frac{16n+2}{5}, n \equiv 3(\text{mod } 5) \\ \frac{17n-8}{5}, n \equiv 4(\text{mod } 5) \end{cases}.$$

| krg                                                                                |  | Plane group                             | $a$                           | $b$    | $\gamma, ^\circ$   |                                 |
|------------------------------------------------------------------------------------|--|-----------------------------------------|-------------------------------|--------|--------------------|---------------------------------|
| 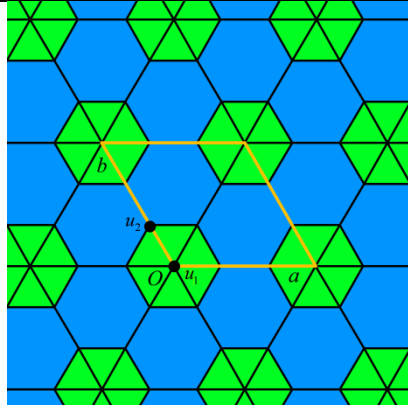  |  | $p6mm$                                  | 3.0000                        | 3.0000 | 120                |                                 |
|                                                                                    |  |                                         |                               |        |                    |                                 |
|                                                                                    |  | Vertex                                  | CN                            | $x$    | $y$                |                                 |
|                                                                                    |  | $u_1$                                   | 6                             | 0      | 0                  |                                 |
|                                                                                    |  | $u_2$                                   | 4                             | 0      | 0.3333             |                                 |
|                                                                                    |  |                                         |                               |        |                    |                                 |
| Growth polygon                                                                     |  | Number of the growth polygon vertex $i$ | Vertex fractional coordinates |        | $\alpha_i, ^\circ$ | Length of the ray $d(\Gamma_i)$ |
|                                                                                    |  |                                         | $x_i$                         | $y_i$  |                    |                                 |
|  |  | 0                                       | 1/3                           | 0      | 0                  | 3                               |
|                                                                                    |  | 1                                       | 1/3                           | 1/3    | 60                 | 3                               |
|                                                                                    |  | 2                                       | 0                             | 1/3    | 120                | 3                               |
|                                                                                    |  | 3                                       | -1/3                          | 0      | 180                | 3                               |
|                                                                                    |  | 4                                       | -1/3                          | -1/3   | 240                | 3                               |
|                                                                                    |  | 5                                       | 0                             | -1/3   | 300                | 3                               |

### Vertex $u_1$

Tab. 1: Values of  $\sigma_{i,k}$  and  $d(x, x_i)$

| Number of the sector, $i$ | $k$ |   |   |   |   |   | $d(x, x_i)$ |
|---------------------------|-----|---|---|---|---|---|-------------|
|                           | 1   | 2 | 3 | 4 | 5 | 6 |             |
| 0                         | 0   | 0 | 2 | 2 | 2 | 1 | 0           |
| 1                         | 0   | 0 | 2 | 2 | 2 | 1 | 0           |
| 2                         | 0   | 0 | 2 | 2 | 2 | 1 | 0           |
| 3                         | 0   | 0 | 2 | 2 | 2 | 1 | 0           |
| 4                         | 0   | 0 | 2 | 2 | 2 | 1 | 0           |
| 5                         | 0   | 0 | 2 | 2 | 2 | 1 | 0           |

Tab. 2: Values of  $\delta_{i,k}^{(1)}$  and  $\delta_{i,k}^{(2)}$ .

| Number of the sector, $i$ | $\delta_{i,k}^{(1)}$ |   |   | $\delta_{i,k}^{(2)}$ |   |   |
|---------------------------|----------------------|---|---|----------------------|---|---|
|                           | $k$                  |   |   | $k$                  |   |   |
|                           | 0                    | 1 | 2 | 0                    | 1 | 2 |
| 0                         | 1                    | 1 | 1 | 0                    | 0 | 0 |
| 1                         | 1                    | 1 | 1 | 0                    | 0 | 0 |
| 2                         | 1                    | 1 | 1 | 0                    | 0 | 0 |
| 3                         | 1                    | 1 | 1 | 0                    | 0 | 0 |
| 4                         | 1                    | 1 | 1 | 0                    | 0 | 0 |
| 5                         | 1                    | 1 | 1 | 0                    | 0 | 0 |

For  $n \geq 1$

$$e_n(u_1) = 12r_2(n-3;3,3) + 12r_2(n-4;3,3) + 12r_2(n-5;3,3) + 12r_2(n-6;3,3) + 6r_1(n;3) + 6r_1(n-1;3) + 6r_1(n-2;3).$$

$$\text{For } n \geq 1 \quad e_n(u_1) = \begin{cases} 6n, n \equiv 0(\text{mod } 3) \\ 4n+2, n \equiv 1(\text{mod } 3) \\ 4n-2, n \equiv 2(\text{mod } 3) \end{cases}.$$

### Vertex $u_2$

Tab. 1: Values of  $\sigma_{i,k}$  and  $d(x, x_i)$

| Number of the sector, $i$ | $k$ |   |   |   |   |   | $d(x, x_i)$ |
|---------------------------|-----|---|---|---|---|---|-------------|
|                           | 1   | 2 | 3 | 4 | 5 | 6 |             |
| 0                         | 0   | 0 | 2 | 2 | 2 | 1 | 3           |
| 1                         | 0   | 0 | 2 | 2 | 2 | 1 | 2           |
| 2                         | 0   | 0 | 2 | 2 | 2 | 1 | 2           |
| 3                         | 0   | 0 | 2 | 2 | 2 | 1 | 3           |
| 4                         | 0   | 0 | 2 | 2 | 2 | 1 | 1           |
| 5                         | 0   | 0 | 2 | 2 | 2 | 1 | 1           |

Tab. 2: Values of  $\delta_{i,k}^{(1)}$  and  $\delta_{i,k}^{(2)}$ .

| Number of the sector, $i$ | $\delta_{i,k}^{(1)}$ |   |   |   |   |   |   | $\delta_{i,k}^{(2)}$ |   |   |   |   |   |   |
|---------------------------|----------------------|---|---|---|---|---|---|----------------------|---|---|---|---|---|---|
|                           | $k$                  |   |   |   |   |   |   | $k$                  |   |   |   |   |   |   |
|                           | 0                    | 1 | 2 | 3 | 4 | 5 | 6 | 0                    | 1 | 2 | 3 | 4 | 5 | 6 |
| 0                         | 1                    | 1 | 1 | 1 | 1 | 0 | 0 | 1                    | 1 | 1 | 1 | 1 | 0 | 0 |
| 1                         | 1                    | 1 | 1 | 1 | 1 | 0 | 0 | 1                    | 2 | 1 | 1 | 0 | 0 | 0 |
| 2                         | 1                    | 1 | 1 | 0 | 0 | 0 | 0 | 0                    | 0 | 0 | 0 | 0 | 0 | 0 |
| 3                         | 1                    | 2 | 2 | 2 | 0 | 0 | 0 | 1                    | 1 | 1 | 0 | 0 | 0 | 0 |
| 4                         | 1                    | 1 | 1 | 1 | 1 | 1 | 1 | 1                    | 1 | 1 | 0 | 0 | 0 | 0 |
| 5                         | 1                    | 1 | 1 | 0 | 0 | 0 | 0 | 0                    | 0 | 0 | 0 | 0 | 0 | 0 |

For  $n \geq 5$

$$e_n(u_2) = 4r_2(n-4;3,3) + 8r_2(n-5;3,3) + 12r_2(n-6;3,3) + 10r_2(n-7;3,3) + 6r_2(n-8;3,3) + 2r_2(n-9;3,3) + 16r_1(n;3) + 16r_1(n-1;3) + 14r_1(n-2;3).$$

$$\text{For } n \geq 5 \quad e_n(u_2) = \begin{cases} \frac{14n}{3}, n \equiv 0(\text{mod } 3) \\ \frac{14n+4}{3}, n \equiv 1(\text{mod } 3) \\ \frac{14n-4}{3}, n \equiv 2(\text{mod } 3) \end{cases}.$$

| krh                                                                                | Plane group                             | $a$                           | $b$    | $\gamma, ^\circ$   |                                 |
|------------------------------------------------------------------------------------|-----------------------------------------|-------------------------------|--------|--------------------|---------------------------------|
| 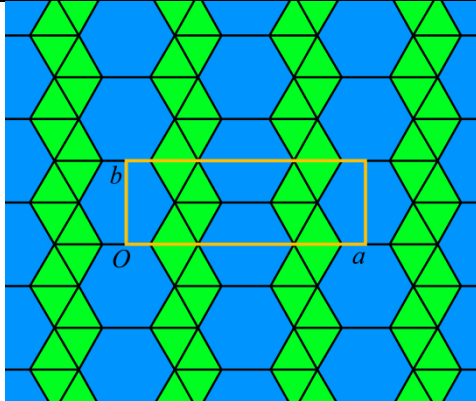  | $c2mm$                                  | 5.0000                        | 1.7321 | 90                 |                                 |
|                                                                                    |                                         |                               |        |                    |                                 |
|                                                                                    | Vertex                                  | CN                            | $x$    | $y$                |                                 |
|                                                                                    | $u_1$                                   | 5                             | 0.3    | 0                  |                                 |
|                                                                                    | $u_2$                                   | 4                             | 0.1    | 0                  |                                 |
|                                                                                    |                                         |                               |        |                    |                                 |
|                                                                                    |                                         |                               |        |                    |                                 |
| Growth polygon                                                                     | Number of the growth polygon vertex $i$ | Vertex fractional coordinates |        | $\alpha_i, ^\circ$ | Length of the ray $d(\Gamma_i)$ |
|  | 0                                       | 1/6                           | 1/6    | 19.107             | 6                               |
|                                                                                    | 1                                       | 1/8                           | 3/8    | 46.103             | 8                               |
|                                                                                    | 2                                       | 0                             | 1/2    | 90                 | 2                               |
|                                                                                    | 3                                       | -1/8                          | 3/8    | 133.897            | 8                               |
|                                                                                    | 4                                       | -1/6                          | 1/6    | 160.893            | 6                               |
|                                                                                    | 5                                       | -1/6                          | -1/6   | 199.107            | 6                               |
|                                                                                    | 6                                       | -1/8                          | -3/8   | 226.103            | 8                               |
|                                                                                    | 7                                       | 0                             | -1/2   | 270                | 2                               |
|                                                                                    | 8                                       | 1/8                           | -3/8   | 313.897            | 8                               |
|                                                                                    | 9                                       | 1/6                           | -1/6   | 340.893            | 6                               |

### Vertex $u_1$

Tab. 1: Values of  $\sigma_{i,k}$  and  $d(x, x_i)$

| Number of the sector, $i$ | $k$ |   |   |   |   |   |   |   |   |    |    |    |    |    | $d(x, x_i)$ |
|---------------------------|-----|---|---|---|---|---|---|---|---|----|----|----|----|----|-------------|
|                           | 1   | 2 | 3 | 4 | 5 | 6 | 7 | 8 | 9 | 10 | 11 | 12 | 13 | 14 |             |
| 0                         | 0   | 1 | 1 | 1 | 1 | 2 | 3 | 1 | 1 | 2  | 2  | 0  | 0  | 1  | 0           |
| 1                         | 1   | 0 | 0 | 1 | 2 | 1 | 0 | 1 | 1 | 1  | 0  | 0  | 0  | 0  | 0           |
| 2                         | 1   | 1 | 0 | 0 | 2 | 2 | 0 | 0 | 1 | 1  | 0  | 0  | 0  | 0  | 0           |
| 3                         | 0   | 0 | 1 | 1 | 1 | 1 | 3 | 2 | 1 | 2  | 2  | 1  | 0  | 1  | 0           |
| 4                         | 1   | 1 | 1 | 2 | 2 | 3 | 1 | 1 | 3 | 0  | 0  | 1  | 0  | 0  | 0           |
| 5                         | 0   | 0 | 1 | 1 | 1 | 1 | 3 | 2 | 1 | 2  | 2  | 1  | 0  | 1  | 0           |
| 6                         | 1   | 1 | 0 | 0 | 2 | 2 | 0 | 0 | 1 | 1  | 0  | 0  | 0  | 0  | 0           |
| 7                         | 1   | 0 | 0 | 1 | 2 | 1 | 0 | 1 | 1 | 1  | 0  | 0  | 0  | 0  | 0           |
| 8                         | 0   | 1 | 1 | 1 | 1 | 2 | 3 | 1 | 1 | 2  | 2  | 0  | 0  | 1  | 0           |
| 9                         | 0   | 0 | 1 | 1 | 1 | 3 | 2 | 2 | 3 | 1  | 1  | 1  | 0  | 0  | 0           |

Tab. 2: Values of  $\delta_{i,k}^{(1)}$  and  $\delta_{i,k}^{(2)}$ .

| Number of the sector, $i$ | $\delta_{i,k}^{(1)}$ |   |   |   |   | $\delta_{i,k}^{(2)}$ |   |   |   |   |
|---------------------------|----------------------|---|---|---|---|----------------------|---|---|---|---|
|                           | $k$                  |   |   |   |   | $k$                  |   |   |   |   |
|                           | 0                    | 1 | 2 | 3 | 4 | 0                    | 1 | 2 | 3 | 4 |
| 0                         | 1                    | 0 | 0 | 1 | 0 | 0                    | 0 | 0 | 0 | 0 |
| 1                         | 1                    | 0 | 0 | 0 | 1 | 0                    | 0 | 0 | 0 | 0 |

|   |   |   |   |   |   |   |   |   |   |   |
|---|---|---|---|---|---|---|---|---|---|---|
| 2 | 1 | 0 | 0 | 0 | 0 | 0 | 0 | 0 | 0 | 0 |
| 3 | 1 | 0 | 0 | 0 | 1 | 0 | 0 | 0 | 0 | 0 |
| 4 | 1 | 0 | 0 | 1 | 0 | 0 | 0 | 0 | 0 | 0 |
| 5 | 1 | 0 | 0 | 1 | 0 | 0 | 0 | 0 | 0 | 0 |
| 6 | 1 | 0 | 0 | 0 | 1 | 0 | 0 | 0 | 0 | 0 |
| 7 | 1 | 0 | 0 | 0 | 0 | 0 | 0 | 0 | 0 | 0 |
| 8 | 1 | 0 | 0 | 0 | 1 | 0 | 0 | 0 | 0 | 0 |
| 9 | 1 | 0 | 0 | 1 | 0 | 0 | 0 | 0 | 0 | 0 |

For  $n \geq 1$

$$e_n(u_1) = 4r_2(n-1; 2, 8) + 2r_2(n-2; 2, 8) + 2r_2(n-4; 2, 8) + 8r_2(n-5; 2, 8) + 6r_2(n-6; 2, 8) + 2r_2(n-8; 2, 8) + \\ + 4r_2(n-9; 2, 8) + 4r_2(n-10; 2, 8) + r_2(n-1; 6, 6) + r_2(n-2; 6, 6) + 2r_2(n-3; 6, 6) + 3r_2(n-4; 6, 6) + \\ + 3r_2(n-5; 6, 6) + 6r_2(n-6; 6, 6) + 3r_2(n-7; 6, 6) + 3r_2(n-8; 6, 6) + 6r_2(n-9; 6, 6) + r_2(n-10; 6, 6) + \\ + r_2(n-11; 6, 6) + 2r_2(n-12; 6, 6) + 2r_2(n-2; 6, 8) + 4r_2(n-3; 6, 8) + 4r_2(n-4; 6, 8) + 4r_2(n-5; 6, 8) + \\ + 6r_2(n-6; 6, 8) + 12r_2(n-7; 6, 8) + 6r_2(n-8; 6, 8) + 4r_2(n-9; 6, 8) + 8r_2(n-10; 6, 8) + 8r_2(n-11; 6, 8) + \\ + 2r_2(n-12; 6, 8) + 4r_2(n-14; 6, 8) + 2r_1(n; 2) + 4r_1(n; 6) + 4r_1(n-3; 6) + 4r_1(n; 8) + 4r_1(n-4; 8).$$

$$\text{For } n \geq 1 \quad e_n(u_1) = \begin{cases} 4n+1, n \equiv 1, 4, 7, 10, 13, 16, 19, 22 \pmod{24} \\ \frac{14n}{3}, n \equiv 0, 3, 6, 9, 12, 15, 18, 21 \pmod{24} \\ 4n-1, n \equiv 2, 5, 8, 11, 14, 17, 20, 23 \pmod{24} \end{cases}.$$

## Vertex $u_2$

Tab. 1: Values of  $\sigma_{i,k}$  and  $d(x, x_i)$

| Number of the sector, $i$ | $k$ |   |   |   |   |   |   |   |   |    |    |    |    |    | $d(x, x_i)$ |
|---------------------------|-----|---|---|---|---|---|---|---|---|----|----|----|----|----|-------------|
|                           | 1   | 2 | 3 | 4 | 5 | 6 | 7 | 8 | 9 | 10 | 11 | 12 | 13 | 14 |             |
| 0                         | 0   | 1 | 0 | 1 | 2 | 1 | 2 | 2 | 2 | 1  | 2  | 1  | 0  | 1  | 0           |
| 1                         | 1   | 1 | 1 | 0 | 1 | 2 | 1 | 0 | 0 | 1  | 0  | 0  | 0  | 0  | 0           |
| 2                         | 0   | 0 | 1 | 1 | 1 | 1 | 1 | 1 | 1 | 1  | 0  | 0  | 0  | 0  | 0           |
| 3                         | 0   | 1 | 1 | 0 | 2 | 2 | 2 | 1 | 2 | 2  | 1  | 1  | 0  | 1  | 0           |
| 4                         | 1   | 1 | 0 | 2 | 3 | 1 | 1 | 3 | 2 | 0  | 1  | 1  | 0  | 0  | 0           |
| 5                         | 0   | 1 | 1 | 0 | 2 | 2 | 2 | 1 | 2 | 2  | 1  | 1  | 0  | 1  | 0           |
| 6                         | 0   | 0 | 1 | 1 | 1 | 1 | 1 | 1 | 1 | 1  | 0  | 0  | 0  | 0  | 0           |
| 7                         | 1   | 1 | 1 | 0 | 1 | 2 | 1 | 0 | 0 | 1  | 0  | 0  | 0  | 0  | 0           |
| 8                         | 0   | 1 | 0 | 1 | 2 | 1 | 2 | 2 | 2 | 1  | 2  | 1  | 0  | 1  | 0           |
| 9                         | 1   | 0 | 0 | 3 | 1 | 1 | 3 | 2 | 2 | 1  | 1  | 1  | 0  | 0  | 0           |

Tab. 2: Values of  $\delta_{i,k}^{(1)}$  and  $\delta_{i,k}^{(2)}$ .

| Number of the sector, $i$ | $\delta_{i,k}^{(1)}$ |   |   |   |   | $\delta_{i,k}^{(2)}$ |   |   |   |   |
|---------------------------|----------------------|---|---|---|---|----------------------|---|---|---|---|
|                           | $k$                  |   |   |   |   | $k$                  |   |   |   |   |
|                           | 0                    | 1 | 2 | 3 | 4 | 0                    | 1 | 2 | 3 | 4 |
| 0                         | 1                    | 0 | 0 | 1 | 0 | 0                    | 0 | 0 | 0 | 0 |
| 1                         | 1                    | 0 | 0 | 0 | 1 | 0                    | 0 | 0 | 0 | 0 |
| 2                         | 1                    | 0 | 0 | 0 | 0 | 0                    | 0 | 0 | 0 | 0 |
| 3                         | 1                    | 0 | 0 | 0 | 1 | 0                    | 0 | 0 | 0 | 0 |
| 4                         | 1                    | 0 | 0 | 1 | 0 | 0                    | 0 | 0 | 0 | 0 |
| 5                         | 1                    | 0 | 0 | 1 | 0 | 0                    | 0 | 0 | 0 | 0 |
| 6                         | 1                    | 0 | 0 | 0 | 1 | 0                    | 0 | 0 | 0 | 0 |

|   |   |   |   |   |   |   |   |   |   |   |
|---|---|---|---|---|---|---|---|---|---|---|
| 7 | 1 | 0 | 0 | 0 | 0 | 0 | 0 | 0 | 0 | 0 |
| 8 | 1 | 0 | 0 | 0 | 1 | 0 | 0 | 0 | 0 | 0 |
| 9 | 1 | 0 | 0 | 1 | 0 | 0 | 0 | 0 | 0 | 0 |

For  $n \geq 1$

$$\begin{aligned}
e_n(u_2) = & 2r_2(n-1; 2, 8) + 2r_2(n-2; 2, 8) + 4r_2(n-3; 2, 8) + 2r_2(n-4; 2, 8) + 4r_2(n-5; 2, 8) + 6r_2(n-6; 2, 8) + \\
& + 4r_2(n-7; 2, 8) + 2r_2(n-8; 2, 8) + 2r_2(n-9; 2, 8) + 4r_2(n-10; 2, 8) + 2r_2(n-1; 6, 6) + r_2(n-2; 6, 6) + \\
& + 5r_2(n-4; 6, 6) + 4r_2(n-5; 6, 6) + 2r_2(n-6; 6, 6) + 4r_2(n-7; 6, 6) + 5r_2(n-8; 6, 6) + 4r_2(n-9; 6, 6) + \\
& + r_2(n-10; 6, 6) + 2r_2(n-11; 6, 6) + 2r_2(n-12; 6, 6) + 4r_2(n-2; 6, 8) + 2r_2(n-3; 6, 8) + 2r_2(n-4; 6, 8) + \\
& + 8r_2(n-5; 6, 8) + 6r_2(n-6; 6, 8) + 8r_2(n-7; 6, 8) + 6r_2(n-8; 6, 8) + 8r_2(n-9; 6, 8) + 6r_2(n-10; 6, 8) + \\
& + 6r_2(n-11; 6, 8) + 4r_2(n-12; 6, 8) + 4r_2(n-14; 6, 8) + 2r_1(n; 2) + 4r_1(n; 6) + 4r_1(n-3; 6) + \\
& + 4r_1(n; 8) + 4r_1(n-4; 8).
\end{aligned}$$

$$\text{For } n \geq 1 \quad e_n(u_2) = \begin{cases} \frac{13n-1}{3}, n \equiv 1, 4, 7, 10, 13, 16, 19, 22 \pmod{24} \\ 4n, n \equiv 0, 3, 6, 9, 12, 15, 18, 21 \pmod{24} \\ \frac{13n+1}{3}, n \equiv 2, 5, 8, 11, 14, 17, 20, 23 \pmod{24} \end{cases}.$$



| krj                                                                                | Plane group                             | $a$                           | $b$    | $\gamma, ^\circ$   |                                 |
|------------------------------------------------------------------------------------|-----------------------------------------|-------------------------------|--------|--------------------|---------------------------------|
| 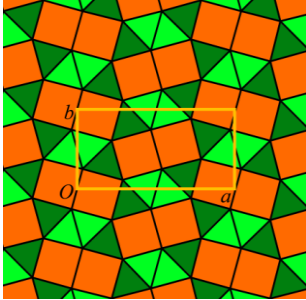  | $p2gg$                                  | 3.8636                        | 1.9319 | 90                 |                                 |
|                                                                                    |                                         |                               |        |                    |                                 |
|                                                                                    | Vertex                                  | CN                            | $x$    | $y$                |                                 |
|                                                                                    | $u_1$                                   | 5                             | 0.0335 | 0.2500             |                                 |
|                                                                                    | $u_2$                                   | 5                             | 0.2835 | 0.1160             |                                 |
|                                                                                    |                                         |                               |        |                    |                                 |
| Growth polygon                                                                     | Number of the growth polygon vertex $i$ | Vertex fractional coordinates |        | $\alpha_i, ^\circ$ | Length of the ray $d(\Gamma_i)$ |
|  | 0                                       | 1/4                           | 0      | 0                  | 4                               |
|                                                                                    | 1                                       | 1/6                           | 1/3    | 45                 | 6                               |
|                                                                                    | 2                                       | 0                             | 1/2    | 90                 | 2                               |
|                                                                                    | 3                                       | -1/6                          | 1/3    | 135                | 6                               |
|                                                                                    | 4                                       | -1/4                          | 0      | 180                | 4                               |
|                                                                                    | 5                                       | -1/6                          | -1/3   | 225                | 6                               |
|                                                                                    | 6                                       | 0                             | -1/2   | 270                | 2                               |
|                                                                                    | 7                                       | 1/6                           | -1/3   | 315                | 6                               |

Vertex  $u_1$

Tab. 1: Values of  $\sigma_{i,k}$  and  $d(x, x_i)$

| Number of the sector, $i$ | $k$ |   |   |   |   |   |   |   |   |    | $d(x, x_i)$ |
|---------------------------|-----|---|---|---|---|---|---|---|---|----|-------------|
|                           | 1   | 2 | 3 | 4 | 5 | 6 | 7 | 8 | 9 | 10 |             |
| 0                         | 0   | 1 | 2 | 2 | 3 | 2 | 3 | 2 | 0 | 1  | 0           |
| 1                         | 0   | 1 | 1 | 1 | 2 | 1 | 1 | 1 | 0 | 0  | 0           |
| 2                         | 1   | 0 | 1 | 2 | 2 | 1 | 0 | 1 | 0 | 0  | 0           |
| 3                         | 1   | 0 | 1 | 2 | 3 | 3 | 2 | 2 | 1 | 1  | 0           |
| 4                         | 0   | 1 | 2 | 2 | 2 | 2 | 3 | 2 | 1 | 1  | 0           |
| 5                         | 1   | 1 | 1 | 1 | 1 | 1 | 1 | 1 | 0 | 0  | 0           |
| 6                         | 0   | 1 | 1 | 1 | 2 | 1 | 1 | 1 | 0 | 0  | 0           |
| 7                         | 1   | 1 | 1 | 2 | 3 | 2 | 2 | 2 | 1 | 1  | 0           |

Tab. 2: Values of  $\delta_{i,k}^{(1)}$  and  $\delta_{i,k}^{(2)}$ .

| Number of the sector, $i$ | $\delta_{i,k}^{(1)}$ |   |   |   |   |   | $\delta_{i,k}^{(2)}$ |   |   |   |   |   |
|---------------------------|----------------------|---|---|---|---|---|----------------------|---|---|---|---|---|
|                           | $k$                  |   |   |   |   |   | $k$                  |   |   |   |   |   |
|                           | 0                    | 1 | 2 | 3 | 4 | 5 | 0                    | 1 | 2 | 3 | 4 | 5 |
| 0                         | 1                    | 0 | 1 | 0 | 0 | 0 | 0                    | 0 | 0 | 0 | 0 | 0 |
| 1                         | 1                    | 1 | 0 | 1 | 0 | 0 | 0                    | 0 | 0 | 0 | 0 | 0 |
| 2                         | 1                    | 0 | 0 | 0 | 0 | 0 | 0                    | 0 | 0 | 0 | 0 | 0 |
| 3                         | 1                    | 0 | 1 | 1 | 0 | 0 | 0                    | 0 | 0 | 0 | 0 | 0 |
| 4                         | 1                    | 0 | 1 | 0 | 0 | 0 | 0                    | 0 | 0 | 0 | 0 | 0 |
| 5                         | 1                    | 0 | 0 | 1 | 0 | 1 | 0                    | 0 | 0 | 0 | 0 | 0 |
| 6                         | 1                    | 0 | 0 | 0 | 0 | 0 | 0                    | 0 | 0 | 0 | 0 | 0 |
| 7                         | 1                    | 0 | 0 | 1 | 1 | 0 | 0                    | 0 | 0 | 0 | 0 | 0 |

For  $n \geq 1$

$$e_n(u_1) = 2r_2(n-1; 2, 6) + 3r_2(n-2; 2, 6) + 4r_2(n-3; 2, 6) + 5r_2(n-4; 2, 6) + 7r_2(n-5; 2, 6) + 4r_2(n-6; 2, 6) + \\ 3r_2(n-7; 2, 6) + 4r_2(n-8; 2, 6) + 2r_2(n-1; 4, 6) + 3r_2(n-2; 4, 6) + 6r_2(n-3; 4, 6) + 8r_2(n-4; 4, 6) + \\ + 11r_2(n-5; 4, 6) + 9r_2(n-6; 4, 6) + 10r_2(n-7; 4, 6) + 8r_2(n-8; 4, 6) + 3r_2(n-9; 4, 6) + 4r_2(n-10; 4, 6) + \\ 2r_1(n; 2) + 2r_1(n; 4) + 2r_1(n-2; 4) + 4r_1(n; 6) + r_1(n-1; 6) + r_1(n-2; 6) + 4r_1(n-3; 6) + r_1(n-4; 6) + r_1(n-5; 6).$$

$$\text{For } n \geq 1 \quad e_n(u_1) = \begin{cases} \frac{16n}{3}, n \equiv 0, 3, 6, 9(\text{mod } 12) \\ \frac{16n-1}{3}, n \equiv 1, 4, 7, 10(\text{mod } 12) . \\ \frac{16n+1}{3}, n \equiv 2, 5, 8, 11(\text{mod } 12) \end{cases}$$

### Vertex $u_2$

Tab. 1: Values of  $\sigma_{i,k}$  and  $d(x, x_i)$

| Number of the sector, $i$ | $k$ |   |   |   |   |   |   |   |   |    | $d(x, x_i)$ |
|---------------------------|-----|---|---|---|---|---|---|---|---|----|-------------|
|                           | 1   | 2 | 3 | 4 | 5 | 6 | 7 | 8 | 9 | 10 |             |
| 0                         | 1   | 1 | 2 | 2 | 3 | 3 | 2 | 1 | 0 | 1  | 0           |
| 1                         | 0   | 1 | 1 | 1 | 2 | 1 | 1 | 1 | 0 | 0  | 0           |
| 2                         | 1   | 0 | 1 | 2 | 1 | 1 | 1 | 1 | 0 | 0  | 0           |
| 3                         | 1   | 1 | 2 | 2 | 2 | 3 | 2 | 1 | 1 | 1  | 0           |
| 4                         | 0   | 1 | 2 | 2 | 3 | 2 | 2 | 2 | 1 | 1  | 0           |
| 5                         | 1   | 1 | 1 | 1 | 2 | 1 | 0 | 1 | 0 | 0  | 0           |
| 6                         | 0   | 1 | 2 | 1 | 1 | 1 | 1 | 1 | 0 | 0  | 0           |
| 7                         | 0   | 1 | 2 | 2 | 3 | 2 | 2 | 2 | 1 | 1  | 0           |

Tab. 2: Values of  $\delta_{i,k}^{(1)}$  and  $\delta_{i,k}^{(2)}$ .

| Number of the sector, $i$ | $\delta_{i,k}^{(1)}$ |   |   |   |   |   | $\delta_{i,k}^{(2)}$ |   |   |   |   |   |
|---------------------------|----------------------|---|---|---|---|---|----------------------|---|---|---|---|---|
|                           | $k$                  |   |   |   |   |   | $k$                  |   |   |   |   |   |
|                           | 0                    | 1 | 2 | 3 | 4 | 5 | 0                    | 1 | 2 | 3 | 4 | 5 |
| 0                         | 1                    | 0 | 0 | 0 | 0 | 0 | 0                    | 0 | 0 | 0 | 0 | 0 |
| 1                         | 1                    | 0 | 0 | 1 | 0 | 0 | 0                    | 0 | 0 | 0 | 0 | 0 |
| 2                         | 1                    | 0 | 0 | 0 | 0 | 0 | 0                    | 0 | 0 | 0 | 0 | 0 |
| 3                         | 1                    | 0 | 1 | 0 | 0 | 1 | 0                    | 0 | 0 | 0 | 0 | 0 |
| 4                         | 1                    | 0 | 0 | 0 | 0 | 0 | 0                    | 0 | 0 | 0 | 0 | 0 |
| 5                         | 1                    | 0 | 0 | 0 | 1 | 0 | 0                    | 0 | 0 | 0 | 0 | 0 |
| 6                         | 1                    | 0 | 0 | 0 | 0 | 0 | 0                    | 0 | 0 | 0 | 0 | 0 |
| 7                         | 1                    | 1 | 0 | 0 | 1 | 0 | 0                    | 0 | 0 | 0 | 0 | 0 |

For  $n \geq 1$

$$e_n(u_2) = 2r_2(n-1; 2, 6) + 3r_2(n-2; 2, 6) + 5r_2(n-3; 2, 6) + 5r_2(n-4; 2, 6) + 6r_2(n-5; 2, 6) + 4r_2(n-6; 2, 6) + \\ 3r_2(n-7; 2, 6) + 4r_2(n-8; 2, 6) + 2r_2(n-1; 4, 6) + 4r_2(n-2; 4, 6) + 8r_2(n-3; 4, 6) + 8r_2(n-4; 4, 6) + \\ + 11r_2(n-5; 4, 6) + 10r_2(n-6; 4, 6) + 8r_2(n-7; 4, 6) + 6r_2(n-8; 4, 6) + 3r_2(n-9; 4, 6) + 4r_2(n-10; 4, 6) + \\ 2r_1(n; 2) + 2r_1(n; 4) + 4r_1(n; 6) + r_1(n-1; 6) + r_1(n-2; 6) + r_1(n-3; 6) + 2r_1(n-4; 6) + r_1(n-5; 6).$$

$$\text{For } n \geq 1 \quad e_n(u_2) = \begin{cases} \frac{16n}{3}, n \equiv 0, 3, 6, 9(\text{mod } 12) \\ \frac{16n-1}{3}, n \equiv 1, 7(\text{mod } 12) \\ \frac{16n-2}{3}, n \equiv 2, 8(\text{mod } 12) \end{cases}, \quad e_n(u_2) = \begin{cases} \frac{16n+2}{3}, n \equiv 4, 10(\text{mod } 12) \\ \frac{16n+1}{3}, n \equiv 5, 11(\text{mod } 12) \end{cases}.$$

| krk                                                                                | Plane group                             | $a$                           | $b$     | $\gamma, ^\circ$   |                                 |
|------------------------------------------------------------------------------------|-----------------------------------------|-------------------------------|---------|--------------------|---------------------------------|
| 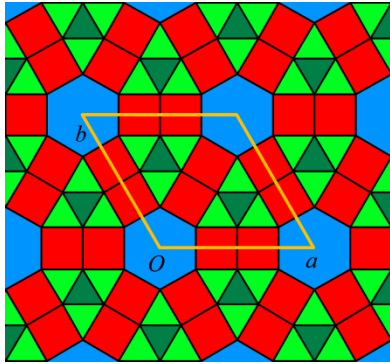  | $p6mm$                                  | 3.7321                        | 3.7321  | 120                |                                 |
|                                                                                    |                                         |                               |         |                    |                                 |
|                                                                                    | Vertex                                  | CN                            | $x$     | $y$                |                                 |
|                                                                                    | $u_1$                                   | 5                             | 0.15470 | 0.57735            |                                 |
|                                                                                    | $u_2$                                   | 4                             | 0.15470 | 0.30940            |                                 |
|                                                                                    |                                         |                               |         |                    |                                 |
| Growth polygon                                                                     | Number of the growth polygon vertex $i$ | Vertex fractional coordinates |         | $\alpha_i, ^\circ$ | Length of the ray $d(\Gamma_i)$ |
|  | 0                                       | 1/4                           | 0       | 0                  | 4                               |
|                                                                                    | 1                                       | 1/4                           | 1/4     | 60                 | 4                               |
|                                                                                    | 2                                       | 0                             | 1/4     | 120                | 4                               |
|                                                                                    | 3                                       | -1/4                          | 0       | 180                | 4                               |
|                                                                                    | 4                                       | -1/4                          | -1/4    | 240                | 4                               |
|                                                                                    | 5                                       | 0                             | -1/4    | 300                | 4                               |

### Vertex $u_1$

Tab. 1: Values of  $\sigma_{i,k}$  and  $d(x, x_i)$

| Number of the sector, $i$ | $k$ |   |   |   |   |   |   |   | $d(x, x_i)$ |
|---------------------------|-----|---|---|---|---|---|---|---|-------------|
|                           | 1   | 2 | 3 | 4 | 5 | 6 | 7 | 8 |             |
| 0                         | 0   | 1 | 2 | 2 | 3 | 2 | 1 | 1 | 0           |
| 1                         | 0   | 2 | 2 | 2 | 3 | 1 | 1 | 1 | 0           |
| 2                         | 0   | 1 | 1 | 2 | 3 | 2 | 2 | 1 | 0           |
| 3                         | 1   | 2 | 1 | 2 | 2 | 1 | 2 | 1 | 0           |
| 4                         | 0   | 1 | 1 | 2 | 3 | 2 | 2 | 1 | 0           |
| 5                         | 0   | 2 | 2 | 2 | 3 | 1 | 1 | 1 | 0           |

Tab. 2: Values of  $\delta_{i,k}^{(1)}$  and  $\delta_{i,k}^{(2)}$ .

| Number of the sector, $i$ | $\delta_{i,k}^{(1)}$ |   |   |   | $\delta_{i,k}^{(2)}$ |   |   |   |
|---------------------------|----------------------|---|---|---|----------------------|---|---|---|
|                           | $k$                  |   |   |   | $k$                  |   |   |   |
|                           | 0                    | 1 | 2 | 3 | 0                    | 1 | 2 | 3 |
| 0                         | 1                    | 1 | 0 | 0 | 0                    | 0 | 0 | 0 |
| 1                         | 1                    | 1 | 0 | 0 | 0                    | 0 | 0 | 0 |
| 2                         | 1                    | 1 | 0 | 1 | 0                    | 0 | 0 | 0 |
| 3                         | 1                    | 0 | 0 | 1 | 0                    | 0 | 0 | 0 |
| 4                         | 1                    | 0 | 0 | 1 | 0                    | 0 | 0 | 0 |
| 5                         | 1                    | 1 | 0 | 1 | 0                    | 0 | 0 | 0 |

For  $n \geq 1$

$$e_n(u_1) = r_2(n-1; 4, 4) + 9r_2(n-2; 4, 4) + 9r_2(n-3; 4, 4) + 12r_2(n-4; 4, 4) + 17r_2(n-5; 4, 4) + 9r_2(n-6; 4, 4) + 9r_2(n-7; 4, 4) + 6r_2(n-8; 4, 4) + 6r_1(n; 4) + 4r_1(n-1; 4) + 4r_1(n-3; 4).$$

$$\text{For } n \geq 1 \quad e_n(u_1) = \begin{cases} \frac{9n}{2}, n \equiv 0, 2(\text{mod } 4) \\ \frac{9n+1}{2}, n \equiv 1(\text{mod } 4) . \\ \frac{9n-1}{2}, n \equiv 3(\text{mod } 4) \end{cases}$$

### Vertex $u_2$

Tab. 1: Values of  $\sigma_{i,k}$  and  $d(x, x_i)$

| Number of the sector, $i$ | $k$ |   |   |   |   |   |   |   | $d(x, x_i)$ |
|---------------------------|-----|---|---|---|---|---|---|---|-------------|
|                           | 1   | 2 | 3 | 4 | 5 | 6 | 7 | 8 |             |
| 0                         | 0   | 1 | 2 | 2 | 3 | 2 | 1 | 1 | 0           |
| 1                         | 0   | 1 | 3 | 2 | 3 | 2 | 0 | 1 | 0           |
| 2                         | 0   | 1 | 2 | 2 | 3 | 2 | 1 | 1 | 0           |
| 3                         | 1   | 1 | 2 | 2 | 2 | 2 | 1 | 1 | 0           |
| 4                         | 0   | 0 | 1 | 2 | 3 | 3 | 2 | 1 | 0           |
| 5                         | 1   | 1 | 2 | 2 | 2 | 2 | 1 | 1 | 0           |

Tab. 2: Values of  $\delta_{i,k}^{(1)}$  and  $\delta_{i,k}^{(2)}$ .

| Number of the sector, $i$ | $\delta_{i,k}^{(1)}$ |   |   |   | $\delta_{i,k}^{(2)}$ |   |   |   |
|---------------------------|----------------------|---|---|---|----------------------|---|---|---|
|                           | $k$                  |   |   |   | $k$                  |   |   |   |
|                           | 0                    | 1 | 2 | 3 | 0                    | 1 | 2 | 3 |
| 0                         | 1                    | 0 | 0 | 0 | 0                    | 0 | 0 | 0 |
| 1                         | 1                    | 1 | 1 | 0 | 0                    | 0 | 0 | 0 |
| 2                         | 1                    | 1 | 1 | 0 | 0                    | 0 | 0 | 0 |
| 3                         | 1                    | 0 | 0 | 0 | 0                    | 0 | 0 | 0 |
| 4                         | 1                    | 0 | 1 | 1 | 0                    | 0 | 0 | 0 |
| 5                         | 1                    | 0 | 1 | 1 | 0                    | 0 | 0 | 0 |

For  $n \geq 1$

$$e_n(u_2) = 2r_2(n-1; 4, 4) + 5r_2(n-2; 4, 4) + 12r_2(n-3; 4, 4) + 12r_2(n-4; 4, 4) + 16r_2(n-5; 4, 4) + 13r_2(n-6; 4, 4) + 6r_2(n-7; 4, 4) + 6r_2(n-8; 4, 4) + 6r_1(n; 4) + 2r_1(n-1; 4) + 4r_1(n-2; 4) + 2r_1(n-3; 4).$$

$$\text{For } n \geq 1 \quad e_n(u_2) = \begin{cases} \frac{9n}{2}, n \equiv 0, 2(\text{mod } 4) \\ \frac{9n-1}{2}, n \equiv 1(\text{mod } 4) . \\ \frac{9n+1}{2}, n \equiv 3(\text{mod } 4) \end{cases}$$

| krl                                                                                | Plane group                             | $a$                           | $b$    | $\gamma, ^\circ$   |                                 |
|------------------------------------------------------------------------------------|-----------------------------------------|-------------------------------|--------|--------------------|---------------------------------|
| 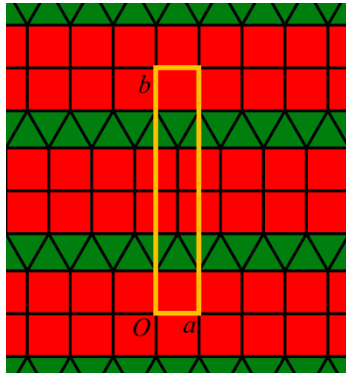  | $c2mm$                                  | 1.0000                        | 5.7321 | 90.0               |                                 |
|                                                                                    |                                         |                               |        |                    |                                 |
|                                                                                    | Vertex                                  | CN                            | $x$    | $y$                |                                 |
|                                                                                    | $u_1$                                   | 5                             | 1/2    | 0.3254             |                                 |
|                                                                                    | $u_2$                                   | 4                             | 1/2    | 1/2                |                                 |
|                                                                                    |                                         |                               |        |                    |                                 |
| Growth polygon                                                                     | Number of the growth polygon vertex $i$ | Vertex fractional coordinates |        | $\alpha_i, ^\circ$ | Length of the ray $d(\Gamma_i)$ |
|  | 0                                       | 1                             | 0      | 0                  | 1                               |
|                                                                                    | 1                                       | 1/6                           | 1/6    | 80.104             | 6                               |
|                                                                                    | 2                                       | -1/6                          | 1/6    | 99.896             | 6                               |
|                                                                                    | 3                                       | -1                            | 0      | 180                | 1                               |
|                                                                                    | 4                                       | -1/6                          | -1/6   | 260.104            | 6                               |
|                                                                                    | 5                                       | 1/6                           | -1/6   | 279.896            | 6                               |

### Vertex $u_1$

Tab. 1: Values of  $\sigma_{i,k}$  and  $d(x, x_i)$

| Number of the sector, $i$ | $k$ |   |   |   |   |   |   |   |   |    |    |    | $d(x, x_i)$ |
|---------------------------|-----|---|---|---|---|---|---|---|---|----|----|----|-------------|
|                           | 1   | 2 | 3 | 4 | 5 | 6 | 7 | 8 | 9 | 10 | 11 | 12 |             |
| 0                         | 0   | 1 | 1 | 1 | 1 | 1 | 1 | 0 | 0 | 0  | 0  | 0  | 0           |
| 1                         | 1   | 1 | 0 | 2 | 2 | 1 | 1 | 1 | 2 | 0  | 0  | 1  | 0           |
| 2                         | 0   | 1 | 1 | 1 | 1 | 1 | 1 | 0 | 0 | 0  | 0  | 0  | 0           |
| 3                         | 1   | 1 | 0 | 2 | 1 | 0 | 1 | 0 | 0 | 0  | 0  | 0  | 0           |
| 4                         | 0   | 0 | 0 | 1 | 1 | 1 | 2 | 2 | 2 | 1  | 1  | 1  | 0           |
| 5                         | 1   | 1 | 0 | 2 | 1 | 0 | 1 | 0 | 0 | 0  | 0  | 0  | 0           |

Tab. 2: Values of  $\delta_{i,k}^{(1)}$  and  $\delta_{i,k}^{(2)}$ .

| Number of the sector, $i$ | $\delta_{i,k}^{(1)}$ |   |   |   | $\delta_{i,k}^{(2)}$ |   |   |   |
|---------------------------|----------------------|---|---|---|----------------------|---|---|---|
|                           | $k$                  |   |   |   | $k$                  |   |   |   |
|                           | 0                    | 1 | 2 | 3 | 0                    | 1 | 2 | 3 |
| 0                         | 1                    | 0 | 0 | 0 | 0                    | 0 | 0 | 0 |
| 1                         | 1                    | 0 | 0 | 1 | 0                    | 0 | 0 | 0 |
| 2                         | 1                    | 0 | 0 | 1 | 0                    | 0 | 0 | 0 |
| 3                         | 1                    | 0 | 0 | 0 | 0                    | 0 | 0 | 0 |
| 4                         | 1                    | 0 | 0 | 1 | 0                    | 0 | 0 | 0 |
| 5                         | 1                    | 0 | 0 | 1 | 0                    | 0 | 0 | 0 |

For  $n \geq 1$

$$e_n(u_1) = 2r_2(n-1;1,6) + 4r_2(n-2;1,6) + 2r_2(n-3;1,6) + 6r_2(n-4;1,6) + 4r_2(n-5;1,6) + 2r_2(n-6;1,6) + \\ + 4r_2(n-7;1,6) + r_2(n-1;6,6) + r_2(n-2;6,6) + 3r_2(n-4;6,6) + 3r_2(n-5;6,6) + 2r_2(n-6;6,6) + \\ + 3r_2(n-7;6,6) + 3r_2(n-8;6,6) + 4r_2(n-9;6,6) + r_2(n-10;6,6) + r_2(n-11;6,6) + 2r_2(n-12;6,6) + \\ + 2r_1(n;1) + 4r_1(n;6) + 4r_1(n-3;6).$$

$$\text{For } n \geq 1 \quad e_n(u_1) = \begin{cases} \frac{14n}{3}, n \equiv 0,3(\text{mod } 6) \\ \frac{14n+1}{3}, n \equiv 1,4(\text{mod } 6) \\ \frac{14n-1}{3}, n \equiv 2,5(\text{mod } 6) \end{cases}.$$

### Vertex $u_2$

Tab. 1: Values of  $\sigma_{i,k}$  and  $d(x, x_i)$

| Number of the sector, $i$ | $k$ |   |   |   |   |   |   |   |   |    |    |    | $d(x, x_i)$ |
|---------------------------|-----|---|---|---|---|---|---|---|---|----|----|----|-------------|
|                           | 1   | 2 | 3 | 4 | 5 | 6 | 7 | 8 | 9 | 10 | 11 | 12 |             |
| 0                         | 0   | 2 | 0 | 1 | 2 | 0 | 1 | 0 | 0 | 0  | 0  | 0  | 0           |
| 1                         | 1   | 0 | 0 | 2 | 1 | 1 | 1 | 2 | 2 | 0  | 1  | 1  | 0           |
| 2                         | 0   | 2 | 0 | 1 | 2 | 0 | 1 | 0 | 0 | 0  | 0  | 0  | 0           |
| 3                         | 0   | 2 | 0 | 1 | 2 | 0 | 1 | 0 | 0 | 0  | 0  | 0  | 0           |
| 4                         | 1   | 0 | 0 | 2 | 1 | 1 | 1 | 2 | 2 | 0  | 1  | 1  | 0           |
| 5                         | 0   | 2 | 0 | 1 | 2 | 0 | 1 | 0 | 0 | 0  | 0  | 0  | 0           |

Tab. 2: Values of  $\delta_{i,k}^{(1)}$  and  $\delta_{i,k}^{(2)}$ .

| Number of the sector, $i$ | $\delta_{i,k}^{(1)}$ |   |   |   | $\delta_{i,k}^{(2)}$ |   |   |   |
|---------------------------|----------------------|---|---|---|----------------------|---|---|---|
|                           | $k$                  |   |   |   | $k$                  |   |   |   |
|                           | 0                    | 1 | 2 | 3 | 0                    | 1 | 2 | 3 |
| 0                         | 1                    | 0 | 0 | 0 | 0                    | 0 | 0 | 0 |
| 1                         | 1                    | 0 | 0 | 1 | 0                    | 0 | 0 | 0 |
| 2                         | 1                    | 0 | 0 | 1 | 0                    | 0 | 0 | 0 |
| 3                         | 1                    | 0 | 0 | 0 | 0                    | 0 | 0 | 0 |
| 4                         | 1                    | 0 | 0 | 1 | 0                    | 0 | 0 | 0 |
| 5                         | 1                    | 0 | 0 | 1 | 0                    | 0 | 0 | 0 |

For  $n \geq 1$

$$e_n(u_2) = 8r_2(n-2;1,6) + 4r_2(n-4;1,6) + 8r_2(n-5;1,6) + 4r_2(n-7;1,6) + 2r_2(n-1;6,6) + 4r_2(n-4;6,6) + \\ + 2r_2(n-5;6,6) + 2r_2(n-6;6,6) + 2r_2(n-7;6,6) + 4r_2(n-8;6,6) + 4r_2(n-9;6,6) + 2r_2(n-11;6,6) + \\ + 2r_2(n-12;6,6) + 2r_1(n;1) + 4r_1(n;6) + 4r_1(n-3;6).$$

$$\text{For } n \geq 1 \quad e_n(u_2) = \begin{cases} \frac{14n}{3}, n \equiv 0,3(\text{mod } 6) \\ \frac{14n-2}{3}, n \equiv 1,4(\text{mod } 6) \\ \frac{14n+2}{3}, n \equiv 2,5(\text{mod } 6) \end{cases}.$$

| krm                                                                                | Plane group                             | $a$                           | $b$    | $\gamma, ^\circ$   |                                 |
|------------------------------------------------------------------------------------|-----------------------------------------|-------------------------------|--------|--------------------|---------------------------------|
| 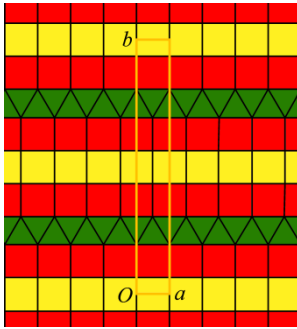  | $c2mm$                                  | 1.0000                        | 7.7321 | 90.0               |                                 |
|                                                                                    |                                         |                               |        |                    |                                 |
|                                                                                    | Vertex                                  | CN                            | $x$    | $y$                |                                 |
|                                                                                    | $u_1$                                   | 5                             | 0      | 0.6940             |                                 |
|                                                                                    | $u_2$                                   | 4                             | 0      | 0.4353             |                                 |
|                                                                                    |                                         |                               |        |                    |                                 |
|                                                                                    |                                         |                               |        |                    |                                 |
|                                                                                    |                                         |                               |        |                    |                                 |
| Growth polygon                                                                     | Number of the growth polygon vertex $i$ | Vertex fractional coordinates |        | $\alpha_i, ^\circ$ | Length of the ray $d(\Gamma_i)$ |
|                                                                                    |                                         | $x_i$                         | $y_i$  |                    |                                 |
|  | 0                                       | 1                             | 0      | 0                  | 1                               |
|                                                                                    | 1                                       | 1/8                           | 1/8    | 82.631             | 8                               |
|                                                                                    | 2                                       | -1/8                          | 1/8    | 97.369             | 8                               |
|                                                                                    | 3                                       | -1                            | 0      | 180                | 1                               |
|                                                                                    | 4                                       | -1/8                          | -1/8   | 262.631            | 8                               |
|                                                                                    | 5                                       | 1/8                           | -1/8   | 277.369            | 8                               |

### Vertex $u_1$

Tab. 1: Values of  $\sigma_{i,k}$  and  $d(x, x_i)$

| Number of the sector, $i$ | $k$ |   |   |   |   |   |   |   |   |    |    |    |    |    |    |    | $d(x, x_i)$ |
|---------------------------|-----|---|---|---|---|---|---|---|---|----|----|----|----|----|----|----|-------------|
|                           | 1   | 2 | 3 | 4 | 5 | 6 | 7 | 8 | 9 | 10 | 11 | 12 | 13 | 14 | 15 | 16 |             |
| 0                         | 1   | 1 | 1 | 0 | 2 | 1 | 1 | 0 | 1 | 0  | 0  | 0  | 0  | 0  | 0  | 0  | 0           |
| 1                         | 0   | 0 | 0 | 0 | 1 | 1 | 1 | 1 | 2 | 2  | 2  | 2  | 1  | 1  | 1  | 1  | 0           |
| 2                         | 1   | 1 | 1 | 0 | 2 | 1 | 1 | 0 | 1 | 0  | 0  | 0  | 0  | 0  | 0  | 0  | 0           |
| 3                         | 0   | 1 | 1 | 1 | 1 | 1 | 1 | 1 | 1 | 0  | 0  | 0  | 0  | 0  | 0  | 0  | 0           |
| 4                         | 1   | 1 | 1 | 0 | 2 | 2 | 2 | 1 | 1 | 1  | 1  | 2  | 0  | 0  | 0  | 1  | 0           |
| 5                         | 0   | 1 | 1 | 1 | 1 | 1 | 1 | 1 | 1 | 0  | 0  | 0  | 0  | 0  | 0  | 0  | 0           |

Tab. 2: Values of  $\delta_{i,k}^{(1)}$  and  $\delta_{i,k}^{(2)}$ .

| Number of the sector, $i$ | $\delta_{i,k}^{(1)}$ |   |   |   |   | $\delta_{i,k}^{(2)}$ |   |   |   |   |
|---------------------------|----------------------|---|---|---|---|----------------------|---|---|---|---|
|                           | $k$                  |   |   |   |   | $k$                  |   |   |   |   |
|                           | 0                    | 1 | 2 | 3 | 4 | 0                    | 1 | 2 | 3 | 4 |
| 0                         | 1                    | 0 | 0 | 0 | 0 | 0                    | 0 | 0 | 0 | 0 |
| 1                         | 1                    | 0 | 0 | 0 | 1 | 0                    | 0 | 0 | 0 | 0 |
| 2                         | 1                    | 0 | 0 | 0 | 1 | 0                    | 0 | 0 | 0 | 0 |
| 3                         | 1                    | 0 | 0 | 0 | 0 | 0                    | 0 | 0 | 0 | 0 |
| 4                         | 1                    | 0 | 0 | 0 | 1 | 0                    | 0 | 0 | 0 | 0 |
| 5                         | 1                    | 0 | 0 | 0 | 1 | 0                    | 0 | 0 | 0 | 0 |

For  $n \geq 1$

$$e_n(u_1) = 2r_2(n-1;1,8) + 4r_2(n-2;1,8) + 4r_2(n-3;1,8) + 2r_2(n-4;1,8) + 6r_2(n-5;1,8) + 4r_2(n-6;1,8) + \\ + 4r_2(n-7;1,8) + 2r_2(n-8;1,8) + 4r_2(n-9;1,8) + r_2(n-1;8,8) + r_2(n-2;8,8) + r_2(n-3;8,8) + \\ + 3r_2(n-5;8,8) + 3r_2(n-6;8,8) + 3r_2(n-7;8,8) + 2r_2(n-8;8,8) + 3r_2(n-9;8,8) + 3r_2(n-10;8,8) + \\ + 3r_2(n-11;8,8) + 4r_2(n-12;8,8) + r_2(n-13;8,8) + r_2(n-14;8,8) + r_2(n-15;8,8) + 2r_2(n-16;8,8) + \\ + 2r_1(n;1) + 4r_1(n;8) + 4r_1(n-4;8).$$

$$\text{For } n \geq 1 \quad e_n(u_1) = \begin{cases} \frac{9n}{2}, n \equiv 0, 2, 4, 6(\text{mod } 8) \\ \frac{9n+1}{2}, n \equiv 1, 5(\text{mod } 8) \\ \frac{9n-1}{2}, n \equiv 3, 7(\text{mod } 8) \end{cases}.$$

### Vertex $u_2$

Tab. 1: Values of  $\sigma_{i,k}$  and  $d(x, x_i)$

| Number of the sector, $i$ | $k$ |   |   |   |   |   |   |   |   |    |    |    |    |    |    |    | $d(x, x_i)$ |
|---------------------------|-----|---|---|---|---|---|---|---|---|----|----|----|----|----|----|----|-------------|
|                           | 1   | 2 | 3 | 4 | 5 | 6 | 7 | 8 | 9 | 10 | 11 | 12 | 13 | 14 | 15 | 16 |             |
| 0                         | 0   | 1 | 2 | 0 | 1 | 1 | 2 | 0 | 1 | 0  | 0  | 0  | 0  | 0  | 0  | 0  | 0           |
| 1                         | 1   | 1 | 0 | 0 | 2 | 2 | 1 | 1 | 1 | 1  | 2  | 2  | 0  | 0  | 1  | 1  | 0           |
| 2                         | 0   | 1 | 2 | 0 | 1 | 1 | 2 | 0 | 1 | 0  | 0  | 0  | 0  | 0  | 0  | 0  | 0           |
| 3                         | 0   | 2 | 1 | 0 | 1 | 2 | 1 | 0 | 1 | 0  | 0  | 0  | 0  | 0  | 0  | 0  | 0           |
| 4                         | 1   | 0 | 0 | 0 | 2 | 1 | 1 | 1 | 1 | 2  | 2  | 2  | 0  | 1  | 1  | 1  | 0           |
| 5                         | 0   | 2 | 1 | 0 | 1 | 2 | 1 | 0 | 1 | 0  | 0  | 0  | 0  | 0  | 0  | 0  | 0           |

Tab. 2: Values of  $\delta_{i,k}^{(1)}$  and  $\delta_{i,k}^{(2)}$ .

| Number of the sector, $i$ | $\delta_{i,k}^{(1)}$ |   |   |   |   | $\delta_{i,k}^{(2)}$ |   |   |   |   |
|---------------------------|----------------------|---|---|---|---|----------------------|---|---|---|---|
|                           | $k$                  |   |   |   |   | $k$                  |   |   |   |   |
|                           | 0                    | 1 | 2 | 3 | 4 | 0                    | 1 | 2 | 3 | 4 |
| 0                         | 1                    | 0 | 0 | 0 | 0 | 0                    | 0 | 0 | 0 | 0 |
| 1                         | 1                    | 0 | 0 | 0 | 1 | 0                    | 0 | 0 | 0 | 0 |
| 2                         | 1                    | 0 | 0 | 0 | 1 | 0                    | 0 | 0 | 0 | 0 |
| 3                         | 1                    | 0 | 0 | 0 | 0 | 0                    | 0 | 0 | 0 | 0 |
| 4                         | 1                    | 0 | 0 | 0 | 1 | 0                    | 0 | 0 | 0 | 0 |
| 5                         | 1                    | 0 | 0 | 0 | 1 | 0                    | 0 | 0 | 0 | 0 |

For  $n \geq 1$

$$e_n(u_2) = 6r_2(n-2;1,8) + 6r_2(n-3;1,8) + 4r_2(n-5;1,8) + 6r_2(n-6;1,8) + 6r_2(n-7;1,8) + 4r_2(n-9;1,8) + \\ + 2r_2(n-1;8,8) + r_2(n-2;8,8) + 4r_2(n-5;8,8) + 3r_2(n-6;8,8) + 2r_2(n-7;8,8) + 2r_2(n-8;8,8) + \\ + 2r_2(n-9;8,8) + 3r_2(n-10;8,8) + 4r_2(n-11;8,8) + 4r_2(n-12;8,8) + r_2(n-14;8,8) + 2r_2(n-15;8,8) + \\ + 2r_2(n-16;8,8) + 2r_1(n;1) + 4r_1(n;8) + 4r_1(n-4;8).$$

$$\text{For } n \geq 1 \quad e_n(u_2) = \begin{cases} \frac{9n}{2}, n \equiv 0, 2, 4, 6(\text{mod } 8) \\ \frac{9n+1}{2}, n \equiv 3, 7(\text{mod } 8) \\ \frac{9n-1}{2}, n \equiv 1, 5(\text{mod } 8) \end{cases}.$$



| k <sub>rn</sub>                                                                    | Plane group                                           | <i>a</i>                         | <i>b</i> | γ, °                      |                                                              |
|------------------------------------------------------------------------------------|-------------------------------------------------------|----------------------------------|----------|---------------------------|--------------------------------------------------------------|
| 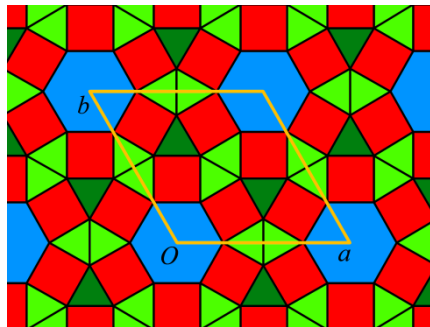  | <i>P6mm</i>                                           | 3.7321                           | 3.7321   | 120                       |                                                              |
|                                                                                    |                                                       |                                  |          |                           |                                                              |
|                                                                                    | Vertex                                                | CN                               | <i>x</i> | <i>y</i>                  |                                                              |
|                                                                                    | <i>u</i> <sub>1</sub>                                 | 5                                | 0        | 0.2680                    |                                                              |
|                                                                                    | <i>u</i> <sub>2</sub>                                 | 4                                | 0.1547   | 0.5774                    |                                                              |
|                                                                                    |                                                       |                                  |          |                           |                                                              |
| Growth polygon                                                                     | Number of<br>the growth<br>polygon<br>vertex <i>i</i> | Vertex fractional<br>coordinates |          | α <sub><i>i</i></sub> , ° | Length<br>of the<br>ray<br><i>d</i> (Γ <sub><i>i</i></sub> ) |
|  | 0                                                     | 1/4                              | 0        | 0                         | 4                                                            |
|                                                                                    | 1                                                     | 2/7                              | 1/7      | 30                        | 7                                                            |
|                                                                                    | 2                                                     | 1/4                              | 1/4      | 60                        | 4                                                            |
|                                                                                    | 3                                                     | 1/7                              | 2/7      | 90                        | 7                                                            |
|                                                                                    | 4                                                     | 0                                | 1/4      | 120                       | 4                                                            |
|                                                                                    | 5                                                     | −1/7                             | 1/7      | 150                       | 7                                                            |
|                                                                                    | 6                                                     | −1/4                             | 0        | 180                       | 4                                                            |
|                                                                                    | 7                                                     | −2/7                             | −1/7     | 210                       | 7                                                            |
|                                                                                    | 8                                                     | −1/4                             | −1/4     | 240                       | 4                                                            |
|                                                                                    | 9                                                     | −1/7                             | −2/7     | 270                       | 7                                                            |
|                                                                                    | 10                                                    | 0                                | −1/4     | 300                       | 4                                                            |
|                                                                                    | 11                                                    | 1/7                              | −1/7     | 330                       | 7                                                            |

### Vertex *u*<sub>1</sub>

Tab. 1: Values of  $\sigma_{i,k}$  and  $d(x, x_i)$

| Number of the sector, <i>i</i> | <i>k</i> |   |   |   |   |   |   |   |   |    |    | <i>d</i> ( <i>x</i> , <i>x</i> <sub><i>i</i></sub> ) |
|--------------------------------|----------|---|---|---|---|---|---|---|---|----|----|------------------------------------------------------|
|                                | 1        | 2 | 3 | 4 | 5 | 6 | 7 | 8 | 9 | 10 | 11 |                                                      |
| 0                              | 0        | 1 | 1 | 1 | 2 | 2 | 1 | 2 | 1 | 0  | 1  | 0                                                    |
| 1                              | 0        | 1 | 1 | 0 | 2 | 2 | 1 | 2 | 1 | 1  | 1  | 0                                                    |
| 2                              | 0        | 1 | 1 | 1 | 2 | 1 | 1 | 2 | 1 | 1  | 1  | 0                                                    |
| 3                              | 0        | 1 | 1 | 1 | 2 | 2 | 1 | 2 | 1 | 0  | 1  | 3                                                    |
| 4                              | 0        | 1 | 1 | 1 | 2 | 2 | 1 | 2 | 1 | 0  | 1  | 3                                                    |
| 5                              | 0        | 1 | 1 | 1 | 2 | 1 | 1 | 2 | 1 | 1  | 1  | 0                                                    |
| 6                              | 0        | 1 | 1 | 0 | 2 | 2 | 1 | 2 | 1 | 1  | 1  | 0                                                    |
| 7                              | 0        | 1 | 1 | 1 | 2 | 2 | 1 | 2 | 1 | 0  | 1  | 0                                                    |
| 8                              | 0        | 0 | 1 | 1 | 1 | 2 | 2 | 2 | 1 | 1  | 1  | 0                                                    |
| 9                              | 0        | 1 | 1 | 1 | 2 | 2 | 1 | 1 | 1 | 1  | 1  | 4                                                    |
| 10                             | 0        | 1 | 1 | 1 | 1 | 1 | 2 | 2 | 1 | 1  | 1  | 3                                                    |
| 11                             | 0        | 0 | 1 | 1 | 1 | 2 | 2 | 2 | 1 | 1  | 1  | 0                                                    |

Tab. 2: Values of  $\delta_{i,k}^{(1)}$  and  $\delta_{i,k}^{(2)}$ .

| Number | $\delta_{i,k}^{(1)}$ | $\delta_{i,k}^{(2)}$ |
|--------|----------------------|----------------------|
|--------|----------------------|----------------------|

| of the<br>sector, $i$ | $k$ |   |   |   |   |   |   | $k$ |   |   |   |   |   |   |
|-----------------------|-----|---|---|---|---|---|---|-----|---|---|---|---|---|---|
|                       | 0   | 1 | 2 | 3 | 4 | 5 | 6 | 0   | 1 | 2 | 3 | 4 | 5 | 6 |
| 0                     | 1   | 1 | 0 | 0 | 0 | 0 | 0 | 0   | 0 | 0 | 0 | 0 | 0 | 0 |
| 1                     | 1   | 0 | 0 | 0 | 0 | 0 | 0 | 0   | 0 | 0 | 0 | 0 | 0 | 0 |
| 2                     | 1   | 0 | 0 | 1 | 0 | 0 | 0 | 0   | 0 | 0 | 0 | 0 | 0 | 0 |
| 3                     | 1   | 0 | 0 | 0 | 0 | 0 | 0 | 1   | 1 | 0 | 0 | 1 | 1 | 0 |
| 4                     | 1   | 1 | 1 | 2 | 1 | 0 | 0 | 1   | 1 | 0 | 0 | 0 | 0 | 0 |
| 5                     | 1   | 1 | 0 | 0 | 1 | 1 | 0 | 1   | 0 | 0 | 0 | 0 | 0 | 0 |
| 6                     | 1   | 0 | 0 | 1 | 0 | 0 | 0 | 0   | 0 | 0 | 0 | 0 | 0 | 0 |
| 7                     | 1   | 0 | 0 | 0 | 0 | 0 | 0 | 0   | 0 | 0 | 0 | 0 | 0 | 0 |
| 8                     | 1   | 1 | 0 | 0 | 0 | 0 | 0 | 0   | 0 | 0 | 0 | 0 | 0 | 0 |
| 9                     | 1   | 1 | 1 | 0 | 0 | 0 | 0 | 1   | 0 | 1 | 1 | 0 | 0 | 0 |
| 10                    | 1   | 2 | 2 | 1 | 1 | 1 | 0 | 1   | 1 | 1 | 1 | 0 | 0 | 0 |
| 11                    | 1   | 0 | 1 | 1 | 0 | 0 | 1 | 0   | 0 | 0 | 0 | 0 | 0 | 0 |

For  $n \geq 5$

$$e_n(u_1) = 6r_2(n-2; 4, 7) + 8r_2(n-3; 4, 7) + 6r_2(n-4; 4, 7) + 17r_2(n-5; 4, 7) + 18r_2(n-6; 4, 7) + 14r_2(n-7; 4, 7) + 22r_2(n-8; 4, 7) + 15r_2(n-9; 4, 7) + 12r_2(n-10; 4, 7) + 15r_2(n-11; 4, 7) + 4r_2(n-12; 4, 7) + 2r_2(n-13; 4, 7) + 4r_2(n-14; 4, 7) + r_2(n-15; 4, 7) + 10r_1(n; 4) + 6r_1(n-1; 4) + 4r_1(n-2; 4) + 8r_1(n-3; 4) + 6r_1(n; 7) + 2r_1(n-1; 7) + 2r_1(n-2; 7) + 4r_1(n-3; 7) + 5r_1(n-4; 7) + 3r_1(n-5; 7) + 4r_1(n-6; 7).$$

$$\text{For } n \geq 5 \quad e_n(u_1) = \begin{cases} \frac{36n}{7}, n \equiv 0, 7, 14, 21(\text{mod } 28) \\ \frac{36n-8}{7}, n \equiv 1, 8, 15, 22(\text{mod } 28) \\ \frac{36n-2}{7}, n \equiv 2, 9, 16, 23(\text{mod } 28) \\ \frac{36n+4}{7}, n \equiv 3, 10, 17, 24(\text{mod } 28) \end{cases}, \quad e_n(u_1) = \begin{cases} \frac{36n-4}{7}, n \equiv 4, 11, 18, 25(\text{mod } 28) \\ \frac{36n+2}{7}, n \equiv 5, 12, 19, 26(\text{mod } 28) \\ \frac{36n+8}{7}, n \equiv 6, 13, 20, 27(\text{mod } 28) \end{cases}.$$

### Vertex $u_2$

Tab. 1: Values of  $\sigma_{i,k}$  and  $d(x, x_i)$

| Number<br>of the sector, $i$ | $k$ |   |   |   |   |   |   |   |   |    |    | $d(x, x_i)$ |
|------------------------------|-----|---|---|---|---|---|---|---|---|----|----|-------------|
|                              | 1   | 2 | 3 | 4 | 5 | 6 | 7 | 8 | 9 | 10 | 11 |             |
| 0                            | 0   | 1 | 1 | 1 | 2 | 1 | 1 | 2 | 1 | 1  | 1  | 0           |
| 1                            | 0   | 1 | 1 | 1 | 2 | 1 | 1 | 2 | 1 | 1  | 1  | 0           |
| 2                            | 0   | 1 | 1 | 1 | 1 | 1 | 2 | 2 | 1 | 1  | 1  | 0           |
| 3                            | 0   | 1 | 1 | 1 | 2 | 2 | 1 | 2 | 1 | 0  | 1  | 2           |
| 4                            | 0   | 1 | 1 | 1 | 2 | 1 | 1 | 2 | 1 | 1  | 1  | 3           |
| 5                            | 0   | 1 | 0 | 1 | 2 | 1 | 2 | 2 | 1 | 1  | 1  | 0           |
| 6                            | 0   | 1 | 1 | 1 | 2 | 2 | 1 | 1 | 1 | 1  | 1  | 0           |
| 7                            | 0   | 1 | 1 | 1 | 2 | 2 | 1 | 1 | 1 | 1  | 1  | 0           |
| 8                            | 0   | 1 | 0 | 1 | 2 | 1 | 2 | 2 | 1 | 1  | 1  | 0           |
| 9                            | 0   | 1 | 1 | 1 | 2 | 2 | 1 | 1 | 1 | 1  | 1  | 5           |
| 10                           | 0   | 1 | 1 | 1 | 2 | 2 | 1 | 2 | 1 | 0  | 1  | 2           |
| 11                           | 0   | 1 | 1 | 1 | 1 | 1 | 2 | 2 | 1 | 1  | 1  | 0           |

Tab. 2: Values of  $\delta_{i,k}^{(1)}$  and  $\delta_{i,k}^{(2)}$ .

| Number<br>of the<br>sector, $i$ | $\delta_{i,k}^{(1)}$ |   |   |   |   |   |   | $\delta_{i,k}^{(2)}$ |   |   |   |   |   |   |
|---------------------------------|----------------------|---|---|---|---|---|---|----------------------|---|---|---|---|---|---|
|                                 | $k$                  |   |   |   |   |   |   | $k$                  |   |   |   |   |   |   |
|                                 | 0                    | 1 | 2 | 3 | 4 | 5 | 6 | 0                    | 1 | 2 | 3 | 4 | 5 | 6 |
| 0                               | 1                    | 1 | 0 | 0 | 0 | 0 | 0 | 0                    | 0 | 0 | 0 | 0 | 0 | 0 |
| 1                               | 1                    | 0 | 0 | 0 | 0 | 0 | 1 | 0                    | 0 | 0 | 0 | 0 | 0 | 0 |
| 2                               | 1                    | 1 | 0 | 0 | 0 | 0 | 0 | 0                    | 0 | 0 | 0 | 0 | 0 | 0 |
| 3                               | 1                    | 0 | 0 | 0 | 0 | 0 | 0 | 1                    | 0 | 0 | 1 | 1 | 0 | 1 |
| 4                               | 1                    | 1 | 2 | 2 | 0 | 0 | 0 | 1                    | 1 | 0 | 0 | 0 | 0 | 0 |
| 5                               | 1                    | 1 | 0 | 1 | 1 | 0 | 0 | 0                    | 0 | 0 | 0 | 0 | 0 | 0 |
| 6                               | 1                    | 0 | 0 | 1 | 0 | 0 | 0 | 0                    | 0 | 0 | 0 | 0 | 0 | 0 |
| 7                               | 1                    | 1 | 0 | 0 | 0 | 0 | 0 | 0                    | 0 | 0 | 0 | 0 | 0 | 0 |
| 8                               | 1                    | 0 | 0 | 1 | 0 | 0 | 0 | 0                    | 0 | 0 | 0 | 0 | 0 | 0 |
| 9                               | 1                    | 1 | 0 | 0 | 0 | 0 | 0 | 1                    | 1 | 0 | 1 | 1 | 0 | 0 |
| 10                              | 1                    | 1 | 1 | 2 | 1 | 0 | 0 | 1                    | 1 | 1 | 1 | 0 | 0 | 0 |
| 11                              | 1                    | 0 | 0 | 1 | 1 | 0 | 1 | 1                    | 0 | 0 | 0 | 0 | 0 | 0 |

For  $n \geq 6$

$$\begin{aligned}
 e_n(u_2) = & 8r_2(n-2;4,7) + 6r_2(n-3;4,7) + 10r_2(n-4;4,7) + 17r_2(n-5;4,7) + 13r_2(n-6;4,7) + 18r_2(n-7;4,7) + \\
 & + 21r_2(n-8;4,7) + 12r_2(n-9;4,7) + 15r_2(n-10;4,7) + 14r_2(n-11;4,7) + 2r_2(n-12;4,7) + 4r_2(n-13;4,7) + \\
 & + 2r_2(n-14;4,7) + r_2(n-15;4,7) + r_2(n-16;4,7) + 7r_1(n;4) + 7r_1(n-1;4) + 6r_1(n-2;4) + 6r_1(n-3;4) + \\
 & + 6r_1(n;7) + 3r_1(n-1;7) + 2r_1(n-2;7) + 4r_1(n-3;7) + 4r_1(n-4;7) + 3r_1(n-5;7) + 4r_1(n-6;7).
 \end{aligned}$$

For  $n \geq 6$

$$e_n(u_2) = \begin{cases} \frac{36n}{7}, n \equiv 7, 21(\text{mod } 28) \\ \frac{36n+13}{7}, n \equiv 1, 15(\text{mod } 28) \\ \frac{36n-2}{7}, n \equiv 9, 23(\text{mod } 28) \\ \frac{36n-10}{7}, n \equiv 3, 17(\text{mod } 28) \\ \frac{36n+10}{7}, n \equiv 11, 25(\text{mod } 28) \\ \frac{36n+2}{7}, n \equiv 5, 19(\text{mod } 28) \\ \frac{36n-13}{7}, n \equiv 13, 27(\text{mod } 28) \end{cases}, e_n(u_2) = \begin{cases} \frac{36n-14}{7}, n \equiv 0(\text{mod } 28) \\ \frac{36n-1}{7}, n \equiv 8(\text{mod } 28) \\ \frac{36n+12}{7}, n \equiv 2(\text{mod } 28) \\ \frac{36n-4}{7}, n \equiv 4(\text{mod } 28) \\ \frac{36n+1}{7}, n \equiv 6(\text{mod } 28) \\ \frac{36n+4}{7}, n \equiv 10(\text{mod } 28) \\ \frac{36n-12}{7}, n \equiv 12(\text{mod } 28) \end{cases}, e_n(u_2) = \begin{cases} \frac{36n+14}{7}, n \equiv 14(\text{mod } 28) \\ \frac{36n-16}{7}, n \equiv 16(\text{mod } 28) \\ \frac{36n+24}{7}, n \equiv 18(\text{mod } 28) \\ \frac{36n-27}{7}, n \equiv 20(\text{mod } 28) \\ \frac{36n+27}{7}, n \equiv 22(\text{mod } 28) \\ \frac{36n-24}{7}, n \equiv 24(\text{mod } 28) \\ \frac{36n+16}{7}, n \equiv 26(\text{mod } 28) \end{cases}$$

| krq                                                                                | Plane group                             | $a$                           | $b$    | $\gamma, ^\circ$   |                                 |
|------------------------------------------------------------------------------------|-----------------------------------------|-------------------------------|--------|--------------------|---------------------------------|
| 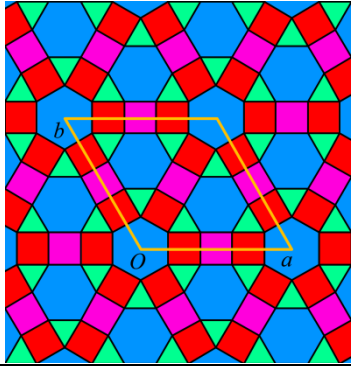  | $p6mm$                                  | 4.7321                        | 4.7321 | 120                |                                 |
|                                                                                    |                                         |                               |        |                    |                                 |
|                                                                                    | Vertex                                  | CN                            | $x$    | $y$                |                                 |
|                                                                                    | $u_1$                                   | 4                             | 0.1220 | 0.2440             |                                 |
|                                                                                    | $u_2$                                   | 4                             | 0.1220 | 0.4553             |                                 |
|                                                                                    |                                         |                               |        |                    |                                 |
| Growth polygon                                                                     | Number of the growth polygon vertex $i$ | Vertex fractional coordinates |        | $\alpha_i, ^\circ$ | Length of the ray $d(\Gamma_i)$ |
|  | 0                                       | 1/5                           | 0      | 0                  | 5                               |
|                                                                                    | 1                                       | 1/5                           | 1/5    | 60                 | 5                               |
|                                                                                    | 2                                       | 0                             | 1/5    | 120                | 5                               |
|                                                                                    | 3                                       | -1/5                          | 0      | 180                | 5                               |
|                                                                                    | 4                                       | -1/5                          | -1/5   | 240                | 5                               |
|                                                                                    | 5                                       | 0                             | -1/5   | 300                | 5                               |

### Vertex $u_1$

Tab. 1: Values of  $\sigma_{i,k}$  and  $d(x, x_i)$

| Number of the sector, $i$ | $k$ |   |   |   |   |   |   |   |   |    | $d(x, x_i)$ |
|---------------------------|-----|---|---|---|---|---|---|---|---|----|-------------|
|                           | 1   | 2 | 3 | 4 | 5 | 6 | 7 | 8 | 9 | 10 |             |
| 0                         | 0   | 1 | 1 | 3 | 3 | 3 | 3 | 2 | 1 | 1  | 0           |
| 1                         | 0   | 0 | 2 | 4 | 2 | 4 | 3 | 2 | 0 | 1  | 0           |
| 2                         | 0   | 1 | 1 | 3 | 3 | 3 | 3 | 2 | 1 | 1  | 0           |
| 3                         | 1   | 1 | 2 | 2 | 3 | 3 | 2 | 2 | 1 | 1  | 0           |
| 4                         | 0   | 0 | 1 | 2 | 2 | 4 | 4 | 2 | 2 | 1  | 0           |
| 5                         | 1   | 1 | 2 | 2 | 3 | 3 | 2 | 2 | 1 | 1  | 0           |
| 6                         | 0   | 1 | 1 | 3 | 3 | 3 | 3 | 2 | 1 | 1  | 0           |

Tab. 2: Values of  $\delta_{i,k}^{(1)}$  and  $\delta_{i,k}^{(2)}$ .

| Number of the sector, $i$ | $\delta_{i,k}^{(1)}$ |   |   |   |   | $\delta_{i,k}^{(2)}$ |   |   |   |   |
|---------------------------|----------------------|---|---|---|---|----------------------|---|---|---|---|
|                           | $k$                  |   |   |   |   | $k$                  |   |   |   |   |
|                           | 0                    | 1 | 2 | 3 | 4 | 0                    | 1 | 2 | 3 | 4 |
| 0                         | 1                    | 0 | 0 | 0 | 0 | 0                    | 0 | 0 | 0 | 0 |
| 1                         | 1                    | 1 | 1 | 1 | 0 | 0                    | 0 | 0 | 0 | 0 |
| 2                         | 1                    | 1 | 1 | 1 | 0 | 0                    | 0 | 0 | 0 | 0 |
| 3                         | 1                    | 0 | 0 | 0 | 0 | 0                    | 0 | 0 | 0 | 0 |
| 4                         | 1                    | 0 | 1 | 1 | 1 | 0                    | 0 | 0 | 0 | 0 |
| 5                         | 1                    | 0 | 1 | 1 | 1 | 0                    | 0 | 0 | 0 | 0 |

For  $n \geq 1$

$$e_n(u_1) = 2r_2(n-1;5,5) + 4r_2(n-2;5,5) + 9r_2(n-3;8,5) + 16r_2(n-4;5,5) + 16r_2(n-5;5,5) + 20r_2(n-6;5,5) + 17r_2(n-7;5,5) + 12r_2(n-8;5,5) + 6r_2(n-9;5,5) + 6r_2(n-10;5,5) + 6r_1(n;5) + 2r_1(n-1;5) + 4r_1(n-2;5) + 4r_1(n-3;5) + 2r_1(n-4;5).$$

$$\text{For } n \geq 1 \quad e_n(u_1) = \begin{cases} \frac{22n}{5}, n \equiv 0(\text{mod } 5) \\ \frac{22n-2}{5}, n \equiv 1(\text{mod } 5), \\ \frac{21n-2}{5}, n \equiv 2(\text{mod } 5) \end{cases}, \quad e_n(u_1) = \begin{cases} \frac{21n+2}{5}, n \equiv 3(\text{mod } 5) \\ \frac{22n+2}{5}, n \equiv 4(\text{mod } 5) \end{cases}.$$

### Vertex $u_2$

Tab. 1: Values of  $\sigma_{i,k}$  and  $d(x, x_i)$

| Number of the sector, $i$ | $k$ |   |   |   |   |   |   |   |   |    | $d(x, x_i)$ |
|---------------------------|-----|---|---|---|---|---|---|---|---|----|-------------|
|                           | 1   | 2 | 3 | 4 | 5 | 6 | 7 | 8 | 9 | 10 |             |
| 0                         | 0   | 0 | 1 | 2 | 2 | 4 | 4 | 2 | 2 | 1  | 3           |
| 1                         | 1   | 1 | 2 | 2 | 3 | 3 | 2 | 2 | 1 | 1  | 2           |
| 2                         | 0   | 0 | 1 | 2 | 2 | 4 | 4 | 2 | 2 | 1  | 2           |
| 3                         | 0   | 0 | 1 | 2 | 2 | 4 | 4 | 2 | 2 | 1  | 4           |
| 4                         | 0   | 0 | 1 | 2 | 2 | 4 | 4 | 2 | 2 | 1  | 1           |
| 5                         | 1   | 1 | 2 | 2 | 3 | 3 | 2 | 2 | 1 | 1  | 1           |
| 6                         | 0   | 0 | 1 | 2 | 2 | 4 | 4 | 2 | 2 | 1  | 3           |

Tab. 2: Values of  $\delta_{i,k}^{(1)}$  and  $\delta_{i,k}^{(2)}$ .

| Number<br>of the<br>sector, $i$ | $\delta_{i,k}^{(1)}$ |   |   |   |   |   |   |   |   |   |    |    | $\delta_{i,k}^{(2)}$ |   |   |   |   |   |   |   |   |   |    |    |
|---------------------------------|----------------------|---|---|---|---|---|---|---|---|---|----|----|----------------------|---|---|---|---|---|---|---|---|---|----|----|
|                                 | $k$                  |   |   |   |   |   |   |   |   |   |    |    | $k$                  |   |   |   |   |   |   |   |   |   |    |    |
|                                 | 0                    | 1 | 2 | 3 | 4 | 5 | 6 | 7 | 8 | 9 | 10 | 11 | 0                    | 1 | 2 | 3 | 4 | 5 | 6 | 7 | 8 | 9 | 10 | 11 |
| 0                               | 1                    | 1 | 1 | 1 | 1 | 1 | 1 | 1 | 1 | 0 | 0  | 0  | 1                    | 0 | 0 | 0 | 1 | 1 | 1 | 1 | 0 | 0 | 0  | 0  |
| 1                               | 1                    | 0 | 0 | 0 | 1 | 1 | 1 | 1 | 0 | 0 | 0  | 0  | 1                    | 1 | 2 | 2 | 1 | 1 | 1 | 0 | 0 | 0 | 0  | 0  |
| 2                               | 1                    | 0 | 1 | 1 | 1 | 0 | 0 | 0 | 0 | 0 | 0  | 0  | 0                    | 0 | 0 | 0 | 0 | 0 | 0 | 0 | 0 | 0 | 0  | 0  |
| 3                               | 1                    | 1 | 2 | 3 | 2 | 2 | 2 | 0 | 0 | 0 | 0  | 0  | 1                    | 1 | 1 | 1 | 1 | 0 | 0 | 0 | 0 | 0 | 0  | 0  |
| 4                               | 1                    | 1 | 1 | 1 | 1 | 1 | 1 | 1 | 2 | 1 | 1  | 1  | 1                    | 1 | 1 | 1 | 1 | 0 | 0 | 0 | 0 | 0 | 0  | 0  |
| 5                               | 1                    | 0 | 1 | 1 | 1 | 0 | 0 | 0 | 0 | 0 | 0  | 0  | 0                    | 0 | 0 | 0 | 0 | 0 | 0 | 0 | 0 | 0 | 0  | 0  |

For  $n \geq 8$

$$e_n(u_2) = r_2(n-2;5,5) + 2r_2(n-3;8,5) + 4r_2(n-4;5,5) + 7r_2(n-5;5,5) + 10r_2(n-6;5,5) + 15r_2(n-7;5,5) + 17r_2(n-8;5,5) + 16r_2(n-9;5,5) + 15r_2(n-10;5,5) + 11r_2(n-11;5,5) + 6r_2(n-12;5,5) + 3r_2(n-13;5,5) + r_2(n-14;5,5) + 14r_1(n;5) + 16r_1(n-1;5) + 14r_1(n-2;5) + 13r_1(n-3;5) + 15r_1(n-4;5).$$

$$\text{For } n \geq 8 \quad e_n(u_2) = \begin{cases} \frac{22n-5}{5}, n \equiv 0(\text{mod } 5) \\ \frac{21n+4}{5}, n \equiv 1(\text{mod } 5), \\ \frac{22n+1}{5}, n \equiv 2(\text{mod } 5) \end{cases}, \quad e_n(u_2) = \begin{cases} \frac{22n-6}{5}, n \equiv 3(\text{mod } 5) \\ \frac{21n+6}{5}, n \equiv 4(\text{mod } 5) \end{cases}.$$

| krr                                                                                | Plane group                             | $a$                           | $b$    | $\gamma, ^\circ$   |                                 |
|------------------------------------------------------------------------------------|-----------------------------------------|-------------------------------|--------|--------------------|---------------------------------|
| 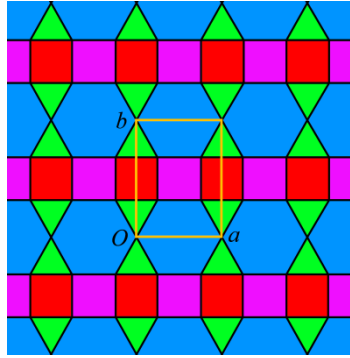  | $p2mm$                                  | 2.0000                        | 2.7321 | 90                 |                                 |
|                                                                                    |                                         |                               |        |                    |                                 |
|                                                                                    | Vertex                                  | CN                            | $x$    | $y$                |                                 |
|                                                                                    | $u_1$                                   | 4                             | 0      | 0.                 |                                 |
|                                                                                    | $u_2$                                   | 4                             | 0.25   | 0.3170             |                                 |
|                                                                                    |                                         |                               |        |                    |                                 |
| Growth polygon                                                                     | Number of the growth polygon vertex $i$ | Vertex fractional coordinates |        | $\alpha_i, ^\circ$ | Length of the ray $d(\Gamma_i)$ |
|  | 0                                       | 1/2                           | 0      | 0                  | 2                               |
|                                                                                    | 1                                       | 1/4                           | 1/4    | 53.795             | 4                               |
|                                                                                    | 2                                       | 0                             | 1/3    | 90                 | 3                               |
|                                                                                    | 3                                       | -1/4                          | 1/4    | 126.205            | 4                               |
|                                                                                    | 4                                       | -1/2                          | 0      | 180                | 2                               |
|                                                                                    | 5                                       | -1/4                          | -1/4   | 233.795            | 4                               |
|                                                                                    | 6                                       | 0                             | -1/3   | 270                | 3                               |
|                                                                                    | 7                                       | 1/4                           | -1/4   | 306.205            | 4                               |

### Vertex $u_1$

Tab. 1: Values of  $\sigma_{i,k}$  and  $d(x, x_i)$

| Number of the sector, $i$ | $k$ |   |   |   |   |   |   | $d(x, x_i)$ |
|---------------------------|-----|---|---|---|---|---|---|-------------|
|                           | 1   | 2 | 3 | 4 | 5 | 6 | 7 |             |
| 0                         | 0   | 1 | 1 | 1 | 1 | 1 | 0 | 2           |
| 1                         | 1   | 1 | 0 | 0 | 1 | 1 | 1 | 0           |
| 2                         | 1   | 1 | 0 | 0 | 1 | 1 | 1 | 0           |
| 3                         | 0   | 1 | 1 | 1 | 1 | 1 | 0 | 2           |
| 4                         | 0   | 1 | 1 | 1 | 1 | 1 | 0 | 2           |
| 5                         | 1   | 1 | 0 | 0 | 1 | 1 | 1 | 0           |
| 6                         | 1   | 1 | 0 | 0 | 1 | 1 | 1 | 0           |
| 7                         | 0   | 1 | 1 | 1 | 1 | 1 | 0 | 2           |

Tab. 2: Values of  $\delta_{i,k}^{(1)}$  and  $\delta_{i,k}^{(2)}$ .

| Number of the sector, $i$ | $\delta_{i,k}^{(1)}$ |   |   |   | $\delta_{i,k}^{(2)}$ |   |   |   |
|---------------------------|----------------------|---|---|---|----------------------|---|---|---|
|                           | $k$                  |   |   |   | $k$                  |   |   |   |
|                           | 0                    | 1 | 2 | 3 | 0                    | 1 | 2 | 3 |
| 0                         | 1                    | 2 | 0 | 0 | 1                    | 1 | 0 | 0 |
| 1                         | 1                    | 0 | 0 | 1 | 1                    | 0 | 0 | 0 |
| 2                         | 1                    | 0 | 0 | 0 | 0                    | 0 | 0 | 0 |
| 3                         | 1                    | 1 | 0 | 0 | 1                    | 0 | 0 | 0 |
| 4                         | 1                    | 2 | 0 | 0 | 1                    | 1 | 0 | 0 |

|   |   |   |   |   |   |   |   |   |
|---|---|---|---|---|---|---|---|---|
| 5 | 1 | 0 | 0 | 1 | 1 | 0 | 0 | 0 |
| 6 | 1 | 0 | 0 | 0 | 0 | 0 | 0 | 0 |
| 7 | 1 | 1 | 0 | 0 | 1 | 0 | 0 | 0 |

For  $n \geq 3$

$$e_n(u_1) = 4r_2(n-4; 2, 4) + 4r_2(n-5; 2, 4) + 4r_2(n-6; 2, 4) + 4r_2(n-7; 2, 4) + 4r_2(n-8; 2, 4) + \\ + 4r_2(n-1; 3, 4) + 4r_2(n-2; 3, 4) + 4r_2(n-5; 3, 4) + 4r_2(n-6; 3, 4) + 4r_2(n-7; 3, 4) + \\ + 2r_1(n; 3) + 4r_1(n; 2) + 6r_1(n-1; 2) + 4r_1(n; 4) + 4r_1(n-2; 4) + 4r_1(n-3; 4).$$

For  $n \geq 3$

$$e_n(u_1) = \begin{cases} \frac{14n-6}{3}, n \equiv 0, 6(\text{mod } 12) \\ \frac{14n-4}{3}, n \equiv 2, 8(\text{mod } 12) \\ \frac{14n-8}{3}, n \equiv 4, 10(\text{mod } 12) \end{cases}, e_n(u_1) = \begin{cases} \frac{11n+7}{3}, n \equiv 1(\text{mod } 12) \\ \frac{11n+3}{3}, n \equiv 3(\text{mod } 12) \\ \frac{11n+11}{3}, n \equiv 5(\text{mod } 12) \end{cases}, e_n(u_1) = \begin{cases} \frac{11n+1}{3}, n \equiv 7(\text{mod } 12) \\ \frac{11n+9}{3}, n \equiv 9(\text{mod } 12) \\ \frac{11n+5}{3}, n \equiv 11(\text{mod } 12) \end{cases}.$$

### Vertex $u_2$

Tab. 1: Values of  $\sigma_{i,k}$  and  $d(x, x_i)$

| Number of the sector, $i$ | $k$ |   |   |   |   |   |   | $d(x, x_i)$ |
|---------------------------|-----|---|---|---|---|---|---|-------------|
|                           | 1   | 2 | 3 | 4 | 5 | 6 | 7 |             |
| 0                         | 0   | 1 | 2 | 0 | 1 | 1 | 0 | 0           |
| 1                         | 0   | 0 | 0 | 1 | 2 | 1 | 1 | 0           |
| 2                         | 0   | 1 | 1 | 1 | 1 | 0 | 1 | 0           |
| 3                         | 0   | 1 | 1 | 1 | 1 | 1 | 0 | 0           |
| 4                         | 0   | 0 | 2 | 1 | 1 | 1 | 0 | 0           |
| 5                         | 1   | 1 | 1 | 0 | 0 | 1 | 1 | 0           |
| 6                         | 0   | 0 | 1 | 1 | 1 | 1 | 1 | 0           |
| 7                         | 0   | 1 | 1 | 1 | 1 | 1 | 0 | 0           |

Tab. 2: Values of  $\delta_{i,k}^{(1)}$  and  $\delta_{i,k}^{(2)}$ .

| Number of the sector, $i$ | $\delta_{i,k}^{(1)}$ |   |   | $\delta_{i,k}^{(2)}$ |   |   |
|---------------------------|----------------------|---|---|----------------------|---|---|
|                           | $k$                  |   |   | $k$                  |   |   |
|                           | 0                    | 1 | 2 | 0                    | 1 | 2 |
| 0                         | 1                    | 1 | 0 | 0                    | 0 | 0 |
| 1                         | 1                    | 0 | 0 | 0                    | 0 | 0 |
| 2                         | 1                    | 1 | 0 | 0                    | 0 | 0 |
| 3                         | 1                    | 0 | 0 | 0                    | 0 | 0 |
| 4                         | 1                    | 1 | 0 | 0                    | 0 | 0 |
| 5                         | 1                    | 0 | 0 | 0                    | 0 | 0 |
| 6                         | 1                    | 0 | 1 | 0                    | 0 | 0 |
| 7                         | 1                    | 0 | 0 | 0                    | 0 | 0 |

For  $n \geq 1$

$$e_n(u_2) = 3r_2(n-2; 2, 4) + 6r_2(n-3; 2, 4) + 3r_2(n-4; 2, 4) + 4r_2(n-5; 2, 4) + 4r_2(n-6; 2, 4) + r_2(n-1; 3, 4) + \\ + 2r_2(n-2; 3, 4) + 3r_2(n-3; 3, 4) + 3r_2(n-4; 3, 4) + 4r_2(n-5; 3, 4) + 3r_2(n-6; 3, 4) + 4r_2(n-7; 3, 4) + \\ + 2r_1(n; 2) + 2r_1(n-1; 2) + 2r_1(n; 3) + r_1(n-1; 3) + r_1(n-2; 3) + 4r_1(n; 4).$$

For  $n \geq 1$

$$e_n(u_2) = \begin{cases} \frac{25n}{6}, n \equiv 0, 6(\text{mod } 12) \\ \frac{25n-2}{6}, n \equiv 2, 8(\text{mod } 12) \\ \frac{25n+2}{6}, n \equiv 4, 10(\text{mod } 12) \end{cases}, e_n(u_2) = \begin{cases} \frac{25n-1}{6}, n \equiv 1(\text{mod } 12) \\ \frac{25n+3}{6}, n \equiv 3(\text{mod } 12) \\ \frac{25n-5}{6}, n \equiv 5(\text{mod } 12) \end{cases}, e_n(u_2) = \begin{cases} \frac{25n+5}{6}, n \equiv 7(\text{mod } 12) \\ \frac{25n-3}{6}, n \equiv 9(\text{mod } 12) \\ \frac{25n+1}{6}, n \equiv 11(\text{mod } 12) \end{cases}.$$



| krS                                                                                | Plane group                             | $a$                           | $b$    | $\gamma, ^\circ$   |                                 |
|------------------------------------------------------------------------------------|-----------------------------------------|-------------------------------|--------|--------------------|---------------------------------|
| 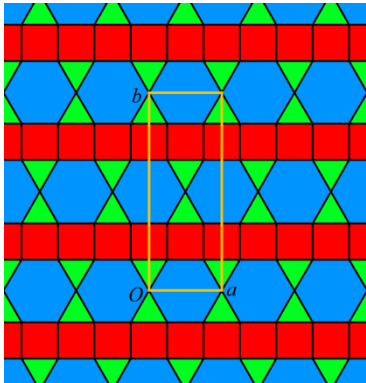  | $c2mm$                                  | 2.0000                        | 5.4642 | 90.0               |                                 |
|                                                                                    |                                         |                               |        |                    |                                 |
|                                                                                    | Vertex                                  | CN                            | $x$    | $y$                |                                 |
|                                                                                    | $u_1$                                   | 4                             | 0      | 0                  |                                 |
|                                                                                    | $u_2$                                   | 4                             | 0.25   | 0.1585             |                                 |
|                                                                                    |                                         |                               |        |                    |                                 |
| Growth polygon                                                                     | Number of the growth polygon vertex $i$ | Vertex fractional coordinates |        | $\alpha_i, ^\circ$ | Length of the ray $d(\Gamma_i)$ |
|  | 0                                       | 1/2                           | 0      | 0                  | 2                               |
|                                                                                    | 1                                       | 1/6                           | 1/6    | 69.896             | 6                               |
|                                                                                    | 2                                       | -1/6                          | 1/6    | 110.104            | 6                               |
|                                                                                    | 3                                       | -1/2                          | 0      | 180                | 2                               |
|                                                                                    | 4                                       | -1/6                          | -1/6   | 249.896            | 6                               |
|                                                                                    | 5                                       | 1/6                           | -1/6   | 290.104            | 6                               |

### Vertex $u_1$

Tab. 1: Values of  $\sigma_{i,k}$  and  $d(x, x_i)$

| Number of the sector, $i$ | $k$ |   |   |   |   |   |   |   |   |    |    |    | $d(x, x_i)$ |
|---------------------------|-----|---|---|---|---|---|---|---|---|----|----|----|-------------|
|                           | 1   | 2 | 3 | 4 | 5 | 6 | 7 | 8 | 9 | 10 | 11 | 12 |             |
| 0                         | 0   | 1 | 1 | 2 | 2 | 1 | 2 | 1 | 0 | 0  | 0  | 0  | 1           |
| 1                         | 0   | 2 | 0 | 2 | 4 | 1 | 4 | 2 | 2 | 2  | 0  | 1  | 0           |
| 2                         | 0   | 1 | 1 | 2 | 2 | 1 | 2 | 1 | 0 | 0  | 0  | 0  | 1           |
| 3                         | 0   | 1 | 1 | 2 | 2 | 1 | 2 | 1 | 0 | 0  | 0  | 0  | 1           |
| 4                         | 0   | 2 | 0 | 2 | 4 | 1 | 4 | 2 | 2 | 2  | 0  | 1  | 0           |
| 5                         | 0   | 1 | 1 | 2 | 2 | 1 | 2 | 1 | 0 | 0  | 0  | 0  | 1           |

Tab. 2: Values of  $\delta_{i,k}^{(1)}$  and  $\delta_{i,k}^{(2)}$ .

| Number of the sector, $i$ | $\delta_{i,k}^{(1)}$ |   |   |   |   | $\delta_{i,k}^{(2)}$ |   |   |   |   |
|---------------------------|----------------------|---|---|---|---|----------------------|---|---|---|---|
|                           | $k$                  |   |   |   |   | $k$                  |   |   |   |   |
|                           | 0                    | 1 | 2 | 3 | 4 | 0                    | 1 | 2 | 3 | 4 |
| 0                         | 1                    | 1 | 1 | 0 | 0 | 1                    | 1 | 0 | 0 | 0 |
| 1                         | 1                    | 0 | 0 | 1 | 1 | 1                    | 0 | 0 | 0 | 0 |
| 2                         | 1                    | 0 | 1 | 1 | 0 | 1                    | 0 | 0 | 0 | 0 |
| 3                         | 1                    | 1 | 1 | 0 | 0 | 1                    | 1 | 0 | 0 | 0 |
| 4                         | 1                    | 0 | 0 | 1 | 1 | 1                    | 0 | 0 | 0 | 0 |
| 5                         | 1                    | 0 | 1 | 1 | 0 | 1                    | 0 | 0 | 0 | 0 |

For  $n \geq 2$

$$e_n(u_1) = 4r_2(n-3; 2, 6) + 4r_2(n-4; 2, 6) + 8r_2(n-5; 2, 6) + 8r_2(n-6; 2, 6) + 4r_2(n-7; 2, 6) + 8r_2(n-8; 2, 6) + \\ + 4r_2(n-9; 2, 6) + 4r_2(n-2; 6, 6) + 4r_2(n-4; 6, 6) + 8r_2(n-5; 6, 6) + 2r_2(n-6; 6, 6) + 8r_2(n-7; 6, 6) + \\ + 4r_2(n-8; 6, 6) + 4r_2(n-9; 6, 6) + 4r_2(n-10; 6, 6) + 2r_2(n-12; 6, 6) + 4r_1(n-1; 2) + 4r_1(n-2; 2) + \\ + 2r_1(n-3; 2) + 4r_1(n; 6) + 4r_1(n-1; 6) + 4r_1(n-3; 6) + 4r_1(n-4; 6).$$

$$\text{For } n \geq 2 \quad e_n(u_1) = \begin{cases} 4n-2, n \equiv 0(\text{mod } 6) \\ \frac{14n+4}{3}, n \equiv 1(\text{mod } 6), \\ \frac{14n-4}{3}, n \equiv 2(\text{mod } 6) \end{cases}, \quad e_n(u_1) = \begin{cases} 4n+2, n \equiv 3(\text{mod } 6) \\ \frac{14n-8}{3}, n \equiv 4(\text{mod } 6) \\ \frac{14n+8}{3}, n \equiv 5(\text{mod } 6) \end{cases}$$

### Vertex $u_2$

Tab. 1: Values of  $\sigma_{i,k}$  and  $d(x, x_i)$

| Number<br>of the sector, $i$ | $k$ |   |   |   |   |   |   |   |   |    |    |    | $d(x, x_i)$ |
|------------------------------|-----|---|---|---|---|---|---|---|---|----|----|----|-------------|
|                              | 1   | 2 | 3 | 4 | 5 | 6 | 7 | 8 | 9 | 10 | 11 | 12 |             |
| 0                            | 0   | 1 | 1 | 2 | 2 | 1 | 2 | 1 | 0 | 0  | 0  | 0  | 0           |
| 1                            | 0   | 2 | 0 | 2 | 4 | 1 | 4 | 2 | 2 | 2  | 0  | 1  | 2           |
| 2                            | 0   | 1 | 1 | 2 | 2 | 1 | 2 | 1 | 0 | 0  | 0  | 0  | 1           |
| 3                            | 1   | 1 | 1 | 2 | 2 | 1 | 1 | 1 | 0 | 0  | 0  | 0  | 0           |
| 4                            | 0   | 2 | 0 | 2 | 4 | 1 | 4 | 2 | 2 | 2  | 0  | 1  | 4           |
| 5                            | 0   | 1 | 1 | 2 | 2 | 1 | 2 | 1 | 0 | 0  | 0  | 0  | 3           |

Tab. 2: Values of  $\delta_{i,k}^{(1)}$  and  $\delta_{i,k}^{(2)}$ .

| Number<br>of the<br>sector, $i$ | $\delta_{i,k}^{(1)}$ |   |   |   |   |   |   |   | $\delta_{i,k}^{(2)}$ |   |   |   |   |   |   |   |
|---------------------------------|----------------------|---|---|---|---|---|---|---|----------------------|---|---|---|---|---|---|---|
|                                 | $k$                  |   |   |   |   |   |   |   | $k$                  |   |   |   |   |   |   |   |
|                                 | 0                    | 1 | 2 | 3 | 4 | 5 | 6 | 7 | 0                    | 1 | 2 | 3 | 4 | 5 | 6 | 7 |
| 0                               | 1                    | 1 | 1 | 0 | 1 | 0 | 0 | 0 | 1                    | 0 | 0 | 0 | 0 | 0 | 0 | 0 |
| 1                               | 1                    | 1 | 0 | 1 | 0 | 0 | 0 | 0 | 1                    | 0 | 0 | 0 | 0 | 0 | 0 | 0 |
| 2                               | 1                    | 1 | 1 | 2 | 2 | 1 | 1 | 1 | 1                    | 1 | 0 | 1 | 1 | 0 | 0 | 0 |
| 3                               | 1                    | 1 | 0 | 0 | 0 | 0 | 0 | 0 | 0                    | 0 | 0 | 0 | 0 | 0 | 0 | 0 |
| 4                               | 1                    | 1 | 0 | 1 | 1 | 0 | 0 | 0 | 1                    | 0 | 1 | 2 | 0 | 1 | 1 | 0 |
| 5                               | 1                    | 1 | 1 | 2 | 2 | 1 | 1 | 1 | 1                    | 1 | 0 | 1 | 1 | 0 | 0 | 0 |

For  $n \geq 5$

$$e_n(u_2) = r_2(n-1; 2, 6) + 2r_2(n-2; 2, 6) + 3r_2(n-3; 2, 6) + 5r_2(n-4; 2, 6) + 7r_2(n-5; 2, 6) + 5r_2(n-6; 2, 6) + \\ + 6r_2(n-7; 2, 6) + 6r_2(n-8; 2, 6) + 2r_2(n-9; 2, 6) + 2r_2(n-10; 2, 6) + r_2(n-11; 2, 6) + 2r_2(n-4; 6, 6) + \\ + 4r_2(n-6; 6, 6) + 4r_2(n-7; 6, 6) + 3r_2(n-8; 6, 6) + 8r_2(n-9; 6, 6) + 3r_2(n-10; 6, 6) + 6r_2(n-11; 6, 6) + \\ + 4r_2(n-12; 6, 6) + 2r_2(n-13; 6, 6) + 3r_2(n-14; 6, 6) + r_2(n-16; 6, 6) + 3r_1(n; 2) + 3r_1(n-1; 2) + \\ + r_1(n-6; 2) + 7r_1(n; 6) + 6r_1(n-1; 6) + 8r_1(n-2; 6) + 7r_1(n-3; 6) + 6r_1(n-4; 6) + 8r_1(n-5; 6).$$

$$\text{For } n \geq 3 \quad e_n(u_2) = \begin{cases} \frac{14n-3}{3}, n \equiv 0, 3(\text{mod } 6) \\ \frac{13n+2}{3}, n \equiv 1, 4(\text{mod } 6) . \\ \frac{13n+1}{3}, n \equiv 2, 5(\text{mod } 6) \end{cases}$$

| krt                                                                                | Plane group                             | $a$                           | $b$    | $\gamma, ^\circ$   |                                 |
|------------------------------------------------------------------------------------|-----------------------------------------|-------------------------------|--------|--------------------|---------------------------------|
| 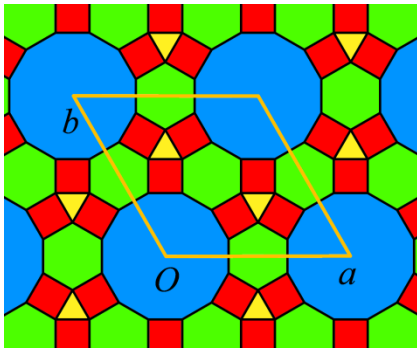  | $p6mm$                                  | 5.4641                        | 5.4641 | 120                |                                 |
|                                                                                    |                                         |                               |        |                    |                                 |
|                                                                                    | Vertex                                  | CN                            | $x$    | $y$                |                                 |
|                                                                                    | $u_1$                                   | 4                             | 0.2113 | 0.6057             |                                 |
|                                                                                    | $u_2$                                   | 3                             | 0.1057 | 0.3943             |                                 |
|                                                                                    |                                         |                               |        |                    |                                 |
| Growth polygon                                                                     | Number of the growth polygon vertex $i$ | Vertex fractional coordinates |        | $\alpha_i, ^\circ$ | Length of the ray $d(\Gamma_i)$ |
|                                                                                    |                                         | $x_i$                         | $y_i$  |                    |                                 |
|  | 0                                       | 1/6                           | 0      | 0                  | 6                               |
|                                                                                    | 1                                       | 1/6                           | 1/6    | 60                 | 6                               |
|                                                                                    | 2                                       |                               | 1/6    | 120                | 6                               |
|                                                                                    | 3                                       | -1/6                          | 0      | 180                | 6                               |
|                                                                                    | 4                                       | -1/6                          | -1/6   | 240                | 6                               |
|                                                                                    | 5                                       | 0                             | -1/6   | 300                | 6                               |

### Vertex $u_1$

Tab. 1: Values of  $\sigma_{i,k}$  and  $d(x, x_i)$

| Number of the sector, $i$ | $k$ |   |   |   |   |   |   |   |   |    |    |    | $d(x, x_i)$ |
|---------------------------|-----|---|---|---|---|---|---|---|---|----|----|----|-------------|
|                           | 1   | 2 | 3 | 4 | 5 | 6 | 7 | 8 | 9 | 10 | 11 | 12 |             |
| 0                         | 0   | 2 | 0 | 0 | 2 | 2 | 4 | 2 | 3 | 2  | 0  | 1  | 0           |
| 1                         | 0   | 0 | 1 | 2 | 2 | 2 | 2 | 2 | 2 | 2  | 2  | 1  | 1           |
| 2                         | 1   | 1 | 1 | 3 | 2 | 1 | 1 | 2 | 3 | 1  | 1  | 1  | 3           |
| 3                         | 0   | 0 | 1 | 2 | 2 | 2 | 2 | 2 | 2 | 2  | 2  | 1  | 0           |
| 4                         | 1   | 1 | 1 | 3 | 2 | 1 | 1 | 2 | 3 | 1  | 1  | 1  | 3           |
| 5                         | 1   | 1 | 1 | 3 | 2 | 1 | 1 | 2 | 3 | 1  | 1  | 1  | 2           |

Tab. 2: Values of  $\delta_{i,k}^{(1)}$  and  $\delta_{i,k}^{(2)}$ .

| Number of the sector, $i$ | $\delta_{i,k}^{(1)}$ |   |   |   |   |   |   |   | $\delta_{i,k}^{(2)}$ |   |   |   |   |   |   |   |
|---------------------------|----------------------|---|---|---|---|---|---|---|----------------------|---|---|---|---|---|---|---|
|                           | $k$                  |   |   |   |   |   |   |   | $k$                  |   |   |   |   |   |   |   |
|                           | 0                    | 1 | 2 | 3 | 4 | 5 | 6 | 7 | 0                    | 1 | 2 | 3 | 4 | 5 | 6 | 7 |
| 0                         | 1                    | 1 | 0 | 1 | 2 | 1 | 0 | 1 | 1                    | 0 | 0 | 0 | 0 | 0 | 0 | 0 |
| 1                         | 1                    | 0 | 1 | 1 | 0 | 1 | 0 | 0 | 0                    | 0 | 0 | 0 | 0 | 0 | 0 | 0 |
| 2                         | 1                    | 0 | 0 | 1 | 1 | 1 | 1 | 0 | 1                    | 1 | 1 | 1 | 1 | 2 | 1 | 1 |
| 3                         | 1                    | 0 | 1 | 1 | 0 | 1 | 0 | 0 | 0                    | 0 | 0 | 0 | 0 | 0 | 0 | 0 |
| 4                         | 1                    | 0 | 1 | 1 | 0 | 1 | 0 | 0 | 0                    | 0 | 0 | 0 | 0 | 0 | 0 | 0 |
| 5                         | 1                    | 0 | 0 | 1 | 1 | 2 | 2 | 1 | 1                    | 0 | 0 | 1 | 0 | 0 | 0 | 0 |

For  $n \geq 4$

$$e_n(u_1) = 2r_2(n-2; 6, 6) + 2r_2(n-3; 6, 6) + 5r_2(n-4; 6, 6) + 8r_2(n-5; 6, 6) + 11r_2(n-6; 6, 6) + 14r_2(n-7; 6, 6) + 10r_2(n-8; 6, 6) + 10r_2(n-9; 6, 6) + 10r_2(n-10; 6, 6) + 12r_2(n-11; 6, 6) + 11r_2(n-12; 6, 6) + 6r_2(n-13; 6, 6) + 4r_2(n-14; 6, 6) + 2r_2(n-15; 6, 6) + r_2(n-16; 6, 6) + 9r_1(n; 6) + 10r_1(n-1; 6) + 10r_1(n-2; 6) + 9r_1(n-3; 6) + 6r_1(n-4; 6) + 6r_1(n-5; 6).$$

$$\text{For } n \geq 4 \quad e_n(u_1) = \begin{cases} \frac{11n-6}{3}, n \equiv 0(\text{mod } 6) \\ \frac{10n+2}{3}, n \equiv 1(\text{mod } 6), \\ \frac{8n+8}{3}, n \equiv 2(\text{mod } 6) \end{cases} \quad e_n(u_1) = \begin{cases} \frac{7n+6}{3}, n \equiv 3(\text{mod } 6) \\ \frac{8n-2}{3}, n \equiv 4(\text{mod } 6) \\ \frac{10n-8}{3}, n \equiv 5(\text{mod } 6) \end{cases}.$$

### Vertex $u_2$

Tab. 1: Values of  $\sigma_{i,k}$  and  $d(x, x_i)$

| Number of the sector, $i$ | $k$ |   |   |   |   |   |   |   |   |    |    |    | $d(x, x_i)$ |
|---------------------------|-----|---|---|---|---|---|---|---|---|----|----|----|-------------|
|                           | 1   | 2 | 3 | 4 | 5 | 6 | 7 | 8 | 9 | 10 | 11 | 12 |             |
| 0                         | 0   | 1 | 1 | 1 | 1 | 1 | 3 | 3 | 3 | 2  | 1  | 1  | 0           |
| 1                         | 0   | 0 | 1 | 2 | 2 | 2 | 2 | 2 | 2 | 2  | 2  | 1  | 2           |
| 2                         | 0   | 0 | 1 | 2 | 2 | 2 | 2 | 2 | 2 | 2  | 2  | 1  | 3           |
| 3                         | 1   | 1 | 1 | 3 | 2 | 1 | 1 | 2 | 3 | 1  | 1  | 1  | 0           |
| 4                         | 0   | 1 | 1 | 1 | 1 | 1 | 3 | 3 | 3 | 2  | 1  | 1  | 3           |
| 5                         | 0   | 1 | 1 | 1 | 1 | 1 | 3 | 3 | 3 | 2  | 1  | 1  | 2           |

Tab. 2: Values of  $\delta_{i,k}^{(1)}$  and  $\delta_{i,k}^{(2)}$ .

| Number of the sector, $i$ | $\delta_{i,k}^{(1)}$ |   |   |   |   |   |   |   | $\delta_{i,k}^{(2)}$ |   |   |   |   |   |   |   |
|---------------------------|----------------------|---|---|---|---|---|---|---|----------------------|---|---|---|---|---|---|---|
|                           | $k$                  |   |   |   |   |   |   |   | $k$                  |   |   |   |   |   |   |   |
|                           | 0                    | 1 | 2 | 3 | 4 | 5 | 6 | 7 | 0                    | 1 | 2 | 3 | 4 | 5 | 6 | 7 |
| 0                         | 1                    | 1 | 0 | 1 | 1 | 1 | 0 | 0 | 1                    | 0 | 0 | 0 | 0 | 0 | 0 | 0 |
| 1                         | 1                    | 1 | 1 | 1 | 0 | 1 | 0 | 0 | 1                    | 0 | 0 | 0 | 0 | 0 | 0 | 0 |
| 2                         | 1                    | 1 | 1 | 1 | 1 | 2 | 1 | 1 | 1                    | 1 | 1 | 1 | 1 | 2 | 1 | 1 |
| 3                         | 1                    | 0 | 1 | 1 | 0 | 1 | 0 | 0 | 0                    | 0 | 0 | 0 | 0 | 0 | 0 | 0 |
| 4                         | 1                    | 0 | 0 | 1 | 0 | 0 | 0 | 0 | 0                    | 0 | 0 | 0 | 0 | 0 | 0 | 0 |
| 5                         | 1                    | 1 | 1 | 2 | 3 | 3 | 1 | 0 | 1                    | 1 | 1 | 1 | 1 | 1 | 0 | 0 |

For  $n \geq 5$

$$e_n(u_2) = r_2(n-1; 6, 6) + 2r_2(n-2; 6, 6) + 2r_2(n-3; 6, 6) + 5r_2(n-4; 6, 6) + 6r_2(n-5; 6, 6) + 7r_2(n-6; 6, 6) + 10r_2(n-7; 6, 6) + 11r_2(n-8; 6, 6) + 14r_2(n-9; 6, 6) + 13r_2(n-10; 6, 6) + 12r_2(n-11; 6, 6) + 11r_2(n-12; 6, 6) + 7r_2(n-13; 6, 6) + 5r_2(n-14; 6, 6) + 2r_2(n-15; 6, 6) + 10r_1(n; 6) + 9r_1(n-1; 6) + 10r_1(n-2; 6) + 10r_1(n-3; 6) + 7r_1(n-4; 6) + 8r_1(n-5; 6).$$

$$\text{For } n \geq 5 \quad e_n(u_2) = \begin{cases} 3n, n \equiv 1, 4(\text{mod } 6) \\ 3n-1, n \equiv 0, 5(\text{mod } 6) \\ 3n+1, n \equiv 2, 3(\text{mod } 6) \end{cases}.$$

| usm                                                                                | Plane group                             | $a$                           | $b$    | $\gamma, ^\circ$   |                                 |
|------------------------------------------------------------------------------------|-----------------------------------------|-------------------------------|--------|--------------------|---------------------------------|
| 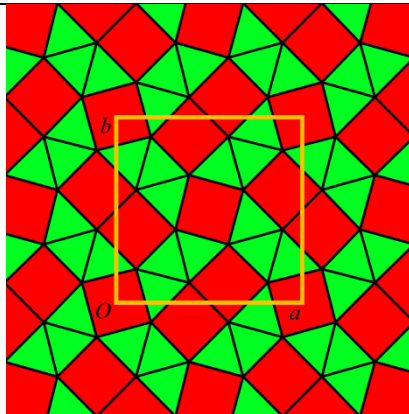  | $p4gm$                                  | 3.3461                        | 3.3461 | 90                 |                                 |
|                                                                                    |                                         |                               |        |                    |                                 |
|                                                                                    | Vertex                                  | CN                            | $x$    | $y$                |                                 |
|                                                                                    | $u_1$                                   | 5                             | 0.1057 | 0.1830             |                                 |
|                                                                                    | $u_2$                                   | 5                             | 0.1057 | 0.6057             |                                 |
|                                                                                    |                                         |                               |        |                    |                                 |
| Growth polygon                                                                     | Number of the growth polygon vertex $i$ | Vertex fractional coordinates |        | $\alpha_i, ^\circ$ | Length of the ray $d(\Gamma_i)$ |
|                                                                                    |                                         | $x_i$                         | $y_i$  |                    |                                 |
|  | 0                                       | 1/4                           | 1/8    | 26.565             | 8                               |
|                                                                                    | 1                                       | 1/5                           | 1/5    | 45                 | 5                               |
|                                                                                    | 2                                       | 1/8                           | 1/4    | 63.435             | 8                               |
|                                                                                    | 3                                       | -1/8                          | 1/4    | 116.565            | 8                               |
|                                                                                    | 4                                       | -1/5                          | 1/5    | 135                | 5                               |
|                                                                                    | 5                                       | -1/4                          | 1/8    | 153.435            | 8                               |
|                                                                                    | 6                                       | -1/4                          | -1/8   | 206.565            | 8                               |
|                                                                                    | 7                                       | -1/5                          | -1/5   | 225                | 5                               |
|                                                                                    | 8                                       | -1/8                          | -1/4   | 243.435            | 8                               |
|                                                                                    | 9                                       | 1/8                           | -1/4   | 296.565            | 8                               |
|                                                                                    | 10                                      | 1/5                           | -1/5   | 315                | 5                               |
|                                                                                    | 11                                      | 1/4                           | -1/8   | 333.435            | 8                               |

**Vertex  $u_1$**

Tab. 1: Values of  $\sigma_{i,k}$  and  $d(x, x_i)$

| Number of the sector, $i$ | $k$ |   |   |   |   |   |   |   |   |    |    |    |    |    |    |    | $d(x, x_i)$ |
|---------------------------|-----|---|---|---|---|---|---|---|---|----|----|----|----|----|----|----|-------------|
|                           | 1   | 2 | 3 | 4 | 5 | 6 | 7 | 8 | 9 | 10 | 11 | 12 | 13 | 14 | 15 | 16 |             |
| 0                         | 0   | 0 | 1 | 1 | 1 | 1 | 2 | 1 | 2 | 1  | 1  | 0  | 1  | 0  | 0  | 0  | 0           |
| 1                         | 0   | 1 | 1 | 1 | 1 | 1 | 1 | 1 | 2 | 1  | 1  | 0  | 1  | 0  | 0  | 0  | 0           |
| 2                         | 0   | 1 | 2 | 3 | 4 | 5 | 5 | 5 | 6 | 5  | 4  | 3  | 2  | 1  | 1  | 1  | 0           |
| 3                         | 0   | 0 | 1 | 1 | 1 | 1 | 2 | 1 | 2 | 1  | 1  | 0  | 1  | 0  | 0  | 0  | 0           |
| 4                         | 0   | 0 | 1 | 1 | 1 | 1 | 2 | 1 | 2 | 1  | 1  | 0  | 1  | 0  | 0  | 0  | 0           |
| 5                         | 1   | 1 | 2 | 3 | 3 | 5 | 5 | 5 | 5 | 5  | 4  | 3  | 3  | 1  | 1  | 1  | 0           |
| 6                         | 0   | 1 | 1 | 1 | 1 | 2 | 1 | 1 | 1 | 1  | 0  | 1  | 1  | 0  | 0  | 0  | 0           |
| 7                         | 0   | 1 | 1 | 1 | 1 | 1 | 1 | 1 | 1 | 1  | 1  | 1  | 1  | 0  | 0  | 0  | 0           |
| 8                         | 1   | 1 | 2 | 3 | 4 | 5 | 6 | 5 | 5 | 5  | 4  | 3  | 2  | 1  | 0  | 1  | 0           |
| 9                         | 0   | 1 | 0 | 1 | 1 | 2 | 1 | 1 | 1 | 1  | 1  | 1  | 1  | 0  | 0  | 0  | 0           |
| 10                        | 0   | 1 | 0 | 1 | 1 | 2 | 1 | 1 | 1 | 1  | 1  | 1  | 1  | 0  | 0  | 0  | 0           |
| 11                        | 1   | 1 | 3 | 3 | 4 | 5 | 5 | 5 | 5 | 5  | 3  | 3  | 2  | 1  | 1  | 1  | 0           |

Tab. 2: Values of  $\delta_{i,k}^{(1)}$  and  $\delta_{i,k}^{(2)}$ .

| Number<br>of the<br>sector, $i$ | $\delta_{i,k}^{(1)}$ |   |   |   |   | $\delta_{i,k}^{(1)}$ |   |   |   |   |
|---------------------------------|----------------------|---|---|---|---|----------------------|---|---|---|---|
|                                 | $k$                  |   |   |   |   | $k$                  |   |   |   |   |
|                                 | 0                    | 1 | 2 | 3 | 4 | 0                    | 1 | 2 | 3 | 4 |
| 0                               | 1                    | 0 | 0 | 0 | 0 | 0                    | 0 | 0 | 0 | 0 |
| 1                               | 1                    | 1 | 0 | 0 | 0 | 0                    | 0 | 0 | 0 | 0 |
| 2                               | 1                    | 0 | 0 | 0 | 0 | 0                    | 0 | 0 | 0 | 0 |
| 3                               | 1                    | 0 | 0 | 0 | 0 | 0                    | 0 | 0 | 0 | 0 |
| 4                               | 1                    | 1 | 1 | 0 | 0 | 0                    | 0 | 0 | 0 | 0 |
| 5                               | 1                    | 0 | 0 | 0 | 0 | 0                    | 0 | 0 | 0 | 0 |
| 6                               | 1                    | 0 | 0 | 0 | 0 | 0                    | 0 | 0 | 0 | 0 |
| 7                               | 1                    | 0 | 0 | 0 | 1 | 0                    | 0 | 0 | 0 | 0 |
| 8                               | 1                    | 0 | 0 | 0 | 0 | 0                    | 0 | 0 | 0 | 0 |
| 9                               | 1                    | 0 | 0 | 0 | 0 | 0                    | 0 | 0 | 0 | 0 |
| 10                              | 1                    | 0 | 0 | 1 | 1 | 0                    | 0 | 0 | 0 | 0 |
| 11                              | 1                    | 0 | 0 | 0 | 0 | 0                    | 0 | 0 | 0 | 0 |

For  $n \geq 1$

$$\begin{aligned}
e_n(u_1) = & 5r_2(n-2;5,8) + 6r_2(n-3;5,8) + 8r_2(n-4;5,8) + 8r_2(n-5;5,8) + 11r_2(n-6;5,8) + 11r_2(n-7;5,8) + \\
& + 8r_2(n-8;5,8) + 12r_2(n-9;5,8) + 8r_2(n-10;5,8) + 7r_2(n-11;5,8) + 4r_2(n-12;5,8) + 8r_2(n-13;5,8) + \\
& + 3r_2(n-1;8,8) + 4r_2(n-2;8,8) + 9r_2(n-3;8,8) + 12r_2(n-4;8,8) + 15r_2(n-5;8,8) + 20r_2(n-6;8,8) + \\
& + 21r_2(n-7;8,8) + 20r_2(n-8;8,8) + 21r_2(n-9;8,8) + 20r_2(n-10;8,8) + 15r_2(n-11;8,8) + 12r_2(n-12;8,8) + \\
& + 9r_2(n-13;8,8) + 4r_2(n-14;8,8) + 3r_2(n-15;8,8) + 4r_2(n-16;8,8) + 4r_1(n;5) + 2r_1(n-1;5) + r_1(n-2;5) + \\
& + r_1(n-3;5) + 2r_1(n-4;5) + 8r_1(n;8).
\end{aligned}$$

For  $n \geq 1$

$$e_n(u_1) = \begin{cases} \frac{27n}{5}, n \equiv 0, 5, 15, 20, 25, 35 \pmod{40} \\ \frac{27n+1}{5}, n \equiv 7, 12, 17, 27, 32, 37 \pmod{40} \\ \frac{27n-1}{5}, n \equiv 3, 8, 13, 23, 28, 33 \pmod{40} \\ \frac{27n+2}{5}, n \equiv 4, 9, 19, 24, 29, 39 \pmod{40} \\ \frac{27n-2}{5}, n \equiv 1, 11, 16, 21, 31, 36 \pmod{40} \end{cases}, \quad e_n(u_1) = \begin{cases} \frac{27n+3}{5}, n \equiv 6 \pmod{40} \\ \frac{27n-3}{5}, n \equiv 34 \pmod{40} \\ \frac{27n+4}{5}, n \equiv 38 \pmod{40} \\ \frac{27n-4}{5}, n \equiv 2 \pmod{40} \\ \frac{27n+5}{5}, n \equiv 30 \pmod{40} \end{cases}, \quad e_n(u_1) = \begin{cases} \frac{27n-5}{5}, n \equiv 10 \pmod{40} \\ \frac{27n+6}{5}, n \equiv 22 \pmod{40} \\ \frac{27n-6}{5}, n \equiv 18 \pmod{40} \\ \frac{27n+7}{5}, n \equiv 14 \pmod{40} \\ \frac{27n-7}{5}, n \equiv 26 \pmod{40} \end{cases}$$

## Vertex $u_2$

Tab. 1: Values of  $\sigma_{i,k}$  and  $d(x, x_i)$

| Number<br>of the<br>sector, $i$ | $k$ |   |   |   |   |   |   |   |   |    |    |    |    |    |    |    | $d(x, x_i)$ |
|---------------------------------|-----|---|---|---|---|---|---|---|---|----|----|----|----|----|----|----|-------------|
|                                 | 1   | 2 | 3 | 4 | 5 | 6 | 7 | 8 | 9 | 10 | 11 | 12 | 13 | 14 | 15 | 16 |             |
| 0                               | 0   | 1 | 1 | 1 | 1 | 1 | 1 | 1 | 1 | 1  | 1  | 1  | 1  | 0  | 0  | 0  | 0           |
| 1                               | 0   | 1 | 1 | 1 | 1 | 1 | 1 | 1 | 1 | 1  | 1  | 1  | 1  | 0  | 0  | 0  | 0           |
| 2                               | 1   | 1 | 2 | 3 | 4 | 5 | 6 | 5 | 5 | 5  | 4  | 3  | 2  | 1  | 0  | 1  | 0           |
| 3                               | 0   | 1 | 1 | 0 | 1 | 1 | 1 | 1 | 2 | 1  | 1  | 1  | 1  | 0  | 0  | 0  | 0           |
| 4                               | 0   | 1 | 1 | 1 | 1 | 1 | 1 | 1 | 1 | 1  | 1  | 1  | 1  | 0  | 0  | 0  | 0           |
| 5                               | 0   | 1 | 2 | 3 | 4 | 5 | 5 | 5 | 6 | 5  | 4  | 3  | 2  | 1  | 1  | 1  | 0           |
| 6                               | 0   | 1 | 1 | 1 | 1 | 1 | 1 | 1 | 2 | 1  | 1  | 0  | 1  | 0  | 0  | 0  | 0           |
| 7                               | 0   | 1 | 1 | 1 | 1 | 1 | 1 | 1 | 2 | 1  | 1  | 0  | 1  | 0  | 0  | 0  | 0           |

|    |   |   |   |   |   |   |   |   |   |   |   |   |   |   |   |   |   |
|----|---|---|---|---|---|---|---|---|---|---|---|---|---|---|---|---|---|
| 8  | 0 | 1 | 2 | 3 | 4 | 5 | 5 | 5 | 6 | 5 | 4 | 3 | 2 | 1 | 1 | 1 | 0 |
| 9  | 0 | 1 | 1 | 1 | 1 | 1 | 1 | 1 | 1 | 1 | 1 | 1 | 1 | 0 | 0 | 0 | 0 |
| 10 | 0 | 1 | 1 | 0 | 1 | 1 | 1 | 1 | 2 | 1 | 1 | 1 | 1 | 0 | 0 | 0 | 0 |
| 11 | 1 | 1 | 2 | 3 | 4 | 5 | 6 | 5 | 5 | 5 | 4 | 3 | 2 | 1 | 0 | 1 | 0 |

Tab. 2: Values of  $\delta_{i,k}^{(1)}$  and  $\delta_{i,k}^{(2)}$ .

| Number<br>of the<br>sector, $i$ | $\delta_{i,k}^{(1)}$ |   |   |   |   | $\delta_{i,k}^{(2)}$ |   |   |   |   |
|---------------------------------|----------------------|---|---|---|---|----------------------|---|---|---|---|
|                                 | $k$                  |   |   |   |   | $k$                  |   |   |   |   |
|                                 | 0                    | 1 | 2 | 3 | 4 | 0                    | 1 | 2 | 3 | 4 |
| 0                               | 1                    | 0 | 0 | 0 | 0 | 0                    | 0 | 0 | 0 | 0 |
| 1                               | 1                    | 0 | 0 | 0 | 1 | 0                    | 0 | 0 | 0 | 0 |
| 2                               | 1                    | 0 | 0 | 0 | 0 | 0                    | 0 | 0 | 0 | 0 |
| 3                               | 1                    | 0 | 0 | 0 | 0 | 0                    | 0 | 0 | 0 | 0 |
| 4                               | 1                    | 1 | 0 | 0 | 1 | 0                    | 0 | 0 | 0 | 0 |
| 5                               | 1                    | 0 | 0 | 0 | 0 | 0                    | 0 | 0 | 0 | 0 |
| 6                               | 1                    | 0 | 0 | 0 | 0 | 0                    | 0 | 0 | 0 | 0 |
| 7                               | 1                    | 1 | 0 | 0 | 0 | 0                    | 0 | 0 | 0 | 0 |
| 8                               | 1                    | 0 | 0 | 0 | 0 | 0                    | 0 | 0 | 0 | 0 |
| 9                               | 1                    | 0 | 0 | 0 | 0 | 0                    | 0 | 0 | 0 | 0 |
| 10                              | 1                    | 1 | 0 | 0 | 1 | 0                    | 0 | 0 | 0 | 0 |
| 11                              | 1                    | 0 | 0 | 0 | 0 | 0                    | 0 | 0 | 0 | 0 |

For  $n \geq 1$

$$\begin{aligned}
e_n(u_2) = & 8r_2(n-2;5,8) + 8r_2(n-3;5,8) + 6r_2(n-4;5,8) + 8r_2(n-5;5,8) + 8r_2(n-6;5,8) + 8r_2(n-7;5,8) + \\
& + 8r_2(n-8;5,8) + 12r_2(n-9;5,8) + 8r_2(n-10;5,8) + 8r_2(n-11;5,8) + 6r_2(n-12;5,8) + 8r_2(n-13;8,5) + \\
& + 2r_2(n-1;8,8) + 4r_2(n-2;8,8) + 8r_2(n-3;8,8) + 12r_2(n-4;8,8) + 16r_2(n-5;8,8) + 20r_2(n-6;8,8) + \\
& + 22r_2(n-7;8,8) + 20r_2(n-8;8,8) + 22r_2(n-9;8,8) + 20r_2(n-10;8,8) + 16r_2(n-11;8,8) + \\
& + 12r_2(n-12;8,8) + 8r_2(n-13;8,8) + 4r_2(n-14;8,8) + 2r_2(n-15;8,8) + 4r_2(n-16;8,8) + \\
& + 4r_1(n;5) + 3r_1(n-1;5) + 3r_1(n-4;5) + 8r_1(n;8).
\end{aligned}$$

For  $n \geq 1$

$$e_n(u_2) = \begin{cases} \frac{27n}{5}, n \equiv 0, 20(\text{mod } 40) \\ \frac{27n+1}{5}, n \equiv 7, 37(\text{mod } 40) \\ \frac{27n-1}{5}, n \equiv 3, 33(\text{mod } 40) \\ \frac{27n+2}{5}, n \equiv 29, 39(\text{mod } 40) \\ \frac{27n-2}{5}, n \equiv 1, 11(\text{mod } 40) \\ \frac{27n+3}{5}, n \equiv 16, 36(\text{mod } 40) \\ \frac{27n-3}{5}, n \equiv 4, 24(\text{mod } 40) \\ \frac{27n+4}{5}, n \equiv 8, 28(\text{mod } 40) \\ \frac{27n-4}{5}, n \equiv 12, 32(\text{mod } 40) \end{cases}, e_n(u_2) = \begin{cases} \frac{27n+5}{5}, n \equiv 5, 15(\text{mod } 40) \\ \frac{27n-5}{5}, n \equiv 25, 35(\text{mod } 40) \\ \frac{27n+9}{5}, n \equiv 13, 23(\text{mod } 40) \\ \frac{27n-6}{5}, n \equiv 38(\text{mod } 40) \\ \frac{27n+7}{5}, n \equiv 34(\text{mod } 40) \\ \frac{27n-9}{5}, n \equiv 17, 27(\text{mod } 40) \\ \frac{27n+8}{5}, n \equiv 21, 31(\text{mod } 40) \\ \frac{27n-8}{5}, n \equiv 9, 19(\text{mod } 40) \end{cases}, e_n(u_2) = \begin{cases} \frac{27n+6}{5}, n \equiv 2(\text{mod } 40) \\ \frac{27n-7}{5}, n \equiv 6(\text{mod } 40) \\ \frac{27n+10}{5}, n \equiv 10(\text{mod } 40) \\ \frac{27n-10}{5}, n \equiv 30(\text{mod } 40) \\ \frac{27n+13}{5}, n \equiv 26(\text{mod } 40) \\ \frac{27n-13}{5}, n \equiv 14(\text{mod } 40) \\ \frac{27n+14}{5}, n \equiv 18(\text{mod } 40) \\ \frac{27n-14}{5}, n \equiv 22(\text{mod } 40) \end{cases}.$$
